# Supplementary material for: What techniques might be used to harness placebo effects in non-malignant pain? A literature review and survey to develop a taxonomy
Source: PubMed Central journal article supplement (PMC5734496; doi:10.1136/bmjopen-2016-015516), 2017-06-30
Supplement: bmjopen-2016-015516.draft_revisions.pdf [file bmjopen-2016-015516.draft_revisions.pdf]

# BMJ Open

## A Taxonomy of Techniques with Potential to Harness Placebo Effects in Non-Malignant Pain

|                                 |                                                                                                                                                                                                                                                                                                                                                                                                                                                                                                                                                        |
|---------------------------------|--------------------------------------------------------------------------------------------------------------------------------------------------------------------------------------------------------------------------------------------------------------------------------------------------------------------------------------------------------------------------------------------------------------------------------------------------------------------------------------------------------------------------------------------------------|
| Journal:                        | <i>BMJ Open</i>                                                                                                                                                                                                                                                                                                                                                                                                                                                                                                                                        |
| Manuscript ID                   | bmjopen-2016-015516                                                                                                                                                                                                                                                                                                                                                                                                                                                                                                                                    |
| Article Type:                   | Research                                                                                                                                                                                                                                                                                                                                                                                                                                                                                                                                               |
| Date Submitted by the Author:   | 12-Dec-2016                                                                                                                                                                                                                                                                                                                                                                                                                                                                                                                                            |
| Complete List of Authors:       | Bishop, Felicity; University of Southampton, Psychology<br>Coghlan, Beverly; University of Southampton<br>Geraghty, Adam; University of Southampton, Primary Care and Population Sciences<br>Everitt, Hazel; University of Southampton, Primary Care and Population Sciences, Faculty of Medicine<br>Little, Paul; University of Southampton, Primary Care and Population Science;<br>Holmes, Michelle; University of Southampton, Psychology<br>Seretis, Dionysis; University of Southampton, Psychology<br>Lewith, George; University of Southampton |
| <b>Primary Subject Heading</b>: | Complementary medicine                                                                                                                                                                                                                                                                                                                                                                                                                                                                                                                                 |
| Secondary Subject Heading:      | General practice / Family practice, Research methods, Rheumatology, Rehabilitation medicine                                                                                                                                                                                                                                                                                                                                                                                                                                                            |
| Keywords:                       | placebos, placebo effect, nocebo effect, translational research, review, classification                                                                                                                                                                                                                                                                                                                                                                                                                                                                |
|                                 |                                                                                                                                                                                                                                                                                                                                                                                                                                                                                                                                                        |

SCHOLARONE™  
Manuscripts

## A Taxonomy of Techniques with Potential to Harness Placebo Effects in Non-Malignant Pain

Running head: Taxonomy of techniques to harness placebo effects

Authors: Felicity L Bishop PhD <sup>a,b</sup>, Beverly Coghlan MSc <sup>b</sup>, Adam WA Geraghty PhD <sup>b</sup>, Hazel Everitt PhD <sup>b</sup>, Paul Little FMedSci <sup>b</sup>, Michelle M Holmes MRes <sup>a</sup>, Dionysis Seretis MRes <sup>a</sup>, George Lewith MRCGP <sup>b</sup>

a. Department of Psychology, Faculty of Social Human and Mathematical Sciences, Building 44 Highfield Campus, University of Southampton, Southampton SO17 1BJ United Kingdom.

b. Primary Care and Population Sciences, Aldermoor Health Centre, University of Southampton, Southampton, SO16 5ST, United Kingdom.

Emails: Felicity Bishop: [F.L.Bishop@southampton.ac.uk](mailto:F.L.Bishop@southampton.ac.uk); Beverly Coghlan: [beverly101@btinternet.com](mailto:beverly101@btinternet.com); Adam Geraghty: [A.W.Geraghty@soton.ac.uk](mailto:A.W.Geraghty@soton.ac.uk); Hazel Everitt: [H.A.Everitt@soton.ac.uk](mailto:H.A.Everitt@soton.ac.uk); Paul Little: [P.Little@soton.ac.uk](mailto:P.Little@soton.ac.uk); Michelle Holmes: [M.M.Holmes@soton.ac.uk](mailto:M.M.Holmes@soton.ac.uk); Dionysis Seretis: [ds2g14@soton.ac.uk](mailto:ds2g14@soton.ac.uk); George Lewith: [gl3@soton.ac.uk](mailto:gl3@soton.ac.uk).

Corresponding author: Felicity L Bishop. Email: [F.L.Bishop@southampton.ac.uk](mailto:F.L.Bishop@southampton.ac.uk). Phone: +44 (0)23 8059 9020. Fax: +44 (0)23 8059 4597. Psychology, Faculty of Social and Human Sciences, Building 44 Highfield Campus, University of Southampton, Southampton SO17 1BJ United Kingdom.

## Abstract

Objectives. Placebo effects can be large and clinically meaningful but are seldom fully exploited in clinical practice. This review aimed to facilitate translational research by producing a taxonomy of applicable techniques that could augment placebo analgesia in clinical practice.

Design. Literature review and survey.

Methods. We systematically analysed methods used to elicit placebo effects in 169 clinical and laboratory-based studies involving non-malignant pain, drawn from 7 systematic reviews. In a validation exercise we surveyed 33 leading placebo researchers (M=12 years' research experience, SD=9.8).

Results. The final taxonomy defines 30 procedures that may contribute to placebo effects in clinical and experimental research, proposes 60 possible clinical applications, and classifies procedures into 5 domains: the *Patient's Characteristics and Belief* (5 procedures and 11 clinical applications); the *Practitioner's Characteristics and Beliefs* (2 procedures and 4 clinical applications); the *Healthcare Setting* (8 procedures and 13 clinical applications); *Treatment Characteristics* (8 procedures and 14 clinical applications); and *The Patient-Practitioner Interaction* (7 procedures and 18 clinical applications).

Conclusions. The taxonomy provides a preliminary and novel tool with potential to guide translational research aiming to harness placebo effects for patient benefit in practice.

Keywords: placebos; placebo effect; nocebo effect; translational research; review; classification

## Article Summary

### Strengths and Limitations of this Study

- This is a novel attempt to use existing studies to conceptualise the factors that might contribute to placebo effects in clinical trials.
- We drew on both clinical trials and laboratory-based studies of placebo effects, in order to generate a more comprehensive list of factors that might contribute to placebo effects than would be possible by relying on just one literature.
- A systematic approach to data synthesis, based on qualitative research methods, was used to identify and classify procedures that might contribute to placebo effects in clinical trials.
- The development of the taxonomy did not incorporate very recent placebo trials or studies.
- The selection of reviews used to determine which original studies to include in the development process was somewhat arbitrary.

## Introduction

There is compelling evidence that factors other than the active ingredients of treatment can have substantial effects on symptoms, particularly non-malignant pain<sup>1,2</sup>. Such 'placebo effects' can be defined as the physiological and/or psychological changes that result from the meaning a person experiences in a health care setting<sup>3,4</sup>. These effects may be as large as treatment effects<sup>5</sup> and occur throughout medicine, especially when doctors and patients interact with each other. They are not routinely deliberately harnessed for patient benefit in clinical practice<sup>6</sup>, possibly because doctors often assume they must deceive patients in order to elicit placebo effects<sup>7,8</sup>. However, this assumption is mistaken because it is not necessary to prescribe placebos in order to elicit placebo effects. For example, the overall analgesic effect of an opioid derives not only from its specific pharmaceutical actions but also from the *meaning* that the patient experiences when consulting the doctor and taking the medicine. The same is true for other types of intervention including physical, surgical, and psychotherapies. One approach that has received initial support is for doctors to use positive suggestion to enhance patients' expectations of benefit<sup>9</sup>. Furthermore, preliminary evidence suggests that openly prescribing placebos might elicit clinically meaningful placebo effects in IBS and depression<sup>10,11</sup>.

Many techniques and procedures contribute to placebo effects and could potentially be simply and ethically adapted for clinical practice, subject to further testing in practice settings<sup>12</sup>. In order to identify and describe such techniques, and thus provide some direction for future research, we reviewed experimental and clinical studies of placebo effects in non-malignant pain. We focused on non-malignant pain because it can be difficult to manage (particularly with current concerns about opioids<sup>13</sup>), the mechanisms underpinning placebo analgesia are reasonably well understood<sup>14</sup>, laboratory-based experimental studies often focus on placebo analgesia, and patients with pain have been shown to display substantial and clinically significant placebo effects<sup>1</sup>. The aim of this project

1  
2  
3 was to facilitate translational research by producing a taxonomy of techniques that may contribute  
4  
5 to observed placebo effects in research settings and could be studied in future as potential  
6  
7 approaches to augmenting placebo enhancement of analgesia in clinical practice.  
8  
9  
10

## 11 12 13 **Methods**

### 14 15 16 17 **Literature Search**

18  
19 We selected seven systematic reviews of different aspects of the placebo literature, chosen to  
20  
21 enable the extraction of information on placebo procedures from a broad range of settings -  
22  
23 comprehensive reviews<sup>15-17</sup>, reviews of placebo effects in clinical populations<sup>2 18</sup> and reviews of  
24  
25 laboratory-based experimental placebo studies<sup>19 20</sup>. After removing duplicates and ineligible studies  
26  
27 (see Figure 1), 169 studies were used to develop the taxonomy (for list of included studies see  
28  
29 Supplementary Digital Content).  
30  
31  
32  
33  
34  
35  
36  
37  
38  
39  
40  
41  
42  
43  
44  
45  
46  
47  
48  
49  
50  
51  
52  
53  
54  
55  
56  
57  
58  
59  
60

Figure 1: Flowchart Showing Identification of Studies

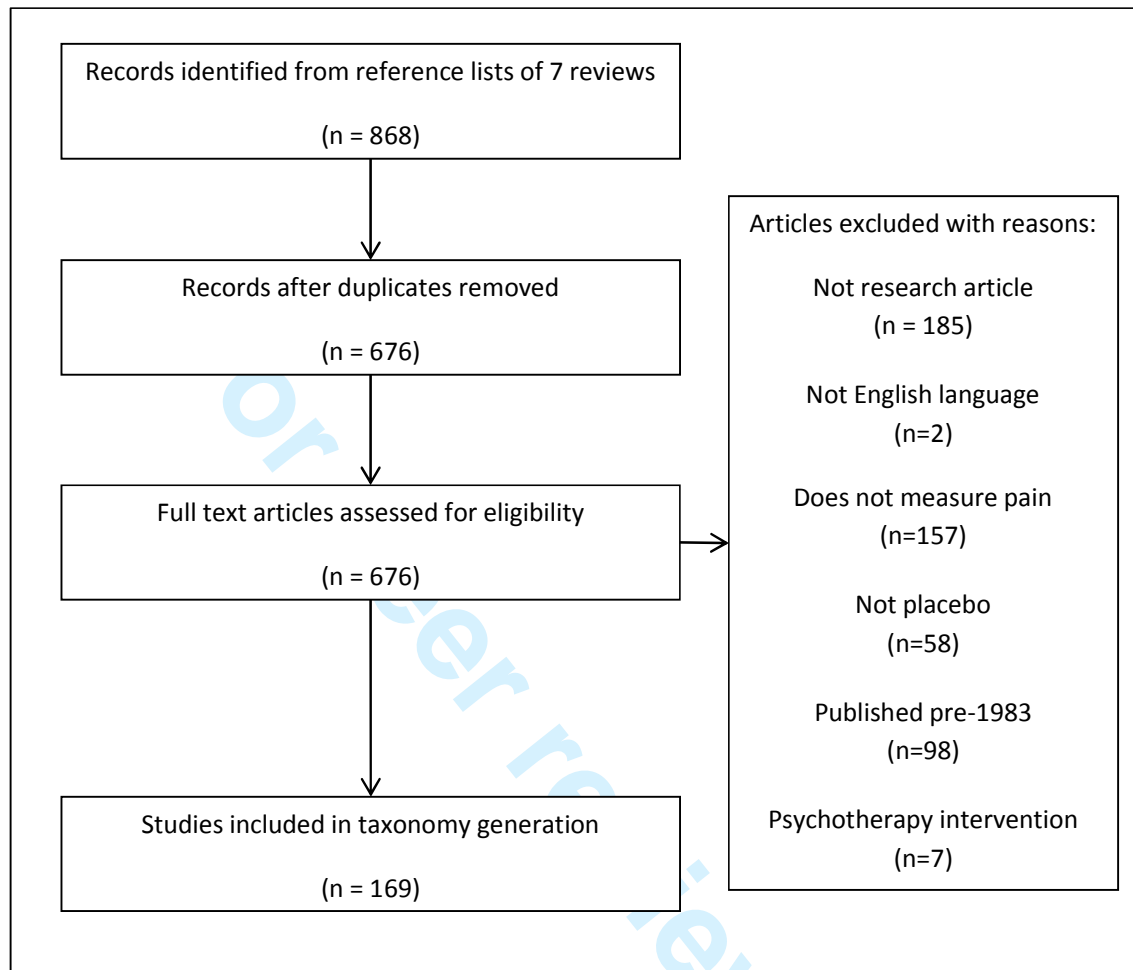

Studies were eligible for inclusion if they: reported original research in which some participants received a placebo intervention, were published since 1983, published in English language, reported a non-malignant pain outcome. Studies were excluded if they: were published before 1983 (because means of generating context-dependent placebo effects may be sensitive to social and cultural changes over time, e.g. patient preferences for particular communication styles and thus their effectiveness in modifying expectations may have changed over time) or examined psychotherapeutic interventions (because it is difficult to disentangle the active ingredients of psychotherapy from the effect of the meaning of the intervention <sup>21</sup>).

### Data Extraction and Synthesis

Descriptions of all events that occurred in the placebo groups during each of the 169 studies (e.g. medical, administrative, and ethical procedures) were extracted into a piloted form by one author and checked by a second. These events were reviewed for duplication and overlap. This resulted in an initial list of 43 procedures that might contribute to placebo effects (e.g. informed consent processes, taking placebo pills, conditioning protocols). Study authors were not contacted for further information about method used.

To synthesise the data and develop our taxonomy items we used systematic and rigorous methods derived from qualitative research. We began with a deductive analysis, which aimed to categorise the procedures in a way that is intuitively appealing, accessible, and clinically relevant by sorting them into five previously-identified contextual domains of healthcare: patients' characteristics/beliefs, practitioners' characteristics/beliefs, doctor-patient relationship, superficial treatment characteristics, and the healthcare environment<sup>22</sup>. We then engaged in a constant comparative analysis, a technique that originates in grounded theory<sup>23</sup>. Procedures and examples of their use were all systematically compared to each other; similar procedures were then merged and all procedures were classified into one of the five domains, the definitions of which were clarified iteratively between all the authors over the course of the classification exercise. This resulted in a more parsimonious list of 29 procedures classified by domain. These 29 procedures were then critically examined to ensure they were theoretically plausible means of producing placebo effects. We focused on three core psychological mechanisms<sup>16 24-27</sup>: response expectancy<sup>28</sup>; conditioning and social learning<sup>29</sup>; and affect, including motivation and anxiety-reduction<sup>15 30</sup>. However, we acknowledge that these mechanisms are difficult to tease apart<sup>31</sup> and that alternative mechanisms have been proposed<sup>4</sup> and so we erred on the side of inclusivity. Neurobiological mechanisms of placebo analgesia have been described<sup>14 32</sup> but a detailed consideration of how



1  
2  
3 these might apply to the procedures in the taxonomy would be highly speculative and was beyond  
4  
5 the scope of this project (for discussion of clinical applications of the neuroscience of placebo effects  
6  
7 see<sup>33</sup>). Four procedures deemed very unlikely to produce placebo effects (e.g. Conveying a Neutral  
8  
9 Therapeutic Message) were excluded, leaving 25 procedures that might plausibly contribute to  
10  
11 placebo effects. The multidisciplinary team of authors then generated possible clinical applications  
12  
13 of each of these 25 procedures.  
14  
15

### 16 17 18 19 **Validating the Taxonomy**

20  
21 To ensure our taxonomy was comprehensive we surveyed leading placebo researchers (authors of  
22  
23 major publications on placebo effects, attendees at an international symposium on placebo effects,  
24  
25 and GPs with an interest in placebo effects). Ethical approval for the survey was obtained from the  
26  
27 host institution (reference: 4741). Completed electronic surveys including informed consent were  
28  
29 received from 33 researchers (52% response rate) experienced in placebo research (M=12 years'  
30  
31 experience, SD=9.8). Respondents were shown our draft taxonomy and asked whether, for each  
32  
33 domain, they knew of any other procedures that could elicit placebo responses. The proportion  
34  
35 answering yes ranged from 22% (Healthcare Setting domain) to 50% (Superficial Treatment  
36  
37 Characteristics domain). Respondents suggested 85 additions which were screened against existing  
38  
39 items and for theoretical plausibility: 80 of the suggested additions were extra details or suggested  
40  
41 clinical applications of existing items; five were new and distinct plausible procedures that were  
42  
43 added to the taxonomy, giving a final total of 30 items.  
44  
45  
46  
47  
48

### 49 **Analysis**

50  
51 The use of each procedure in the 30-item taxonomy was assessed across all 169 studies in the  
52  
53 review. Two authors independently rated the presence of each procedure in each study (Kappa =  
54  
55 0.93, discrepancies were resolved through discussion).  
56  
57  
58  
59  
60

## Results

The taxonomy defines 30 procedures that may contribute to placebo effects observed in clinical and experimental research, and classifies them into 5 domains. Table 1 presents the main taxonomy, listing and defining all 30 procedures within 5 domains. Table 2 suggests clinical applications of each procedure. Table 3 shows the frequency of use of each procedure in clinical and experimental studies. Below we describe the procedures within each domain in turn.

Table 1. Taxonomy of Procedures to Elicit Placebo Effects in Non-Malignant Pain

| Procedure Derived from Literature                                             | Definition                                                                                                                                                                                                                                                       |
|-------------------------------------------------------------------------------|------------------------------------------------------------------------------------------------------------------------------------------------------------------------------------------------------------------------------------------------------------------|
| <b>The Patient's Beliefs and Characteristics</b>                              |                                                                                                                                                                                                                                                                  |
| 1. Select Participants Based on Treatment History.                            | Screen and select participants (or subgroups) against inclusion criteria related to issues such as medical/treatment history, e.g. naive to intervention being tested (not just contraindications).                                                              |
| 2. Create Positive Expectancy.                                                | Deliberately and explicitly suggest to participants that the intervention will be effective for them (not as part of informed consent process).                                                                                                                  |
| 3. Reduce Negative Expectancy. <sup>a</sup>                                   | The potentially negative or harmful procedures and characteristics of the treatment are deliberately minimised in information for participants.                                                                                                                  |
| 4. Convey a Positive Therapeutic Message through Informed Consent Procedures. | Convey (verbally or in writing) a positive therapeutic message through the content of informed consent. The message might be explicit (e.g. "this intervention is usually effective in most people") or implicit (e.g. "this treatment is an antihypertensive"). |
| 5. Harness Socio-cultural Context. <sup>a</sup>                               | Tailor the intervention according to the participant's social and cultural context and history.                                                                                                                                                                  |
| <b>The Practitioner's Beliefs and Characteristics</b>                         |                                                                                                                                                                                                                                                                  |
| 6. Practitioner Expectancy.                                                   | The person delivering the treatment expects it to be effective for the patient.                                                                                                                                                                                  |
| 7. Practitioner's Personal Characteristics.                                   | The practitioner's personal and/or professional characteristics (e.g. status) are modified (through selecting practitioners with different characteristics) and/or emphasised to participants.                                                                   |
| <b>The Healthcare Setting</b>                                                 |                                                                                                                                                                                                                                                                  |
| 8. Active Recruitment.                                                        | Actively seek out and recruit participants (e.g. advertising for specific types of patients, writing personally to individual eligible patients identified through medical records).                                                                             |
| 9. Active Retention.                                                          | Make participants feel valued by attempting to keep them in a study (e.g. contact participants if they miss an appointment, incentivise attendance through monetary or non-monetary gifts).                                                                      |
| 10. Follow-up.                                                                | Assess participants after the intervention/ experiment to assess long-term maintenance or changes in effects over at least 6 months.                                                                                                                             |
| 11. Follow a Standardised Protocol.                                           | The intervention is delivered according to a set, scientifically-derived, protocol, lending credibility to the intervention (and is therefore not individualised for each participant).                                                                          |
| 12. Ethical Oversight.                                                        | Study practices and procedures are explicitly regulated and monitored by an institutional ethics committee, lending credibility to the intervention.                                                                                                             |
| 13. Participating in Research.                                                | Participants know that they are part of research and contributing to the furthering of human knowledge and/or improvement of healthcare for future patients.                                                                                                     |
| 14. Symptom Monitoring.                                                       | Monitor participants' symptoms using self-report measures, clinician/experimenter assessment, or objective                                                                                                                                                       |

|                                                 |                                                                                                                                                                                                                       |
|-------------------------------------------------|-----------------------------------------------------------------------------------------------------------------------------------------------------------------------------------------------------------------------|
| 15. Enhanced Environment. <sup>a</sup>          | measures repeated over time at least twice; patients are aware of the resulting measurements.<br>The physical and interpersonal environment where the intervention is delivered is deliberately enhanced.             |
| <b>Treatment Characteristics</b>                |                                                                                                                                                                                                                       |
| 16. Sham Intervention – Medication.             | An inert substance is administered which is manufactured to appear identical to an active medication (e.g. sugar pill, saline IV, topical agent).                                                                     |
| 17. Sham Interventions – Physical.              | A sham physical intervention is administered which is designed to appear identical to the genuine intervention (e.g. de-activated TENS, non-penetrative acupuncture needles at non-acupuncture points).               |
| 18. Sham Interventions – Attention Only.        | Participants receive study-specific attention in terms of numbers of visits and time spent with study staff but no additional intervention.                                                                           |
| 19. Ineffective substances. <sup>a</sup>        | Products unlikely to be effective or not indicated are administered (e.g. vitamins in the absence of vitamin deficiency).                                                                                             |
| 20. Use Side-Effects.                           | Potential side-effects are highlighted such that the participant can interpret them as evidence of a potent intervention.                                                                                             |
| 21. Matched treatments.                         | To secure blinding, placebo/sham treatments are matched to 'real' treatments (e.g. on mode of administration, dosage, frequency of administration, visual appearance, taste, smell, individual titration procedures). |
| 22. Maximised treatment procedures.             | The procedures and characteristics of the treatment are exaggerated, e.g. through high dose, use of colour, high frequency, large pill size, lengthy duration of intervention, ritualistic administration.            |
| 23. Conditioning.                               | A desired response (e.g. pain relief) is paired with an intervention stimulus (e.g. placebo cream) so that the participant associates the response with the stimulus.                                                 |
| <b>The Patient-Practitioner Interaction</b>     |                                                                                                                                                                                                                       |
| 24. The Process of Informed Consent.            | The participant's formal written and/or verbal informed consent is discussed and obtained.                                                                                                                            |
| 25. Detailed History.                           | A detailed personal and/or medical and/or psychosocial history is obtained from the participant.                                                                                                                      |
| 26. Diagnosis/tests.                            | Additional tests, examinations, or confirmatory diagnostic procedures are undertaken to establish eligibility for the study.                                                                                          |
| 27. Care.                                       | The practitioner deliberately engages the participant with warmth, compassion and empathy.                                                                                                                            |
| 28. Patient-Centred Communication. <sup>a</sup> | The practitioner adopts a style of consultation that they consider to be appropriate for a particular patient.                                                                                                        |
| 29. Extra Attention.                            | The participant receives extra attention from being in the study, for example is seen more frequently or for longer than usual.                                                                                       |
| 30. Continuity of Care.                         | Efforts are made for the same practitioner to see the same participant at each contact.                                                                                                                               |

<sup>a</sup> Items added following survey of researchers.

Table 2. Suggested Potential Clinical Applications of Procedures to Elicit Placebo Effects in Non-Malignant Pain, Subject to Further Research

| Procedure                                                                     | Suggested Clinical Applications                                                                                                                                                                                                                                                            |
|-------------------------------------------------------------------------------|--------------------------------------------------------------------------------------------------------------------------------------------------------------------------------------------------------------------------------------------------------------------------------------------|
| <b>The Patient's Beliefs and Characteristics</b>                              |                                                                                                                                                                                                                                                                                            |
| 1. Select Participants Based on Treatment History.                            | Stop prescribing interventions of a type that a patient has previously not responded to (e.g. tablets); instead, prescribe a different, new, type of treatment (e.g. psychological therapy).                                                                                               |
| 2. Create Positive Expectancy.                                                | Tell the patient the intervention is likely to be effective.<br>Elicit patients' treatment and illness beliefs and expectations, and dispel any misconceptions.<br>Empower patients to self-care.                                                                                          |
| 3. Reduce Negative Expectancy.                                                | Limit emphasis on major potential side effects, and describe how uncommon they are.<br>Hide cessation of analgesia administration (e.g. as in Benedetti <sup>34</sup> ), after obtaining advanced consent and ensuring patients are aware they can request additional analgesia if needed. |
| 4. Convey a Positive Therapeutic Message through Informed Consent Procedures. | Provide written and/or verbal information that conveys a positive therapeutic message about treatment.<br>Provide clear rationale for treatment.<br>Provide patient testimonials and supporting literature / media.                                                                        |
| 5. Harness Socio-cultural Context.                                            | Elicit patients' culturally embedded treatment and illness beliefs, preferences and expectations, dispelling any misconceptions.<br>Involve significant others in care.                                                                                                                    |
| <b>The Practitioner's Beliefs and Characteristics</b>                         |                                                                                                                                                                                                                                                                                            |
| 6. Practitioner Expectancy.                                                   | Only prescribe a treatment to patients when the prescriber expects it will be effective; communicate that expectation to patients.                                                                                                                                                         |
| 7. Practitioner's Personal Characteristics.                                   | Honour patient preferences for particular practitioners.<br>Use indicators of expertise/high status in offices, in correspondence, and when referring to other practitioners.<br>Ensure the patient is seen by a practitioner whose views/values are congruent with the patient's.         |
| <b>The Healthcare Setting</b>                                                 |                                                                                                                                                                                                                                                                                            |
| 8. Active Recruitment.                                                        | Actively seek out patients and invite them to attend clinic regarding a particular intervention (as opposed to waiting for patients to present).                                                                                                                                           |
| 9. Active Retention.                                                          | Personally contact patients if they miss an appointment.<br>Use incentives to encourage patients to keep appointments.                                                                                                                                                                     |
| 10. Follow-up.                                                                | Routinely invite patients to book a follow up appointment after an intervention has finished and prior to repeat prescription.<br>Encourage the patient to take responsibility for and self-manage their condition following an intervention.                                              |
| 11. Follow a Standardised Protocol.                                           | Use patient-friendly treatment protocols and share with patients where they fit in that protocol.                                                                                                                                                                                          |
| 12. Ethical Oversight.                                                        | Ensure that patients understand that their treatment protocol is                                                                                                                                                                                                                           |

|                                             |                                                                                                                                                                                                                                                                                                                              |
|---------------------------------------------|------------------------------------------------------------------------------------------------------------------------------------------------------------------------------------------------------------------------------------------------------------------------------------------------------------------------------|
| 13. Participating in Research.              | sanctioned by a higher authority e.g. NICE.<br>Inform patients that all outcomes and GP performance is audited and can contribute to improved knowledge and treatment for future patients.                                                                                                                                   |
| 14. Symptom Monitoring.                     | Ask patients to monitor their symptoms regularly, for example using email, phone apps, web-based systems, paper forms.<br>Assess treatment outcome.<br>Give patients feedback on symptom improvements following monitoring.                                                                                                  |
| 15. Enhanced Environment.                   | Ensure that the environment is professional, pleasant and peaceful.<br>Employ friendly and helpful support staff.                                                                                                                                                                                                            |
| <b>Treatment Characteristics</b>            |                                                                                                                                                                                                                                                                                                                              |
| 16. Sham Intervention – Medication.         | Openly prescribe sham medication.<br>With advanced prior consent, prescribe sham medication.                                                                                                                                                                                                                                 |
| 17. Sham Interventions – Physical.          | Openly prescribe sham physical treatments.<br>With advanced prior consent, prescribe sham physical treatments.                                                                                                                                                                                                               |
| 18. Sham Interventions – Attention Only.    | Increase frequency and duration of consultations.                                                                                                                                                                                                                                                                            |
| 19. Ineffective substances.                 | Prescribe substances that are likely not to cause harm but not clearly indicated or substances unlikely to be effective e.g. simple linctus.                                                                                                                                                                                 |
| 20. Use Side-Effects.                       | Tell patients about side effects associated with positive clinical outcome.                                                                                                                                                                                                                                                  |
| 21. Matched treatments.                     | Design appearance of prescribed substance (e.g. colour, packaging, taste) to match known effective treatments.                                                                                                                                                                                                               |
| 22. Maximised treatment procedures.         | Within safety limits prescribe higher dose/ higher frequency/ larger pill.<br>Use different colour treatments.<br>Instigate ritualistic procedures patients can perform when taking medicines.<br>Maximise adherence to treatment through education, easy follow up appointments, easy repeat prescription arrangements etc. |
| 23. Conditioning.                           | Prescribe highest tolerated dose first, then titrate downwards.<br><br>With consent, begin with active intervention, pair with a seemingly identical placebo then substitute for placebo alone.(e.g. as in Sandler <sup>35</sup> )                                                                                           |
| <b>The Patient-Practitioner Interaction</b> |                                                                                                                                                                                                                                                                                                                              |
| 24. The Process of Informed Consent.        | Actively seek patient consent.<br>Provide treatment options and encourage the patient to choose from these options if they so desire.                                                                                                                                                                                        |
| 25. Detailed History.                       | Take a detailed medical and psychosocial history/update.<br>Ensure the patient feels listened to, e.g. through non-verbal communication and/or capturing information.<br>Ask questions about the meaning of symptoms.                                                                                                        |
| 26. Diagnosis/tests.                        | Provide a definitive/confident diagnosis.<br>Examine the patient fully.                                                                                                                                                                                                                                                      |
| 27. Care.                                   | Allow patient adequate time to tell their story and listen to them.<br>Validate the patient's concerns.<br>Use non-verbal techniques to convey empathy, compassion, warmth.<br>Use touch judiciously.                                                                                                                        |
| 28. Patient-Centred                         | Individualise consultation style according to a patient's preference e.g.                                                                                                                                                                                                                                                    |

|    |                         |                                                                        |
|----|-------------------------|------------------------------------------------------------------------|
| 1  |                         |                                                                        |
| 2  |                         |                                                                        |
| 3  | Communication.          | collaborative vs authoritative.                                        |
| 4  |                         | Engage in collaborative decision-making with the patient.              |
| 5  |                         | Develop shared treatment goals that you and the patient agree on.      |
| 6  | 29. Extra Attention.    | Give extra attention to or show more interest in a patient by seeing   |
| 7  |                         | them more frequently, having longer consultations or visiting at home. |
| 8  |                         | Do not rush the patient.                                               |
| 9  | 30. Continuity of Care. | Ensure patient is cared for by the same doctor.                        |
| 10 |                         | Read records before consultation.                                      |
| 11 |                         |                                                                        |

Note. Suggestions for clinical applications pending research into effectiveness and ethical acceptability in clinical settings.

For peer review only

Table 3. Use of Procedures in Placebo Groups of Clinical and Experimental Studies

| Procedure                                                                    | % of studies that used each procedure: |                  |
|------------------------------------------------------------------------------|----------------------------------------|------------------|
|                                                                              | Experimental (n=58)                    | Clinical (n=111) |
| <b>The Patient's Beliefs and Characteristics</b>                             |                                        |                  |
| 1. Select Participants Based on Treatment History.                           | 55%                                    | 75%              |
| 2. Create Positive Expectancy.                                               | 76%                                    | 5%               |
| 3. Reduce Negative Expectancy.                                               | 3%                                     | 0%               |
| 4. Convey a Positive Therapeutic Message through Informed Consent Procedures | 43%                                    | 1%               |
| 5. Harness Socio-cultural Context.                                           | 0%                                     | 0%               |
| <b>The Practitioner's Beliefs and Characteristics</b>                        |                                        |                  |
| 6. Practitioner Expectancy.                                                  | 0%                                     | 1%               |
| 7. Practitioner's Personal Characteristics.                                  | 9%                                     | 0%               |
| <b>The Healthcare Setting</b>                                                |                                        |                  |
| 8. Active Recruitment.                                                       | 14%                                    | 16%              |
| 9. Active Retention.                                                         | 3%                                     | 2%               |
| 10. Follow-up.                                                               | 2%                                     | 16%              |
| 11. Follow a Standardised Protocol.                                          | 85%                                    | 63%              |
| 12. Ethical Oversight.                                                       | 78%                                    | 69%              |
| 13. Participating in Research.                                               | 86%                                    | 84%              |
| 14. Symptom Monitoring.                                                      | 95%                                    | 89%              |
| 15. Enhanced Environment.                                                    | 5%                                     | 0%               |
| <b>Treatment Characteristics</b>                                             |                                        |                  |
| 16. Sham Intervention – Medication.                                          | 71%                                    | 55%              |
| 17. Sham Interventions – Physical.                                           | 33%                                    | 41%              |
| 18. Sham Interventions – Attention Only.                                     | 2%                                     | 5%               |
| 19. Ineffective substances.                                                  | 0%                                     | 1%               |
| 20. Use Side-Effects.                                                        | 0%                                     | 1%               |
| 21. Matched treatments.                                                      | 40%                                    | 82%              |
| 22. Maximised treatment procedures.                                          | 22%                                    | 3%               |
| 23. Conditioning.                                                            | 41%                                    | 0%               |
| <b>The Patient-Practitioner Interaction</b>                                  |                                        |                  |
| 24. The Process of Informed Consent.                                         | 88%                                    | 77%              |
| 25. Detailed History.                                                        | 19%                                    | 33%              |
| 26. Diagnosis/tests.                                                         | 36%                                    | 41%              |
| 27. Care.                                                                    | 0%                                     | 1%               |
| 28. Patient-Centred Communication.                                           | 0%                                     | 0%               |
| 29. Extra Attention.                                                         | 2%                                     | 63%              |
| 30. Continuity of Care.                                                      | 7%                                     | 14%              |



### The Patient's Characteristics and Beliefs

The taxonomy specifies five procedures that act directly on the patient's characteristics and/or beliefs in ways that might contribute to placebo effects. Procedure 1 involves selecting patients who are most likely to benefit from an intervention based on their history of similar treatments (where similarity is construed broadly at multiple levels, including for example appearance, modality, style, and pharmacology). For example, one might select those patients who have not experienced disappointing results from a similar intervention in the past (as this group might have learned to expect the intervention to fail). This procedure was commonly used by clinical trials and (to a lesser degree) experimental studies.

Procedures 2 (create positive expectancy), 3 (reduce negative expectancy), and 4 (convey a positive therapeutic message), all involve communicating with patients to encourage them to expect beneficial effects of treatment or not to expect side-effects. The majority of experimental studies in our review explicitly encouraged participants to expect treatment benefits, while very few clinical studies explicitly targeted patients' expectations and hardly any studies at all attempted to minimise participants' expectations of side-effects. Procedure 5 involves tailoring the intervention to the patient's socio-cultural context. This approach emerged from the expert feedback and while it seems plausible and ethical to translate into clinical practice, it was not used by any of the reviewed studies.

The procedures in the patients' beliefs and characteristics domain are thought to contribute to placebo effects primarily through altering patients' response expectancy. Selecting patients based on treatment history and tailoring to socio-cultural context are also predicated on learning mechanisms, i.e., learned associations between treatment outcome and treatment properties.

1  
2  
3 There is some evidence that clinicians can give verbal suggestions to alter patients' expectations in  
4 practice and in doing so to reduce patients' pain, particularly acute procedural pain<sup>9 36</sup>. As part of  
5 work to implement these procedures more widely in practice it would be important to investigate  
6 how to secure ethically valid consent for treatment. For example, clinicians might want to  
7 encourage realistically positive patient expectations while providing information about possible  
8 harms without inducing the negative expectations that could trigger nocebo effects<sup>37 38</sup>.

### 19 **The Practitioner's Characteristics and Beliefs**

20  
21 The two procedures in this domain are about using or modifying health care practitioners'  
22 characteristics and/or beliefs. Procedure 6 requires a practitioner to expect a treatment to benefit  
23 the patient. This might contribute to observed placebo effects in patients by influencing a  
24 practitioner's communication about the treatment and hence a patient's response expectations  
25 and/or affective response to the consultation. Only 1% of clinical studies and no experimental  
26 studies reported modifying practitioners' expectations. This procedure has received little attention  
27 in the placebo literature but clinical research in musculoskeletal settings suggests practitioners'  
28 outcome expectations can predict patients' pain outcomes<sup>39</sup>. One way to implement this procedure  
29 in practice would be for practitioners to communicate explicitly that they believe a treatment is  
30 effective, an approach which clearly overlaps with communication interventions designed to help  
31 doctors encourage patients to have positive expectations. Implementing Procedure 6 also depends  
32 on practitioners having relevant high quality evidence readily available and accessible and  
33 understanding this evidence as it applies to the patient.

34  
35  
36  
37  
38  
39  
40  
41  
42  
43  
44  
45  
46  
47  
48  
49  
50  
51  
52  
53 A small proportion of studies (9% of experimental studies and no clinical studies) emphasised a  
54 practitioner's status or other characteristics (Procedure 7). For some patients a high status  
55 practitioner might elicit more confidence in the treatment (and thus higher expectations) and/or a  
56  
57  
58  
59  
60

1  
2  
3 more positive affective response to the consultation<sup>40</sup>. Some aspects of this procedure are already  
4  
5 part of clinical practice, for example the routine display of medical certificates in doctors' offices;  
6  
7 others are inherent in the tools of the doctor, such as the symbolic properties of the stethoscope<sup>41</sup>.  
8  
9 However, there is likely to be scope for testing their effects and augmenting their use if appropriate.  
10

### 11 12 13 14 **The Healthcare Setting**

15  
16 Procedures 8 and 9 relate to the active efforts made in studies to recruit and retain participants  
17  
18 respectively. Clinical and experimental studies both reportedly used these procedures sparingly (<20%  
19  
20 for active recruitment and <5% for active retention). Such efforts may make participants feel valued  
21  
22 and could be implemented in practice through the use of personalised communications from  
23  
24 practitioners to encourage attendance at appointments.  
25  
26  
27  
28  
29  
30

31  
32 Three of the eight procedures in this domain were used by over half of clinical and experimental  
33  
34 studies and relate to basic structural features of research: following a protocol, ethical oversight, and  
35  
36 participating in research (items 11 to 13). They are thought to impact patients' expectations, by  
37  
38 emphasising the legitimacy of the intervention that is being provided and the importance of the  
39  
40 patient's contribution to a bigger project, i.e. generating knowledge. Translating these procedures  
41  
42 into practice could involve, for example, clinicians explicitly talking with patients about official  
43  
44 guidance and treatment protocols that they are following.  
45  
46  
47  
48  
49

50  
51 Symptom monitoring (item 14) was commonly used in both clinical and experimental studies. This  
52  
53 could be implemented in practice for example through repeatedly using patient reported outcome  
54  
55 measures (see<sup>42</sup>) and might contribute to placebo effects through learning mechanisms (e.g. regular  
56  
57 symptom monitoring acts as feedback to motivate health behaviours and/or modify patients' goals).  
58  
59  
60

1  
2  
3 Alternatively, the mere act of asking a patient to monitor their symptoms could convey an  
4 expectation of treatment benefit, altering the meaning of a clinical interaction for the patient.  
5  
6 Traditionally such effects of the act of measurement are dismissed as Hawthorne effects but they  
7  
8 may also be encompassed in broader definitions of placebo effects as meaning effects<sup>43</sup> and could  
9  
10 thus enhance effects in clinical practice despite being considered a nuisance in clinical research.  
11  
12

13  
14  
15  
16  
17 Very few placebo studies (5% of experimental and no clinical studies) reported enhancing the  
18  
19 physical or interpersonal environment (item 15). There is a separate and distinct literature on  
20  
21 environment modifications in health settings that might be usefully integrated with the placebo  
22  
23 literature when developing clinical applications in this area and modelling mechanisms of action<sup>44 45</sup>.  
24  
25  
26  
27

### 28 29 **Treatment Characteristics**

30  
31 Eight procedures in the taxonomy involve modifying the characteristics of a treatment. Three  
32  
33 involve prescribing sham interventions (sham medication – item 16, sham physical interventions –  
34  
35 item 17, and extra attention – item 18) while a fourth involves prescribing a substance unlikely to be  
36  
37 effective for the symptom in question (item 19). These four procedures represent variations in  
38  
39 control conditions used in research and were frequently used by both clinical and experimental  
40  
41 studies (with the exception of extra attention which was only used by 2-5% of studies). Such  
42  
43 controls are thought to operate primarily via expectations, while affective pathways may also be  
44  
45 important when extra attention from trial personnel/medical staff is involved. Of all the procedures  
46  
47 in the taxonomy these four that represent control conditions come closest to the traditional notion  
48  
49 of how placebos could be applied in practice. Given ethical concerns around deceptive prescribing  
50  
51 we suggest that translational research might continue to focus on openly prescribing sham  
52  
53 interventions including placebo pills (as in<sup>10 11</sup>). Other options should not be dismissed entirely  
54  
55  
56  
57 though: advanced consent and even waiving consent are acceptable to some patients and so it is  
58  
59  
60

1  
2  
3 vital for translational research to continue exploring patients', practitioners', and other stakeholders'  
4  
5 views on the acceptability and ethics of diverse ways of prescribing placebos <sup>46-49</sup>.  
6  
7  
8  
9

10  
11 Three procedures in this domain modify the superficial (non-pharmacological or non-defining)  
12 characteristics of treatments. Procedure 20 is to highlight treatment side-effects to patients in order  
13 to encourage patients to see the treatment as potent; this item was very rare, used by only 1% of  
14 clinical studies. Procedure 21 was much more commonly used and involves matching the  
15 appearance of real and control treatments (used by 40% of experimental and 82% of clinical studies),  
16 in order to maintain patient blinding. This could be translated into clinical practice by designing the  
17 appearance of interventions to match patients' beliefs about what effective interventions look like.  
18 Procedure 22 involves maximising or exaggerating the superficial characteristics of treatment in  
19 order to generate larger placebo effects for example by using colour, large pill size, or ritualistic  
20 administration of medicines, manipulations which could alter the meaning of a treatment for a  
21 patient and/or enhance their expectations. 22% of experimental studies reported using this  
22 procedure and one way to translate it into practice would be to create (and test) ritualistic  
23 procedures for patients to engage in when taking medicines.  
24  
25  
26  
27  
28  
29  
30  
31  
32  
33  
34  
35  
36  
37  
38  
39  
40  
41  
42

43 The final procedure in this domain – item 23, conditioning to generate placebo effects - was used  
44 commonly and exclusively by experimental studies (41%). Conditioning protocols generate placebo  
45 effects through learning mechanisms and perhaps could be implemented in practice to reduce  
46 pharmaceutical dosages, as was achieved in a pilot study in children with attention deficit disorder <sup>35</sup>.  
47  
48  
49  
50  
51  
52  
53  
54

### 55 **The Patient-Practitioner Interaction**

56  
57  
58  
59  
60

1  
2  
3 The *Patient-Practitioner Interaction* domain incorporates seven procedures related to the  
4 interpersonal relationship or interactions between a patient and their health care practitioner.  
5  
6 These procedures are thought to operate primarily through affective mechanisms such as reduced  
7 anxiety after telling one's story and being listened to with empathy and acknowledged. Three  
8  
9 procedures are about specific processes that can occur during consultations – obtaining informed  
10 consent (item 24), taking a detailed history (item 25), and performing additional diagnoses or tests  
11 (item 26). Arguably these procedures indicate to the patient that the practitioner respects them, is  
12 interested in their perspective, and is thorough in their diagnosis. They occur in both clinical and  
13 experimental research settings and could be relatively directly translated into practice or optimised  
14 if already used.  
15  
16  
17  
18  
19  
20  
21  
22  
23  
24  
25  
26  
27

28 Two procedures are about the way in which the practitioner engages with the patient:  
29 communicating care (item 27), and patient-centred communication (item 28). These procedures  
30 were surprisingly very rarely described in the studies included in our review, although recently the  
31 nocebo effects of *not* validating a patient's experiences have been shown to be particularly potent<sup>50</sup>.  
32  
33 There is of course a distinct and large literature on doctor-patient communication and fruitful  
34 dialogue is beginning to bridge these fields<sup>51</sup>.  
35  
36  
37  
38  
39  
40  
41  
42  
43  
44

45 The final two procedures in this domain refer to more structural aspects of consultations: extra  
46 attention (item 29, i.e. longer or more frequent appointments) and continuity of care (item 30). 63%  
47 of clinical studies used extra attention while a small proportion of clinical (14%) and experimental  
48 (7%) studies reported providing continuity of care. Directly implementing these procedures in  
49 practice might be challenging given ever increasing constraints on healthcare resources and drives to  
50 reduce cost.  
51  
52  
53  
54  
55  
56  
57  
58  
59  
60

## Discussion

The taxonomy names and describes 30 procedures that may contribute to placebo effects in experimental and clinical studies and classifies them into five domains. It includes 60 theoretically plausible techniques that might be applied clinically, subject to further research on their effectiveness and ethical acceptability in practice. Some of the clinical applications derived from the placebo literature have already been investigated in their own right under other auspices, highlighting the need for the burgeoning translational science of placebo effects to be broad-ranging and interdisciplinary.

We have used rigorous systematic review and qualitative analytic methods complemented by a survey to develop the taxonomy. Investigators often combine multiple techniques in any one 'placebo' (e.g. Create Positive Expectancy + Detailed History + Symptom Monitoring) making it beyond the scope of this project to unpack the effectiveness of individual techniques. Procedures did not always fit neatly into single domains. For example, "Screen for Treatment History" was used to select patients for studies of specific treatments (and was thus placed in the Patient's Beliefs and Characteristics domain), but its clinical application involves selecting a treatment for a specific patient and so could be considered a Treatment Characteristic. Conceptually we would expect interactions between these domains; for example, some procedures categorised in other domains probably operate through causal pathways involving patients' beliefs as proximal determinants of placebo effects<sup>63</sup>. We feel the benefits of having a hierarchical structure (modifiable as the taxonomy is refined with use) outweigh the difficulties inherent in classification. We could have used many published reviews of placebo studies in non-malignant pain to identify original studies to review. Selecting seven such reviews means not using others, thus we might have missed original studies that would have suggested additional procedures. Surveying leading researchers and

1  
2  
3 incorporating their suggestions somewhat mitigates this limitation. The reviews that we selected as  
4  
5 the source of our papers and the papers themselves are now somewhat old examples of the  
6  
7 literature. Future work should review very recent papers and iteratively improve the taxonomy  
8  
9 accordingly.  
10

11  
12  
13  
14  
15 This review extends previous work by Di Blasi et al.<sup>22</sup>, building on their five domains to  
16  
17 systematically develop a detailed taxonomy. We provide a new overarching framework that avoids  
18  
19 the controversial and limited distinction between pure and impure placebos<sup>52 53</sup> and integrates ideas  
20  
21 from the rich clinical and experimental literatures on placebo effects in non-malignant pain. Many  
22  
23 of the components we have identified are likely to be important in other placebo-responsive  
24  
25 conditions including depression<sup>54</sup>, irritable bowel syndrome<sup>55 56</sup>, and insomnia<sup>57</sup>. This taxonomy  
26  
27 can guide two important and related applied research agendas: 1) to understand the components of  
28  
29 placebo effects in clinical settings<sup>40 58-61</sup> and 2) to ethically harness evidence-based placebo effects  
30  
31 to benefit patients<sup>10 11 62</sup>. We hope future studies might draw on the taxonomy to fully describe  
32  
33 their methods and develop new applications, thus facilitating future systematic reviews and the  
34  
35 development of a systematic and theory driven cumulative evidence-base in this complex field.  
36  
37  
38  
39  
40  
41  
42

43 The taxonomy identifies and classifies procedures that may contribute to placebo effects in clinical  
44  
45 trials and experiments, providing an overarching framework for individual components. However,  
46  
47 we do not suggest that every technique in this taxonomy will produce a placebo effect in every  
48  
49 patient and we do not know from this project which techniques are more effective or how they  
50  
51 might be combined to form ethically acceptable and effective complex interventions. This taxonomy  
52  
53 provides the first attempt at a necessary conceptual tool to facilitate future research on these  
54  
55 questions. For example, systematic reviews could use the taxonomy to code procedures in original  
56  
57  
58  
59  
60



1  
2  
3 studies, using this information in meta-regression analysis to examine the contribution of different  
4  
5 procedures to placebo effects<sup>64</sup>. New clinical trials and experiments could extend existing work by  
6  
7 systematically examining and comparing the effects and ethical acceptability of different procedures  
8  
9 in the taxonomy, building a cumulative evidence-base that has real pragmatic applicability to clinical  
10  
11 practice. Some of the suggested clinical applications have been investigated more extensively in  
12  
13 other literatures, in particular doctor-patient communication and the healthcare environment. This  
14  
15 emphasises the need for a multi-disciplinary approach to the translation of placebo research into  
16  
17 practice. One fruitful way forward would be to draw on placebo theories to develop and test more  
18  
19 mechanistic models of complex interventions intended to alter the context of healthcare encounters.  
20  
21  
22  
23  
24  
25

26 Placebo recipients in clinical trials and experiments are exposed to a large number and variety of  
27  
28 procedures, many of which might contribute to measured placebo effects. We have systematically  
29  
30 identified and classified these procedures into five domains, defined them and suggested possible  
31  
32 clinical applications. The resulting taxonomy is presented as a detailed and systematic guide for  
33  
34 future research, which can in turn further refine the taxonomy. Researchers and clinicians can use  
35  
36 the taxonomy to help conceptualise investigations of clinical applications of placebo effects for  
37  
38 patient benefit.  
39  
40  
41  
42  
43  
44  
45  
46  
47  
48  
49  
50  
51  
52  
53  
54  
55  
56  
57  
58  
59  
60

## Funding

The project “Creating a Taxonomy to Harness the Placebo effect in UK primary care” was funded by the National Institute of Health Research (NIHR) School for Primary Care Research (SPCR) (project number 161). This paper presents independent research funded by the National Institute of Health Research (NIHR). The views expressed are those of the author(s) and not necessarily those of the NHS, the NIHR or the Department of Health. Additional funding for BC was provided by Solent NHS Trust. The funders had no role in design and conduct of the study; collection, management, analysis, and interpretation of the data; preparation, review, or approval of the manuscript; and decision to submit the manuscript for publication.

## Acknowledgements

We would like to acknowledge the contribution of all of the researchers who shared their views in the survey, including Przemyslaw Babel PhD, Luana Colloca MD PhD, Professor Michael Doherty, Vanda Faria PhD, Magne Arve Flaten, Dr Sarah Goldingay, Dr John Hughes, Prof. Dr. Robert Juette, Irving Kirsch, Karin Meissner, PD Dr. med., Daniel E Moerman PhD, Meike Shedden Mora PhD, Donald D. Price PhD, Professor Harald Walach. We thank Professor Ted Kaptchuk for comments on an earlier draft of this manuscript.

## Competing Interests

All authors have completed the ICMJE uniform disclosure form at [http://www.icmje.org/coi\\_disclosure.pdf](http://www.icmje.org/coi_disclosure.pdf) and declare: no support from any organisation for the submitted work; no financial relationships with any organisations that might have an interest in the

1  
2  
3 submitted work in the previous three years, no other relationships or activities that could appear to  
4  
5 have influenced the submitted work.  
6  
7

### 8 **Exclusive Licence**

9 The Corresponding Author has the right to grant on behalf of all authors and does grant on behalf of  
10 all authors, a worldwide licence  
11  
12 (<http://www.bmj.com/sites/default/files/BMJ%20Author%20Licence%20March%202013.doc>) to the  
13  
14 Publishers and its licensees in perpetuity, in all forms, formats and media (whether known now or  
15  
16 created in the future), to i) publish, reproduce, distribute, display and store the Contribution, ii)  
17  
18 translate the Contribution into other languages, create adaptations, reprints, include within  
19  
20 collections and create summaries, extracts and/or, abstracts of the Contribution and convert or  
21  
22 allow conversion into any format including without limitation audio, iii) create any other derivative  
23  
24 work(s) based in whole or part on the on the Contribution, iv) to exploit all subsidiary rights to  
25  
26 exploit all subsidiary rights that currently exist or as may exist in the future in the Contribution, v)  
27  
28 the inclusion of electronic links from the Contribution to third party material where-ever it may be  
29  
30 located; and, vi) licence any third party to do any or all of the above.  
31  
32  
33  
34  
35

### 36 **Contributorship Statement**

37 FB designed and led the study, drafted the manuscript, and is guarantor. FB, GL, AWAG, HE, and PL  
38  
39 secured funding for the project. FB designed the study with input and revisions from GL, BC, AWAG,  
40  
41 HE, and PL. BC led data collection and analysis with additional data collection and analysis by MH  
42  
43 and DS. All authors contributed to data interpretation. FB drafted the manuscript and all authors  
44  
45 revised it for important intellectual content. All authors had full access to all of the data in the study  
46  
47 and can take responsibility for the integrity of the data and the accuracy of the data analysis.  
48  
49  
50

### 51 **Data Sharing Statement**

52 No unpublished data available.  
53  
54  
55  
56  
57  
58  
59  
60

## References

1. Zhang W, Robertson J, Jones AC, Dieppe PA, Doherty M. The placebo effect and its determinants in osteoarthritis: meta-analysis of randomised controlled trials. *Ann. Rheum. Dis.* 2008;67(12):1716-23.
2. Hrobjartsson A, Gotzsche PC. Placebo interventions for all clinical conditions. *Cochrane Database of Systematic Reviews* 2010;1:Art. No.: CD003974-DOI: 10.1002/14651858.CD003974.pub3.
3. Brody H. The placebo response. *J. Fam. Pract.* 2000;49:649-54.
4. Moerman DE, Jonas WB. Deconstructing the placebo effect and finding the meaning response. *Ann. Intern. Med.* 2002;136(6):471-76.
5. Howick J, Friedemann C, Tsakok M, Watson R, Tsakok T, Thomas J, et al. Are Treatments More Effective than Placebos? A Systematic Review and Meta-Analysis. *PLoS One* 2013;8(5):e62599.
6. Doherty M, Dieppe P. The "placebo" response in osteoarthritis and its implications for clinical practice. *Osteoarthritis Cartilage* 2009;17(10):1255-62.
7. Lichtenberg P, Heresco-Levy U, Nitzan U. The ethics of the placebo in clinical practice. *J. Med. Ethics* 2004;30:551-54.
8. Colloca L, Miller FG. Harnessing the placebo effect: the need for translational research. *Philosophical Transactions of the Royal Society B: Biological Sciences* 2011;366(1572):1922-30.
9. Peerdeman KJ, van Laarhoven AIM, Keij SM, Vase L, Rovers MM, Peters ML, et al. Relieving patients' pain with expectation interventions: a meta-analysis. *Pain* 2016;157(6):1179-91.
10. Kaptchuk TJ, Friedlander E, Kelley JM, Sanchez MN, Kokkotou E, Singer JP, et al. Placebos without deception: A randomized controlled trial in Irritable Bowel Syndrome. *PLoS One* 2010;5(12):e15591.
11. Kelley JM, Kaptchuk TJ, Cusin C, Lipkin S, Fava M. Open-label placebo for major depressive disorder: a pilot randomized-controlled trial. *Psychother. Psychosom.* 2012;81:312-14.
12. Kaptchuk TJ, Miller FG. Placebo Effects in Medicine. *N. Engl. J. Med.* 2015;373(1):8-9.
13. Dowell D, Haegerich TM, Chou R. CDC guideline for prescribing opioids for chronic pain—United States, 2016. *JAMA* 2016;315(15):1624-45.
14. Colloca L, Klinger R, Flor H, Bingel U. Placebo analgesia: psychological and neurobiological mechanisms. *Pain* 2013;154(4):511-4.
15. Price DD, Finniss DG, Benedetti F. A comprehensive review of the placebo effect: Recent advances and current thought. *Annu. Rev. Psychol.* 2008;59:565-90.
16. Finniss DG, Kaptchuk TJ, Miller FG, Benedetti F. Biological, clinical, and ethical advances of placebo effects. *Lancet* 2010;375(9715):686-95.
17. Manchikanti L, Giordano J, Fellows B, Hirsch JA. Placebo and nocebo in interventional pain management: A friend or a foe - or simply foes? *Pain Physician* 2011;14:E157-E75.
18. Puhl AA, Reinhart CJ, Rok ER, Injeyan HS. An examination of the observed placebo effect associated with the treatment of low back pain - a systematic review. *Pain Research & Management* 2011;16(1):45-52.
19. Faria V, Fredrikson M, Furmark T. Imaging the placebo response: A neurofunctional review. *Eur. Neuropsychopharmacol.* 2008;18(7):473-85.
20. Vase L, Petersen GL, Riley IJ, Price DD. Factors contributing to large analgesic effects in placebo mechanism studies conducted between 2002 and 2007. *Pain* 2009;145(1-2):36-44.
21. Kirsch I. Placebo psychotherapy: Synonym or oxymoron? *J. Clin. Psychol.* 2005;61(7):791-803.
22. Di Blasi Z, Harkness E, Ernst E, Georgiou A, Kleijnen J. Influence of context effects on health outcomes: a systematic review. *Lancet* 2001;357:757-62.
23. Strauss A, Corbin J. *Basics of Qualitative Research Techniques and Procedures for Developing Grounded Theory*. Thousand Oaks: Sage, 1998.

24. Meissner K, Kohls N, Colloca L. Introduction to placebo effects in medicine: mechanisms and clinical implications. *Philosophical Transactions of the Royal Society B: Biological Sciences* 2011;366(1572):1783-89.
25. Price DD, Chung SK, Robinson ME. Conditioning, expectation, and desire for relief in placebo analgesia. *Seminars in Pain Medicine* 2005;3(1):15-21.
26. Benedetti F, Amanzio M. The placebo response: How words and rituals change the patient's brain. *Patient Educ. Couns.* 2011;84(3):413-19.
27. Goffaux P, Leonard G, Marchand S, Rainville P. Placebo analgesia. In: Beaulieu P, Lussier D, Porreca F, Dickenson A, editors. *Pharmacology of Pain*. Seattle, WA: IASP Press, 2010:451-73.
28. Kirsch I. Response expectancy theory and application: A decennial review. *Appl Prev Psychol* 1997;6(2):69-79.
29. Colloca L, Miller FG. How placebo responses are formed: a learning perspective. *Philosophical Transactions of the Royal Society B: Biological Sciences* 2011;366(1572):1859-69.
30. Hyland ME, Whalley B. Motivational concordance: An important mechanism in self-help therapeutic rituals involving inert (placebo) substances. *J. Psychosom. Res.* 2008;65(5):405-13.
31. Stewart-Williams S, Podd J. The placebo-effect: Dissolving the expectancy versus conditioning debate. *Psychol. Bull.* 2004;130 (2):324-40.
32. Benedetti F. Placebo and the New Physiology of the Doctor-Patient Relationship. *Physiol. Rev.* 2013;93(3):1207-46.
33. Jubb J, Bensing JM. The sweetest pill to swallow: How patient neurobiology can be harnessed to maximise placebo effects. *Neurosci. Biobehav. Rev.* 2013;37(10, Part 2):2709-20.
34. Benedetti F, Maggi G, Lopiano L, Lanotte M, Rainero I, Vighetti S, et al. Open versus hidden medical treatments: The patient's knowledge about a therapy affects the therapy outcome. *Prevention & Treatment* 2003;6(1):No.
35. Sandler AD, Bodfish JW. Open-label use of placebos in the treatment of ADHD: a pilot study. *Child. Care. Health Dev.* 2008;34(1):104-10.
36. Mistiaen P, van Osch M, van Vliet L, Howick J, Bishop FL, Di Blasi Z, et al. The effect of patient-practitioner communication on pain: a systematic review. *Eur J Pain* 2015.
37. Planès S, Villier C, Mallaret M. The nocebo effect of drugs. *Pharmacology Research & Perspectives* 2016;4(2):n/a-n/a.
38. Colloca L, Finniss D. Nocebo effects, patient-clinician communication, and therapeutic outcomes. *JAMA* 2012;307(6):567-8.
39. Witt CM, Martins F, Willich SN, Sch tztler L. Can I help you? Physicians' expectations as predictor for treatment outcome. *European Journal of Pain* 2012;16(10):1455-66.
40. White P, Bishop FL, Prescott P, Scott C, Little P, Lewith G. Practice, practitioner or placebo? A multifactorial, mixed methods randomized controlled trial of acupuncture. *Pain* 2012;153:455-62.
41. Rice T. 'The hallmark of a doctor': the stethoscope and the making of medical identity. *Journal of Material Culture* 2010;15(3):287-301.
42. Snyder CF, Aaronson NK, Choucair AK, Elliott TE, Greenhalgh J, Halyard MY, et al. Implementing patient-reported outcomes assessment in clinical practice: a review of the options and considerations. *Qual. Life Res.* 2012;21(8):1305-14.
43. Benedetti F, Carlino E, Piedimonte A. Increasing uncertainty in CNS clinical trials: the role of placebo, nocebo, and Hawthorne effects. *The Lancet Neurology*;15(7):736-47.
44. Drahota A, Ward D, Mackenzie H, Stores R, Higgins B, Gal D, et al. Sensory environment on health-related outcomes of hospital patients (Review). *Cochrane Database of Systematic Reviews* 2012;3:Art. No.: CD005315. DOI: 10.1002/14651858.CD005315.pub2.
45. Dijkstra K, Pieterse M, Pruyn A. Physical environmental stimuli that turn healthcare facilities into healing environments through psychologically mediated effects: systematic review. *J. Adv. Nurs.* 2006;56(2):166-81.

- 1  
2  
3 46. Feffer K, Lichtenberg P, Becker G, Bloch Y, Netzer R, Nitzan U. A comparative study with  
4 depressed patients on the acceptability of placebo use. *Gen. Hosp. Psychiatry* 2016;41:53-6.  
5 47. Ortiz R, Chandros Hull S, Colloca L. Patient attitudes about the clinical use of placebo: qualitative  
6 perspectives from a telephone survey. *BMJ Open* 2016;6(4).  
7 48. Bishop FL, Howick J, Heneghan C, Wolstenholme J, Stevens S, Hobbs FDR, et al. Placebo use in  
8 the United Kingdom: a qualitative study exploring GPs' views on placebo effects in clinical  
9 practice. *Fam. Pract.* 2014;Advance Access:1-7. doi:10.1093/fampra/cmu016.  
10 49. Bishop FL, Aizlewood L, Adams AEM. When and Why Placebo-Prescribing Is Acceptable and  
11 Unacceptable: A Focus Group Study of Patients' Views. *PLoS One* 2014;9(7):e101822.  
12 50. Greville-Harris M, Dieppe P. Bad Is More Powerful than Good: The Nocebo Response in Medical  
13 Consultations. *The American Journal of Medicine* 2015;128(2):126-29.  
14 51. Bensing JM, Verheul W. The silent healer: The role of communication in placebo effects. *Patient*  
15 *Educ. Couns.* 2010;80(3):293-99.  
16 52. Fassler M, Gnadinger M, Rosemann T, Biller-Andorno N. Use of placebo interventions among  
17 Swiss primary care providers. *BMC Health Serv Res* 2009;9(1):144.  
18 53. Howick J, Bishop FL, Heneghan C, Wolstenholme J, Stevens S, Hobbs FDR, et al. Placebo use in  
19 the United Kingdom: results from a national survey of primary care practitioners. *PLoS One*  
20 2013;8(3):e58247. doi:10.1371/journal.pone.0058247.  
21 54. Kirsch I, Sapirstein G. Listening to prozac but hearing placebo: A meta-analysis of antidepressant  
22 medication. *Prevention & Treatment* 1998;1 Article 0002a, posted June 26, 1998.  
23 55. Patel SM, Stason WB, Legedza A, Ock SM, Kaptchuk TJ, Conboy L, et al. The placebo effect in  
24 irritable bowel syndrome trials: a meta-analysis. *Neurogastroenterol. Motil.* 2005;17(3):332-  
25 40.  
26 56. Ford AC, Moayyedi P. Meta-analysis: factors affecting placebo response rate in the irritable  
27 bowel syndrome. *Aliment. Pharmacol. Ther.* 2010;32(2):144-58.  
28 57. Bélanger L, Vallières A, Ivers H, Moreau V, Lavigne G, Morin CM. Meta-analysis of sleep changes  
29 in control groups of insomnia treatment trials. *J. Sleep Res.* 2007;16(1):77-84.  
30 58. Kaptchuk TJ, Kelley JM, Conboy LA, Davis RB, Kerr CE, Jacobson EE, et al. Components of placebo  
31 effect: randomised controlled trial in patients with irritable bowel syndrome. *Br. Med. J.*  
32 2008;336:999-1003.  
33 59. Suarez-Almazor ME, Looney C, Liu Y, Cox V, Pietz K, Marcus DM, et al. A randomized controlled  
34 trial of acupuncture for osteoarthritis of the knee: Effects of patient-provider  
35 communication. *Arthritis Care Res.* 2010;62(9):1229-36.  
36 60. Kaptchuk TJ, Stason WB, Davis RB, Legedza ATR, Schnyer RN, Kerr CE, et al. Sham device v inert  
37 pill: randomised controlled trial of two placebo treatments. *Br. Med. J.* 2006;332(7538):391-  
38 94.  
39 61. Vase L, Baram S, Takakura N, Yajima H, Takayama M, Kaptchuk TJ, et al. Specifying the  
40 nonspecific components of acupuncture analgesia. *Pain* 2013;154(9):1659-67.  
41 62. Sandler A, Glesne C, Geller G. Children's and parents' perspectives on open-label use of placebos  
42 in the treatment of ADHD. *Child. Care. Health Dev.* 2008;34(1):111-20.  
43 63. Kirsch I. Conditioning, expectancy, and the placebo effect: Comment on Stewart-Williams and  
44 Podd (2004). *Psychol. Bull.* 2004;130(2):341-43.  
45 64. Michie S, Abraham C, Whittington C, McAteer J, Gupta S. Effective techniques in healthy eating  
46 and physical activity interventions: a meta-regression. *Health Psychol.* 2009;28(6):690-701.  
47  
48  
49  
50  
51  
52  
53  
54  
55  
56  
57  
58  
59  
60

## Supplementary Digital Content

### List of Included Studies

[1-169]

- [1] Alfano AP, Taylor AG, Foresman PA, Dunk PR, McConnell GG, Gillies GT. Static magnetic fields for treatment of fibromyalgia: A randomized controlled trial. *J Altern Complement Med* 2001;7(1):53.
- [2] Alford JW, Fadale PD. Evaluation of postoperative bupivacaine infusion for pain management after anterior cruciate ligament reconstruction. *Arthroscopy-the Journal of Arthroscopic and Related Surgery* 2003;19(8):855.
- [3] Amanzio M, Benedetti F. Neuropharmacological Dissection of Placebo Analgesia: Expectation-Activated Opioid Systems versus Conditioning-Activated Specific Subsystems. *The Journal of Neuroscience* 1999;19(1):484-494.
- [4] Amanzio M, Pollo A, Maggi G, Benedetti F. Response variability to analgesics: a role for non-specific activation of endogenous opioids. *Pain* 2001;90(3):205-215.
- [5] Amlie E, Weber H, Holme I. Treatment of Acute Low-back Pain with Piroxicam: Results of a Double-blind Placebo-controlled Trial. *Spine* 1987;12(5):473-476.
- [6] Andersen AN, Damm P, Tabor A, Pedersen IM, Harring M. Prevention of Breast Pain and Milk Secretion with Bromocriptine After Second-Trimester Abortion. *Acta Obstet Gynecol Scand* 1990;69(3):235-238.
- [7] Aslaksen PM, Flaten MA. The Roles of Physiological and Subjective Stress in the Effectiveness of a Placebo on Experimentally Induced Pain. *Psychosom Med* 2008;70(7):811-818.
- [8] Atkinson JH, Slater MA, Williams RA, Zisook S, Patterson TL, Grant I, Wahlgren DR, Abramson I, Garfin SR. A placebo-controlled randomized clinical trial of nortriptyline for chronic low back pain. *Pain* 1998;76(3):287-296.
- [9] Bannwarth B, Allaert FA, Avouac B, Rossignol M, Rozenberg S, Valat JP. A randomized, double-blind, placebo controlled triphosphate in study of oral adenosine subacute low back pain. *J Rheumatol* 2005;32(6):1114-1117.
- [10] Basford JR, Sheffield CG, Harmsen WS. Laser therapy: a randomized, controlled trial of the effects of low-intensity Nd:YAG laser irradiation on musculoskeletal back pain. *Arch Phys Med Rehabil* 1999;80(6):647-652.
- [11] Basmajian JV. Acute back pain and spasm. A controlled multicenter trial of combined analgesic and antispasm agents. *Spine (Phila Pa 1976)* 1989;14(4):438-439.
- [12] Benedetti F. The opposite effects of the opiate antagonist naloxone and the cholecystokinin antagonist proglumide on placebo analgesia. *Pain* 1996;64(3):535-543.
- [13] Benedetti F, Amanzio M, Baldi S, Casadio C, Cavallo A, Mancuso M, Ruffini E, Oliaro A, Maggi G. The specific effects of prior opioid exposure on placebo analgesia and placebo respiratory depression. *Pain* 1998;75(2-3):313-319.
- [14] Benedetti F, Amanzio M, Casadio C, Oliaro A, Maggi G. Blockade of nocebo hyperalgesia by the cholecystokinin antagonist proglumide. *Pain* 1997;71(2):135-140.
- [15] Benedetti F, Amanzio M, Maggi G. Potentiation of placebo analgesia by proglumide. *The Lancet* 1995;346(8984):1231.
- [16] Benedetti F, Amanzio M, Vighetti S, Asteggiano G. The Biochemical and Neuroendocrine Bases of the Hyperalgesic Nocebo Effect. *The Journal of Neuroscience* 2006;26(46):12014-12022.
- [17] Benedetti F, Arduino C, Amanzio M. Somatotopic activation of opioid systems by target-directed expectations of analgesia. *J Neurosci* 1999;19(9):3639-3648.
- [18] Benedetti F, Arduino C, Costa S, Vighetti S, Tarenzi L, Rainero I, Asteggiano G. Loss of expectation-related mechanisms in Alzheimer's disease makes analgesic therapies less effective. *Pain* 2006;121(1):133-144.

- 1  
2  
3 [19] Benedetti F, Pollo A, Lopiano L, Lanotte M, Vighetti S, Rainero I. Conscious expectation and  
4 unconscious conditioning in analgesic, motor, and hormonal placebo/nocebo responses. *The*  
5 *Journal of Neuroscience* 2003;23(10):4315-4323.
- 6 [20] Benedetti FMD, Amanzio MMS, Casadio CMD, Cavallo AMD, Cianci RMD, Giobbe RMD, Mancuso  
7 MMD, Ruffini EMD, Maggi GMD. Control of Postoperative Pain by Transcutaneous Electrical  
8 Nerve Stimulation After Thoracic Operations. *The Annals of Thoracic Surgery*  
9 1997;63(3):773-776.
- 10 [21] Berry H, Hutchinson DR. A multicentre placebo-controlled study in general practice to evaluate  
11 the efficacy and safety of tizanidine in acute low-back pain. *J Int Med Res* 1988;16(2):75-82.
- 12 [22] Bingel U, Lorenz J, Schoell E, Weiller C, Büchel C. Mechanisms of placebo analgesia: rACC  
13 recruitment of a subcortical antinociceptive network. *Pain* 2006;120(1):8-15.
- 14 [23] Birbara CA, Puopolo AD, Munoz DR, Sheldon EA, Mangione A, Bohidar NR, Geba GP. Treatment  
15 of chronic low back pain with etoricoxib, a new cyclo-oxygenase-2 selective inhibitor:  
16 improvement in pain and disability--a randomized, placebo-controlled, 3-month trial. *The*  
17 *Journal of Pain : official journal of the American Pain Society* 2003;4(6):307-315.
- 18 [24] Biro P, Meier T, Cummins AS. Comparison of topical anaesthesia methods for venous  
19 cannulation in adults. *Eur J Pain* 1997;1(1):37-42.
- 20 [25] Blanchard EB, Appelbaum KA, Radnitz CL, Michultka D, Morrill B, Kirsch C, Hillhouse J, Evans DD,  
21 Guarnieri P, Attanasio V, et al. Placebo-controlled evaluation of abbreviated progressive  
22 muscle relaxation and of relaxation combined with cognitive therapy in the treatment of  
23 tension headache. *J Consult Clin Psychol* 1990;58(2):210-215.
- 24 [26] Blanchard EB, Appelbaum KA, Radnitz CL, Morrill B, Michultka D, Kirsch C, Guarnieri P, Hillhouse  
25 J, Evans DD, Jaccard J, et al. A controlled evaluation of thermal biofeedback and thermal  
26 biofeedback combined with cognitive therapy in the treatment of vascular headache. *J*  
27 *Consult Clin Psychol* 1990;58(2):216-224.
- 28 [27] Boissel JP, Philippon AM, Gauthier E, Schbath J, Destors JM. Time course of long-term placebo  
29 therapy effects in angina pectoris. *Eur Heart J* 1986;7(12):1030-1036.
- 30 [28] Bova JG, Bhattacharjee N, Jurdi R, Bennett WF. Comparison of no medication, placebo, and  
31 hyoscyamine for reducing pain during a barium enema. *Am J Roentgenol* 1999;172(5):1285-  
32 1287.
- 33 [29] Brinkhaus B, Witt CM, Jena S, Linde K, Streng A, Wagenpfeil S, Irnich D, Walther HU, Melchart D,  
34 Willich SN. Acupuncture in patients with chronic low back pain - A randomized controlled  
35 trial. *Arch Intern Med* 2006;166(4):450-457.
- 36 [30] Camilleri M, Northcutt AR, Kong S, Dukes GE, McSorley D, Mangel AW. Efficacy and safety of  
37 alosetron in women with irritable bowel syndrome: a randomised, placebo-controlled trial.  
38 *The Lancet* 2000;355(9209):1035-1040.
- 39 [31] Carbajal R, Chauvet X, Couderc S, Olivier-Martin M. Randomised trial of analgesic effects of  
40 sucrose, glucose, and pacifiers in term neonates. *BMJ* 1999;319(7222):1393-1397.
- 41 [32] Carette S, Leclaire R, Marcoux S, Morin F, Blaise GA, St-Pierre A, Truchon R, Parent F, Levesque J,  
42 Bergeron V, Montminy P, Blanchette C. Epidural corticosteroid injections for sciatica due to  
43 herniated nucleus pulposus. *N Engl J Med* 1997;336(23):1634-1640.
- 44 [33] Charron J, Rainville P, Marchand S. Direct comparison of placebo effects on clinical and  
45 experimental pain. *Clin J Pain* 2006;22(2):204-211.
- 46 [34] Cherkin DC, Sherman KJ, Avins AL, et al. A randomized trial comparing acupuncture, simulated  
47 acupuncture, and usual care for chronic low back pain. *Arch Intern Med* 2009;169(9):858-  
48 866.
- 49 [35] Chrubasik S, Eisenberg E, Balan E, Weinberger T, Luzzati R, Conradt C. Treatment of low back  
50 pain exacerbations with willow bark extract: a randomized double-blind study. *Am J Med*  
51 2000;109(1):9-14.
- 52  
53  
54  
55  
56  
57  
58  
59  
60



- 1  
2  
3 [36] Chrubasik S, Junck H, Breitschwerdt H, Conradt C, Zappe H. Effectiveness of Harpagophytum  
4 extract WS 1531 in the treatment of exacerbation of low back pain: a randomized, placebo-  
5 controlled, double-blind study. *Eur J Anaesthesiol* 1999;16(2):118-129.
- 6 [37] Chung SK, Price DD, Verne GN, Robinson ME. Revelation of a personal placebo response: Its  
7 effects on mood, attitudes and future placebo responding. *Pain* 2007;132(3):281-288.
- 8 [38] Classen W, Feingold E, Netter P. Influence of sensory suggestibility on treatment outcome in  
9 headache patients. *Neuropsychobiology* 1983;10(1):44-47.
- 10 [39] Coats TL, Borenstein DG, Nangia NK, Brown MT. Effects of valdecoxib in the treatment of  
11 chronic low back pain: results of a randomized, placebo-controlled trial. *Clin Ther*  
12 2004;26(8):1249-1260.
- 13 [40] Colloca L, Benedetti F. How prior experience shapes placebo analgesia. *Pain* 2006;124(1-2):126-  
14 133.
- 15 [41] Colloca L, Benedetti F. Placebo analgesia induced by social observational learning. *Pain*  
16 2009;144(1-2):28-34.
- 17 [42] Colloca L, Petrovic P, Wager TD, Ingvar M, Benedetti F. How the number of learning trials affects  
18 placebo and nocebo responses. *Pain* 2010;151(2):430-439.
- 19 [43] Colloca L, Sigaud M, Benedetti F. The role of learning in nocebo and placebo effects. *Pain*  
20 2008;136(1-2):211-218.
- 21 [44] Conn IG, Marshall AH, Yadav SN, Daly JC, Jaffer M. Transcutaneous electrical nerve stimulation  
22 following appendectomy: the placebo effect. *Ann R Coll Surg Engl* 1986;68(4):191-192.
- 23 [45] Corson SL, Batzer FR, Gocial B, Kelly M, Gutmann JN, Go KJ, English ME. Is paracervical block  
24 anesthesia for oocyte retrieval effective? *Fertil Steril* 1994;62(1):133-136.
- 25 [46] Costello M, Ramundo M, Christopher NC, Powell KR. Ethyl Vinyl Chloride Vapocoolant Spray  
26 Fails to Decrease Pain Associated with Intravenous Cannulation in Children. *Clin Pediatr*  
27 (Phila) 2006;45(7):628-632.
- 28 [47] Coyne PJ, MacMurren M, Izzo T, Kramer T. Transcutaneous electrical nerve stimulator for  
29 procedural pain associated with intravenous needlesticks. *J Intraven Nurs* 1995;18(5):263-  
30 267.
- 31 [48] Dapas F, Hartman SF, Martinez L, Northrup BE, Nussdorf RT, Silberman HM, Gross H. Baclofen  
32 for the treatment of acute low-back syndrome. A double-blind comparison with placebo.  
33 *Spine (Phila Pa 1976)* 1985;10(4):345-349.
- 34 [49] De Pascalis V, Chiaradia C, Carotenuto E. The contribution of suggestibility and expectation to  
35 placebo analgesia phenomenon in an experimental setting. *Pain* 2002;96(3):393-402.
- 36 [50] deCharms RC, Maeda F, Glover GH, Ludlow D, Pauly JM, Soneji D, Gabrieli JDE, Mackey SC.  
37 Control over brain activation and pain learned by using real-time functional MRI. *Proc Natl*  
38 *Acad Sci U S A* 2005;102(51):18626-18631.
- 39 [51] Defrin R, Ariel E, Peretz C. Segmental noxious versus innocuous electrical stimulation for chronic  
40 pain relief and the effect of fading sensation during treatment. *Pain* 2005;115(1):152-160.
- 41 [52] Dickens C, Jayson M, Sutton C, Creed F. The relationship between pain and depression in a trial  
42 using paroxetine in sufferers of chronic low back pain. *Psychosomatics* 2000;41(6):490-499.
- 43 [53] Ditto B, France CR. The effects of applied tension on symptoms in French-speaking blood  
44 donors: a randomized trial. *Health Psychol* 2006;25(3):433-437.
- 45 [54] Ditto B, France CR, Lavoie P, Roussos M, Adler PS. Reducing reactions to blood donation with  
46 applied muscle tension: a randomized controlled trial. *Transfusion (Paris)* 2003;43(9):1269-  
47 1275.
- 48 [55] Dreiser RL, Marty M, Ionescu E, Gold M, Liu JH. Relief of acute low back pain with diclofenac-K  
49 12.5 mg tablets: a flexible dose, ibuprofen 200 mg and placebo-controlled clinical trial. *Int J*  
50 *Clin Pharmacol Ther* 2003;41(9):375-385.
- 51 [56] Erdogmus CB, Resch KL, Sabitzer R, Muller H, Nuhr M, Schoggl A, Posch M, Osterode W,  
52 Ungersbock K, Ebenbichler GR. Physiotherapy-based rehabilitation following disc herniation  
53  
54  
55  
56  
57  
58  
59  
60

- operation: results of a randomized clinical trial. *Spine (Phila Pa 1976)* 2007;32(19):2041-2049.
- [57] Faas A, Chavannes AW, van Eijk JT, Gubbels JW. A randomized, placebo-controlled trial of exercise therapy in patients with acute low back pain. *Spine (Phila Pa 1976)* 1993;18(11):1388-1395.
- [58] Fanti L, Gemma M, Passaretti S, Guslandi M, Testoni PA, Casati A, Torri G. Electroacupuncture Analgesia for Colonoscopy: A Prospective, Randomized, Placebo-Controlled Study. *Am J Gastroenterol* 2003;98(2):312-316.
- [59] Forster EL, Kramer JF, Lucy SD, Scudds RA, Novick RJ. Effect of tens on pain, medications, and pulmonary function following coronary artery bypass graft surgery. *CHEST Journal* 1994;106(5):1343-1348.
- [60] Foster KA, Liskin J, Cen S, Abbott A, Armisen V, Globe D, Knox L, Mitchell M, Shtir C, Azen S. The Trager approach in the treatment of chronic headache: a pilot study. *Altern Ther Health Med* 2004;10(5):40-46.
- [61] Foster NE, Thomas E, Barlas P, Hill JC, Young J, Mason E, Hay EM. Acupuncture as an adjunct to exercise based physiotherapy for osteoarthritis of the knee: randomised controlled trial. *BMJ* 2007;335(7617):436.
- [62] Frega A, Stentella P, Di Renzi F, Gallo G, Palazzetti PL, Del Vescovo M, Ciccarone M, Pachi A. Pain evaluation during carbon dioxide laser vaporization for cervical intraepithelial neoplasia: a randomized trial. *Clin Exp Obstet Gynecol* 1994;21(3):188-191.
- [63] Gale GD, Rothbart PJ, Li Y. Infrared therapy for chronic low back pain: a randomized, controlled trial. *Pain Res Manag* 2006;11(3):193-196.
- [64] Geers A, Helfer S, Weiland P, Kosbab K. Expectations and Placebo Response: A Laboratory Investigation into the Role of Somatic Focus. *J Behav Med* 2006;29(2):171-178.
- [65] Geers AL, Wellman JA, Fowler SL, Helfer SG, France CR. Dispositional optimism predicts placebo analgesia. *J Pain* 2010;11(11):1165-1171.
- [66] Goffaux P, Redmond WJ, Rainville P, Marchand S. Descending analgesia--when the spine echoes what the brain expects. *Pain* 2007;130(1-2):137-143.
- [67] Goodenough B, Kampel L, Champion GD, Laubreaux L, Nicholas MK, Ziegler JB, McInerney M. An investigation of the placebo effect and age-related factors in the report of needle pain from venipuncture in children. *Pain* 1997;72(3):383-391.
- [68] Goodkin K, Gullion CM, Agras WS. A randomized, double-blind, placebo-controlled trial of trazodone hydrochloride in chronic low back pain syndrome. *J Clin Psychopharmacol* 1990;10(4):269-278.
- [69] Grevert P, Albert LH, Goldstein A. Partial antagonism of placebo analgesia by naloxone. *Pain* 1983;16(2):129-143.
- [70] Haake M, Muller HH, Schade-Brittinger C, Basler HD, Schafer H, Maier C, Endres HG, Trampisch HJ, Molsberger A. German acupuncture trials (GERAC) for chronic low back pain. Randomized, multicenter, blinded, parallel-group trial with 3 groups *Arch Intern Med* 2007;167(17):1892-1898.
- [71] Hale ME, Ahdieh H, Ma T, Rauck R. Efficacy and safety of OPANA ER (oxymorphone extended release) for relief of moderate to severe chronic low back pain in opioid-experienced patients: a 12-week, randomized, double-blind, placebo-controlled study. *The journal of pain : official journal of the American Pain Society* 2007;8(2):175-184.
- [72] Hargreaves A, Lander J. Use of Transcutaneous Electrical Nerve Stimulation For Postoperative Pain. *Nurs Res* 1989;38(3):159-160.
- [73] Hargreaves KM, Dionne RA, Mueller GP. Plasma Beta-Endorphin-like Immunoreactivity, Pain and Anxiety Following Administration of Placebo in Oral Surgery Patients. *J Dent Res* 1983;62(11):1170-1173.
- [74] Hashish I, Hai HK, Harvey W, Feinmann C, Harris M. Reduction of postoperative pain and swelling by ultrasound treatment: a placebo effect. *Pain* 1988;33(3):303-311.

- 1  
2  
3 [75] Hashish I, Harvey W, Harris M. Anti-inflammatory effects of ultrasound therapy: evidence for a  
4 major placebo effect. *Rheumatology (Oxford)* 1986;25(1):77-81.
- 5 [76] Helms JM. Acupuncture for the management of primary dysmenorrhea. *Obstet Gynecol*  
6 1987;69(1):51-56.
- 7 [77] Hoirus KT, Pflieger B, McDuffie FC, Cotsonis G, Elsangak O, Hinson R, Verzosa GT. A randomized  
8 clinical trial comparing chiropractic adjustments to muscle relaxants for subacute low back  
9 pain. *J Manipulative Physiol Ther* 2004;27(6):388-398.
- 10 [78] Hong C-Z, Chen Y-C, Pon CH, Yu J. Immediate Effects of Various Physical Medicine Modalities on  
11 Pain Threshold of an Active Myofascial Trigger Point. *Journal of Musculoskeletal Pain*  
12 1993;1(2):37-53.
- 13 [79] Hruby G, Ames C, Chen C, Yan Y, Sagar J, Baron P, Landman J. Assessment of efficacy of  
14 transcutaneous electrical nerve stimulation for pain management during office-based  
15 flexible cystoscopy. *Urology* 2006;67(5):914-917.
- 16 [80] Hyland MR, Webber-Gaffney A, Cohen L, Lichtman SW. Randomized Controlled Trial of  
17 Calcaneal Taping, Sham Taping, and Plantar Fascia Stretching for the Short-Term  
18 Management of Plantar Heel Pain. *J Orthop Sports Phys Ther* 2006;36(6):364-371.
- 19 [81] Johansen O, Brox J, Flaten MA. Placebo and Nocebo Responses, Cortisol, and Circulating Beta-  
20 Endorphin. *Psychosom Med* 2003;65(5):786-790.
- 21 [82] Kaptchuk TJ, Stason WB, Davis RB, Legedza ATR, Schnyer RN, Kerr CE, Stone DA, Nam BH, Kirsch  
22 I, Goldman RH. Sham device v inert pill: randomised controlled trial of two placebo  
23 treatments. *Br Med J* 2006;332(7538):391-394.
- 24 [83] Katz J, Pennella-Vaughan J, Hetzel RD, Kanazi GE, Dworkin RH. A Randomized, Placebo-  
25 Controlled Trial of Bupropion Sustained Release in Chronic Low Back Pain. *J Pain*  
26 2005;6(10):656-661.
- 27 [84] Katz N, Ju WD, Krupa DA, Sperling RS, Bozalis Rodgers D, Gertz BJ, Gimbel J, Coleman S, Fisher C,  
28 Nabizadeh S, Borenstein D. Efficacy and safety of rofecoxib in patients with chronic low back  
29 pain: results from two 4-week, randomized, placebo-controlled, parallel-group, double-blind  
30 trials. *Spine (Phila Pa 1976)* 2003;28(9):851-858; discussion 859.
- 31 [85] Katz N, Rauck R, Ahdieh H, Ma T, Gerritsen van der Hoop R, Kerwin R, Podolsky G. A 12-week,  
32 randomized, placebo-controlled trial assessing the safety and efficacy of oxymorphone  
33 extended release for opioid-naïve patients with chronic low back pain. *Curr Med Res Opin*  
34 2007;23(1):117-128.
- 35 [86] Keltner JR, Furst A, Fan C, Redfern R, Inglis B, Fields HL. Isolating the Modulatory Effect of  
36 Expectation on Pain Transmission: A Functional Magnetic Resonance Imaging Study. *The*  
37 *Journal of Neuroscience* 2006;26(16):4437-4443.
- 38 [87] Kerr AR, Drexel CA, Spielman AI. The efficacy and safety of 50 mg penicillin G potassium troches  
39 for recurrent aphthous ulcers. *Oral Surg Oral Med Oral Pathol Oral Radiol Endod*  
40 2003;96(6):685-694.
- 41 [88] Ketenci A, Ozcan E, Karamursel S. Assessment of efficacy and psychomotor performances of  
42 thiocolchicoside and tizanidine in patients with acute low back pain. *Int J Clin Pract*  
43 2005;59(7):764-770.
- 44 [89] Klaber Moffett JA, Richardson PH, Frost H, Osborn A. A placebo controlled double blind trial to  
45 evaluate the effectiveness of pulsed short wave therapy for osteoarthritic hip and knee pain.  
46 *Pain* 1996;67(1):121-127.
- 47 [90] Klein RG, Eek BC. Low-energy laser treatment and exercise for chronic low back pain: double-  
48 blind controlled trial. *Arch Phys Med Rehabil* 1990;71(1):34-37.
- 49 [91] Kober A, Scheck T, Greher M, Lieba F, Fleischhackl R, Fleischhackl S, Randunsky F, Hoerauf K.  
50 Prehospital Analgesia with Acupressure in Victims of Minor Trauma: A Prospective,  
51 Randomized, Double-Blinded Trial. *Anesth Analg* 2002;95(3):723-727 710.1213/00000539-  
52 200209000-200200035.
- 53  
54  
55  
56  
57  
58  
59  
60

- 1  
2  
3 [92] Kong J, Gollub RL, Polich G, Kirsch I, LaViolette P, Vangel M, Rosen B, Kaptchuk TJ. A Functional  
4 Magnetic Resonance Imaging Study on the Neural Mechanisms of Hyperalgesic Nocebo  
5 Effect. *The Journal of Neuroscience* 2008;28(49):13354-13362.
- 6 [93] Kong J, Gollub RL, Rosman IS, Webb JM, Vangel MG, Kirsch I, Kaptchuk TJ. Brain activity  
7 associated with expectancy-enhanced placebo analgesia as measured by functional  
8 magnetic resonance imaging. *J Neurosci* 2006;26(2):381-388.
- 9 [94] Kotani N, Kushikata T, Suzuki A, Hashimoto H, Muraoka M, Matsuki A. Insertion of intradermal  
10 needles into painful points provides analgesia for intractable abdominal scar pain. *Reg*  
11 *Anesth Pain Med* 2001;26(6):532-538.
- 12 [95] Kupers R, Maeyaert J, Boly M, Faymonville ME, Laureys S. Naloxone-insensitive epidural placebo  
13 analgesia in a chronic pain patient. *Anesthesiology* 2007;106(6):1239-1242.
- 14 [96] Lander J, Fowler-Kerry S. TENS for children's procedural pain. *Pain* 1993;52(2):209-216.
- 15 [97] Leibing E, Leonhardt U, Koster G, Goerlitz A, Rosenfeldt J, Hilgers R, Ramadori G. Acupuncture  
16 treatment of chronic low-back pain - a randomized, blinded, placebo-controlled trial with 9-  
17 month follow-up. *Pain* 2002;96 189-196.
- 18 [98] Levine JD, Gordon NC. Influence of the method of drug administration on analgesic response.  
19 *Nature* 1984;312(5996):755-756.
- 20 [99] Licciardone JC, Stoll ST, Fulda KG, Russo DP, Siu J, Winn W, Swift JJ. Osteopathic Manipulative  
21 Treatment for Chronic Low Back Pain: A Randomized Controlled Trial. *Spine*  
22 2003;28(13):1355-1362.
- 23 [100] Lieberman MD, Jarcho JM, Berman S, Naliboff BD, Suyenobu BY, Mandelkern M, Mayer EA. The  
24 neural correlates of placebo effects: a disruption account. *Neuroimage* 2004;22(1):447-455.
- 25 [101] Limoges MF, Rickabaugh B. Evaluation of TENS During Screening Flexible Sigmoidoscopy.  
26 *Gastroenterol Nurs* 2004;27(2):61-68.
- 27 [102] Lin J-G, Lo M-W, Wen Y-R, Hsieh C-L, Tsai S-K, Sun W-Z. The effect of high and low frequency  
28 electroacupuncture in pain after lower abdominal surgery. *Pain* 2002;99(3):509-514.
- 29 [103] Linde K, Streng A, Jurgens S, Hoppe A, Brinkhaus B, Witt C, Wagenpfeil S, Pfaffenrath V,  
30 Hammes MG, Weidenhammer W, Willich SN, Melchart D. Acupuncture for patients with  
31 migraine. A randomized controlled trial. *Journal of the American Medical Association*  
32 2005;293 (2118):2125.
- 33 [104] Lioffi C, Hatira P. Clinical Hypnosis in the Alleviation of Procedure-Related Pain in Pediatric  
34 Oncology Patients. *Int J Clin Exp Hypn* 2003;51(1):4-28.
- 35 [105] Lipman JJ, Miller BE, Mays KS, Miller MN, North WC, Byrne WL. Peak B endorphin  
36 concentration in cerebrospinal fluid: reduced in chronic pain patients and increased during  
37 the placebo response. *Psychopharmacology (Berl)* 1990;102(1):112-116.
- 38 [106] Manchikanti L, Pampati V, Damron K. The role of placebo and nocebo effects of perioperative  
39 administration of sedatives and opioids in interventional pain management. *Pain Physician*  
40 2005;8(4):349-355.
- 41 [107] Martikainen IK, Hagelberg N, Mansikka H, Hietala J, Någren K, Scheinin H, Pertovaara A.  
42 Association of striatal dopamine D2/D3 receptor binding potential with pain but not tactile  
43 sensitivity or placebo analgesia. *Neurosci Lett* 2005;376(3):149-153.
- 44 [108] Matre D, Casey KL, Knardahl S. Placebo-Induced Changes in Spinal Cord Pain Processing. *The*  
45 *Journal of Neuroscience* 2006;26(2):559-563.
- 46 [109] Mayberg HS, Silva JA, Brannan SK, Tekell JL, Mahurin RK, McGinnis S, Jerabek PA. The  
47 functional neuroanatomy of the placebo effect. *A J Psychiatry* 2002;159(5):728-737.
- 48 [110] Melchart D, Streng A, Hoppe A, Brinkhaus B, Witt C, Wagenpfeil S, Pfaffenrath V, Hammes M,  
49 Hummelsberger J, Irnich D, Weidenhammer W, Willich SN, Linde K. Acupuncture in patients  
50 with tension-type headache: randomised controlled trial. *Br Med J* 2005;331 376-382.
- 51 [111] Molsberger AF, Mau J, Pawelec DB, Winkler J. Does acupuncture improve the orthopedic  
52 management of chronic low back pain – a randomized, blinded, controlled trial with 3  
53 months follow up. *Pain* 2002;99(3):579-587.
- 54  
55  
56  
57  
58  
59  
60

- 1  
2  
3 [112] Montgomery G, Kirsch I. Mechanisms of Placebo Pain Reduction: An Empirical Investigation. *Psychological Science* 1996;7(3):174-176.
- 4  
5 [113] Montgomery GH, Kirsch I. Classical conditioning and the placebo effect. *Pain* 1997;72(1-2):107-  
6 113.
- 7  
8 [114] Morton DL, Watson A, El-Deredy W, Jones AKP. Reproducibility of placebo analgesia: Effect of  
9 dispositional optimism. *Pain* 2009;146(1&#2):194-198.
- 10 [115] Muehlbacher M, Nickel MK, Kettler C, Tritt K, Lahmann C, Leiberich PK, Nickel C, Krawczyk J,  
11 Mitterlehner FO, Rother WK, Loew TH, Kaplan P. Topiramate in treatment of patients with  
12 chronic low back pain: a randomized, double-blind, placebo-controlled study. *Clin J Pain*  
13 2006;22(6):526-531.
- 14 [116] Nemoto H, Nemoto Y, Toda H, Mikuni M, Fukuyama H. Placebo analgesia: a PET study. *Exp*  
15 *Brain Res* 2007;179(4):655-664.
- 16 [117] Ockene JK, Barad DH, Cochrane BB, Larson JC, Gass M, Wassertheil-Smoller S, Manson JE,  
17 Barnabei VM, Lane DS, Brzyski RG, Rosal MC, Wylie-Rosett J, Hays J. Symptom experience  
18 after discontinuing use of estrogen plus progestin. *JAMA* 2005;294(2):183-193.
- 19 [118] Pallay RM, Seger W, Adler JL, Ettlinger RE, Quaidoo EA, Lipetz R, O'Brien K, Mucciola L, Skalky  
20 CS, Petruschke RA, Bohidar NR, Geba GP. Etoricoxib reduced pain and disability and  
21 improved quality of life in patients with chronic low back pain: a 3 month, randomized,  
22 controlled trial. *Scand J Rheumatol* 2004;33(4):257-266.
- 23 [119] Pariente J, White P, Frackowiak RSJ, Lewith G. Expectancy and belief modulate the neuronal  
24 substrates of pain treated by acupuncture. *Neuroimage* 2005;25(4):1161-1167.
- 25 [120] Peloso PM, Fortin L, Beaulieu A, Kamin M, Rosenthal N. Analgesic efficacy and safety of  
26 tramadol/ acetaminophen combination tablets (Ultracet) in treatment of chronic low back  
27 pain: a multicenter, outpatient, randomized, double blind, placebo controlled trial. *J*  
28 *Rheumatol* 2004;31(12):2454-2463.
- 29 [121] Petrovic P, Kalso E, Petersson KM, Ingvar M. Placebo and opioid analgesia-- imaging a shared  
30 neuronal network. *Science* 2002;295(5560):1737-1740.
- 31 [122] Pollo A, Amanzio M, Arslanian A, Casadio C, Maggi G, Benedetti F. Response expectancies in  
32 placebo analgesia and their clinical relevance. *Pain* 2001;93(1):77-84.
- 33 [123] Pollo A, Vighetti S, Rainero I, Benedetti F. Placebo analgesia and the heart. *Pain* 2003;102(1-  
34 2):125-133.
- 35 [124] Preyde M. Effectiveness of massage therapy for subacute low-back pain: a randomized  
36 controlled trial. *Can Med Assoc J* 2000;162(13):1815-1820.
- 37 [125] Price DD, Craggs J, Nicholas Verne G, Perlstein WM, Robinson ME. Placebo analgesia is  
38 accompanied by large reductions in pain-related brain activity in irritable bowel syndrome  
39 patients. *Pain* 2007;127(1):63-72.
- 40 [126] Price DD, Long S, Wilsey B, Rafii A. Analysis of peak magnitude and duration of analgesia  
41 produced by local anesthetics injected into sympathetic ganglia of complex regional pain  
42 syndrome patients. *Clin J Pain* 1998;14(3):216-226.
- 43 [127] Price DD, Milling LS, Kirsch I, Duff A, Montgomery GH, Nicholls SS. An analysis of factors that  
44 contribute to the magnitude of placebo analgesia in an experimental paradigm. *Pain*  
45 1999;83(2):147-156.
- 46 [128] Rainville P, Duncan GH, Price DD, Carrier B, Bushnell MC. Pain affect encoded in human  
47 anterior cingulate but not somatosensory cortex. *Science* 1997;277(5328):968-971.
- 48 [129] Rawling MJ, Wiebe ER. A randomized controlled trial of fentanyl for abortion pain. *Am J Obstet*  
49 *Gynecol* 2001;185(1):103-107.
- 50 [130] Ristikankare M, Hartikainen J, Heikkinen M, Janatuinen E, Julkunen R. Is routinely given  
51 conscious sedation of benefit during colonoscopy? *Gastrointest Endosc* 1999;49(5):566-572.
- 52 [131] Robinson R, Darlow S, Wright SJ, Watters C, Carr I, Gadsby G, Mayberry J. Is transcutaneous  
53 electrical nerve stimulation an effective analgesia during colonoscopy? *Postgrad Med J*  
54 2001;77(909):445-446.
- 55  
56  
57  
58  
59  
60

- 1  
2  
3 [132] Rowbotham MC, Davies PS, Verkempinck C, Galer BS. Lidocaine patch: double-blind controlled  
4 study of a new treatment method for post-herpetic neuralgia. *Pain* 1996;65(1):39-44.
- 5 [133] Ruoff GE, Rosenthal N, Jordan D, Karim R, Kamin M. Tramadol/Acetaminophen combination  
6 tablets for the treatment of chronic lower back pain: A multicenter, randomized, double-  
7 blind, placebo-controlled outpatient study. *Clin Ther* 2003;25(4):1123-1141.
- 8 [134] Sanders GE, Reinert O, Tepe R, Maloney P. Chiropractic adjustive manipulation on subjects  
9 with acute low back pain: visual analog pain scores and plasma beta-endorphin levels. *J*  
10 *Manipulative Physiol Ther* 1990;13(7):391-395.
- 11 [135] Scharf HP, Mansmann U, Streitberger K, Witte S, Kramer J, Maier C, Trampisch HJ, Victor N.  
12 Acupuncture and knee osteoarthritis: A three-armed randomized trial. *Ann Intern Med*  
13 2006;145(1):12-20.
- 14 [136] Scharff L, Marcus DA, Masek BJ. A Controlled Study of Minimal-Contact Thermal Biofeedback  
15 Treatment in Children With Migraine. *J Pediatr Psychol* 2002;27(2):109-119.
- 16 [137] Schnebel BE, Simmons JW. The use of oral colchicine for low-back pain. A double-blind study.  
17 *Spine (Phila Pa 1976)* 1988;13(3):354-357.
- 18 [138] Schnitzer TJ, Gray WL, Paster RZ, Kamin M. Efficacy of tramadol in treatment of chronic low  
19 back pain. *J Rheumatol* 2000;27(3):772-778.
- 20 [139] Scott DJ, Stohler CS, Egnatuk CM, Wang H, Koeppe RA, Zubieta J-K. Individual Differences in  
21 Reward Responding Explain Placebo-Induced Expectations and Effects. *Neuron*  
22 2007;55(2):325-336.
- 23 [140] Scott DJ, Stohler CS, Egnatuk CM, Wang H, Koeppe RA, Zubieta J. PLacebo and nocebo effects  
24 are defined by opposite opioid and dopaminergic responses. *Arch Gen Psychiatry*  
25 2008;65(2):220-231.
- 26 [141] Snyder-Mackler L, Barry AJ, Perkins AI, Soucek MD. Effects of helium-neon laser irradiation on  
27 skin resistance and pain in patients with trigger points in the neck or back. *Phys Ther*  
28 1989;69(5):336-341.
- 29 [142] Soriano F, Rios R. Gallium arsenide laser treatment of chronic low back pain: A prospective,  
30 randomized and double blind study. *Laser Therapy* 1998;10(4):175-180.
- 31 [143] Stransky M, Rubin A, Lava NS, Lazaro RP. Treatment of carpal tunnel syndrome with vitamin  
32 B6: a double-blind study. *South Med J* 1989;82(7):841-842.
- 33 [144] Szpalski M, Hayez JP. Objective functional assessment of the efficacy of tenoxicam in the  
34 treatment of acute low back pain. A double-blind placebo-controlled study. *Br J Rheumatol*  
35 1994;33(1):74-78.
- 36 [145] Tashjian RZ, Banerjee R, Bradley MP, Alford W, Fadale PD. Zolpidem reduces postoperative  
37 pain, fatigue, and narcotic consumption following knee arthroscopy: a prospective  
38 randomized placebo-controlled double-blinded study. *J Knee Surg* 2006;19(2):105-111.
- 39 [146] Theroux MC, West DW, Corddry DH, Hyde PM, Bachrach SJ, Cronan KM, Kettrick RG. Efficacy of  
40 intranasal midazolam in facilitating suturing of lacerations in preschool children in the  
41 emergency department. *Pediatrics* 1993;91(3):624-627.
- 42 [147] Thomas KS, Muir KR, Doherty M, Jones AC, O'Reilly SC, Bassey EJ. Home based exercise  
43 programme for knee pain and knee osteoarthritis: randomised controlled trial. *BMJ*  
44 2002;325(7367):752.
- 45 [148] Toya S, Motegi M, Inomata K, Ohshiro T, Macda T. Report on a computer-randomized double  
46 blind clinical trial to determine the effectiveness of the GaAlAs (830 nm) diode laser for pain  
47 attenuation in selected pain groups. *Laser Therapy* 1994;6:143-148.
- 48 [149] Tritrakarn T, Lertakyamanee J, Koompong P, Soontrapa S, Somprakit P, Tantiwong A, Jittapapai  
49 S. Both EMLA and Placebo Cream Reduced Pain during Extracorporeal Piezoelectric Shock  
50 Wave Lithotripsy with the Piezolith 2300. *Anesthesiology* 2000;92(4):1049-1054.
- 51 [150] Vase L, Robinson ME, Verne GN, Price DD. The contributions of suggestion, desire, and  
52 expectation to placebo effects in irritable bowel syndrome patients: An empirical  
53 investigation. *Pain* 2003;105(1-2):17-25.
- 54  
55  
56  
57  
58  
59  
60

- 1  
2  
3 [151] Vase L, Robinson ME, Verne GN, Price DD. Increased placebo analgesia over time in irritable  
4 bowel syndrome (IBS) patients is associated with desire and expectation but not  
5 endogenous opioid mechanisms. *Pain* 2005;115(3):338-347.
- 6 [152] Verne GN, Robinson ME, Vase L, Price DD. Reversal of visceral and cutaneous hyperalgesia by  
7 local rectal anesthesia in irritable bowel syndrome (IBS) patients. *Pain* 2003;105(1):223-230.
- 8 [153] Vondrackova D, Leyendecker P, Meissner W, Hopp M, Szombati I, Hermanns K, Ruckes C,  
9 Weber S, Grothe B, Fleischer W, Reimer K. Analgesic efficacy and safety of oxycodone in  
10 combination with naloxone as prolonged release tablets in patients with moderate to severe  
11 chronic pain. *The journal of pain : official journal of the American Pain Society*  
12 2008;9(12):1144-1154.
- 13 [154] Vorsanger GJ, Xiang J, Gana TJ, Pascual ML, Fleming RR. Extended-release tramadol (tramadol  
14 ER) in the treatment of chronic low back pain. *J Opioid Manag* 2008;4(2):87-97.
- 15 [155] Voudouris NJ, Peck CL, Coleman G. Conditioned placebo responses. *J Pers Soc Psychol*  
16 1985;48(1):47-53.
- 17 [156] Voudouris NJ, Peck CL, Coleman G. Conditioned response models of placebo phenomena:  
18 further support. *Pain* 1989;38(1):109-116.
- 19 [157] Voudouris NJ, Peck CL, Coleman G. The role of conditioning and verbal expectancy in the  
20 placebo response. *Pain* 1990;43(1):121-128.
- 21 [158] Wager TD, Matre D, Casey KL. Placebo effects in laser-evoked pain potentials. *Brain Behav*  
22 *Immun* 2006;20(3):219-230.
- 23 [159] Wager TD, Rilling JK, Smith EE, Sokolik A, Casey KL, Davidson RJ, Kosslyn SM, Rose RM, Cohen  
24 JD. Placebo-Induced Changes in fMRI in the Anticipation and Experience of Pain. *Science*  
25 2004;303(5661):1162-1167.
- 26 [160] Wager TD, Scott DJ, Zubieta J-K. Placebo effects on human  $\mu$ -opioid activity during pain.  
27 *Proceedings of the National Academy of Sciences* 2007;104(26):11056-11061.
- 28 [161] Walton RE, Chiappinelli J. Prophylactic penicillin: effect on posttreatment symptoms following  
29 root canal treatment of asymptomatic periapical pathosis. *J Endod* 1993;19(9):466-470.
- 30 [162] Wang B, Tang J, White PF, Naruse R, Sloninsky A, Kariger R, Gold J, Wender RH. Effect of the  
31 Intensity of Transcutaneous Acupoint Electrical Stimulation on the Postoperative Analgesic  
32 Requirement. *Anesth Analg* 1997;85(2):406-413.
- 33 [163] Watson A, El-Dereby W, Bentley DE, Vogt BA, Jones AKP. Categories of placebo response in the  
34 absence of site-specific expectation of analgesia. *Pain* 2006;126(1):115-122.
- 35 [164] Watson A, El-Dereby W, Vogt BA, Jones AKP. Placebo analgesia is not due to compliance or  
36 habituation: EEG and behavioural evidence. *Neuroreport* 2007;18(8):771-775  
37 710.1097/WNR.1090b1013e3280c1091e1092a1098.
- 38 [165] Webster LR, Butera PG, Moran LV, Wu N, Burns LH, Friedmann N. Oxytrex minimizes physical  
39 dependence while providing effective analgesia: a randomized controlled trial in low back  
40 pain. *The journal of pain : official journal of the American Pain Society* 2006;7(12):937-946.
- 41 [166] Witt C, Brinkhaus B, Jena S, Linde K, Streng A, Wagenpfeil S, Hummelsberger J, Walther HU,  
42 Melchart D, Willich SN. Acupuncture in patients with osteoarthritis of the knee: a  
43 randomised trial. *Lancet* 2005;366 136-143.
- 44 [167] Wu M-T, Sheen J-M, Chuang K-H, Yang P, Chin S-L, Tsai C-Y, Chen C-J, Liao J-R, Lai P-H, Chu K-A,  
45 Pan H-B, Yang C-F. Neuronal Specificity of Acupuncture Response: A fMRI Study with  
46 Electroacupuncture. *Neuroimage* 2002;16(4):1028-1037.
- 47 [168] Zubieta JK, Bueller JA, Jackson LR, Scott DJ, Xu Y, Koeppel RA, Nichols TE, Stohler CS. Placebo  
48 Effects Mediated by Endogenous Opioid Activity on  $\mu$ -Opioid Receptors. *The Journal of*  
49 *Neuroscience* 2005;25(34):7754-7762.
- 50 [169] Zubieta JK, Yau WY, Scott DJ, Stohler CS. Belief or Need? Accounting for individual variations in  
51 the neurochemistry of the placebo effect. *Brain Behav Immun* 2006;20(1):15-26.
- 52  
53  
54  
55  
56  
57  
58  
59  
60

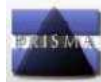

# PRISMA 2009 Checklist

| Section/topic                      | #  | Checklist item                                                                                                                                                                                                                                                                                              | Reported on page # |
|------------------------------------|----|-------------------------------------------------------------------------------------------------------------------------------------------------------------------------------------------------------------------------------------------------------------------------------------------------------------|--------------------|
| <b>TITLE</b>                       |    |                                                                                                                                                                                                                                                                                                             |                    |
| Title                              | 1  | Identify the report as a systematic review, meta-analysis, or both.                                                                                                                                                                                                                                         | n/a                |
| <b>ABSTRACT</b>                    |    |                                                                                                                                                                                                                                                                                                             |                    |
| Structured summary                 | 2  | Provide a structured summary including, as applicable: background; objectives; data sources; study eligibility criteria, participants, and interventions; study appraisal and synthesis methods; results; limitations; conclusions and implications of key findings; systematic review registration number. | n/a                |
| <b>INTRODUCTION</b>                |    |                                                                                                                                                                                                                                                                                                             |                    |
| Rationale                          | 3  | Describe the rationale for the review in the context of what is already known.                                                                                                                                                                                                                              | 3                  |
| Objectives                         | 4  | Provide an explicit statement of questions being addressed with reference to participants, interventions, comparisons, outcomes, and study design (PICOS).                                                                                                                                                  | n/a                |
| <b>METHODS</b>                     |    |                                                                                                                                                                                                                                                                                                             |                    |
| Protocol and registration          | 5  | Indicate if a review protocol exists, if and where it can be accessed (e.g., Web address), and, if available, provide registration information including registration number.                                                                                                                               | n/a                |
| Eligibility criteria               | 6  | Specify study characteristics (e.g., PICOS, length of follow-up) and report characteristics (e.g., years considered, language, publication status) used as criteria for eligibility, giving rationale.                                                                                                      | 5                  |
| Information sources                | 7  | Describe all information sources (e.g., databases with dates of coverage, contact with study authors to identify additional studies) in the search and date last searched.                                                                                                                                  | 4                  |
| Search                             | 8  | Present full electronic search strategy for at least one database, including any limits used, such that it could be repeated.                                                                                                                                                                               | n/a                |
| Study selection                    | 9  | State the process for selecting studies (i.e., screening, eligibility, included in systematic review, and, if applicable, included in the meta-analysis).                                                                                                                                                   | 4, Fig1            |
| Data collection process            | 10 | Describe method of data extraction from reports (e.g., piloted forms, independently, in duplicate) and any processes for obtaining and confirming data from investigators.                                                                                                                                  | 6                  |
| Data items                         | 11 | List and define all variables for which data were sought (e.g., PICOS, funding sources) and any assumptions and simplifications made.                                                                                                                                                                       | 6                  |
| Risk of bias in individual studies | 12 | Describe methods used for assessing risk of bias of individual studies (including specification of whether this was done at the study or outcome level), and how this information is to be used in any data synthesis.                                                                                      | n/a                |
| Summary measures                   | 13 | State the principal summary measures (e.g., risk ratio, difference in means).                                                                                                                                                                                                                               | n/a                |
| Synthesis of results               | 14 | Describe the methods of handling data and combining results of studies, if done, including measures of consistency (e.g., $I^2$ ) for each meta-analysis.                                                                                                                                                   | 6                  |



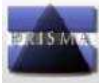

# PRISMA 2009 Checklist

| Section/topic                 | #  | Checklist item                                                                                                                                                                                           | Reported on page # |
|-------------------------------|----|----------------------------------------------------------------------------------------------------------------------------------------------------------------------------------------------------------|--------------------|
| Risk of bias across studies   | 15 | Specify any assessment of risk of bias that may affect the cumulative evidence (e.g., publication bias, selective reporting within studies).                                                             | n/a                |
| Additional analyses           | 16 | Describe methods of additional analyses (e.g., sensitivity or subgroup analyses, meta-regression), if done, indicating which were pre-specified.                                                         | n/a                |
| <b>RESULTS</b>                |    |                                                                                                                                                                                                          |                    |
| Study selection               | 17 | Give numbers of studies screened, assessed for eligibility, and included in the review, with reasons for exclusions at each stage, ideally with a flow diagram.                                          | Fig1               |
| Study characteristics         | 18 | For each study, present characteristics for which data were extracted (e.g., study size, PICOS, follow-up period) and provide the citations.                                                             | n/a                |
| Risk of bias within studies   | 19 | Present data on risk of bias of each study and, if available, any outcome level assessment (see item 12).                                                                                                | n/a                |
| Results of individual studies | 20 | For all outcomes considered (benefits or harms), present, for each study: (a) simple summary data for each intervention group (b) effect estimates and confidence intervals, ideally with a forest plot. | n/a                |
| Synthesis of results          | 21 | Present results of each meta-analysis done, including confidence intervals and measures of consistency.                                                                                                  | n/a                |
| Risk of bias across studies   | 22 | Present results of any assessment of risk of bias across studies (see Item 15).                                                                                                                          | n/a                |
| Additional analysis           | 23 | Give results of additional analyses, if done (e.g., sensitivity or subgroup analyses, meta-regression [see Item 16]).                                                                                    | n/a                |
| <b>DISCUSSION</b>             |    |                                                                                                                                                                                                          |                    |
| Summary of evidence           | 24 | Summarize the main findings including the strength of evidence for each main outcome; consider their relevance to key groups (e.g., healthcare providers, users, and policy makers).                     | 21                 |
| Limitations                   | 25 | Discuss limitations at study and outcome level (e.g., risk of bias), and at review-level (e.g., incomplete retrieval of identified research, reporting bias).                                            | 22-3               |
| Conclusions                   | 26 | Provide a general interpretation of the results in the context of other evidence, and implications for future research.                                                                                  | 22-3               |
| <b>FUNDING</b>                |    |                                                                                                                                                                                                          |                    |
| Funding                       | 27 | Describe sources of funding for the systematic review and other support (e.g., supply of data); role of funders for the systematic review.                                                               | 1                  |

From: Moher D, Liberati A, Tetzlaff J, Altman DG, The PRISMA Group (2009). Preferred Reporting Items for Systematic Reviews and Meta-Analyses: The PRISMA Statement. PLoS Med 6(7): e1000097. doi:10.1371/journal.pmed1000097

For more information, visit: [www.prisma-statement.org](http://www.prisma-statement.org).

# BMJ Open

## What Techniques Might be Used to Harness Placebo Effects in Non-Malignant Pain? A Literature Review and Survey to Develop a Taxonomy.

|                                 |                                                                                                                                                                                                                                                                                                                                                                                                                                                                                                                                                        |
|---------------------------------|--------------------------------------------------------------------------------------------------------------------------------------------------------------------------------------------------------------------------------------------------------------------------------------------------------------------------------------------------------------------------------------------------------------------------------------------------------------------------------------------------------------------------------------------------------|
| Journal:                        | <i>BMJ Open</i>                                                                                                                                                                                                                                                                                                                                                                                                                                                                                                                                        |
| Manuscript ID                   | bmjopen-2016-015516.R1                                                                                                                                                                                                                                                                                                                                                                                                                                                                                                                                 |
| Article Type:                   | Research                                                                                                                                                                                                                                                                                                                                                                                                                                                                                                                                               |
| Date Submitted by the Author:   | 15-Mar-2017                                                                                                                                                                                                                                                                                                                                                                                                                                                                                                                                            |
| Complete List of Authors:       | Bishop, Felicity; University of Southampton, Psychology<br>Coghlan, Beverly; University of Southampton<br>Geraghty, Adam; University of Southampton, Primary Care and Population Sciences<br>Everitt, Hazel; University of Southampton, Primary Care and Population Sciences, Faculty of Medicine<br>Little, Paul; University of Southampton, Primary Care and Population Science;<br>Holmes, Michelle; University of Southampton, Psychology<br>Seretis, Dionysis; University of Southampton, Psychology<br>Lewith, George; University of Southampton |
| <b>Primary Subject Heading</b>: | Complementary medicine                                                                                                                                                                                                                                                                                                                                                                                                                                                                                                                                 |
| Secondary Subject Heading:      | General practice / Family practice, Research methods, Rheumatology, Rehabilitation medicine                                                                                                                                                                                                                                                                                                                                                                                                                                                            |
| Keywords:                       | placebos, placebo effect, nocebo effect, translational research, review, classification                                                                                                                                                                                                                                                                                                                                                                                                                                                                |
|                                 |                                                                                                                                                                                                                                                                                                                                                                                                                                                                                                                                                        |

SCHOLARONE™  
Manuscripts

1  
2  
3  
4  
5 **1 What Techniques Might be Used to Harness Placebo Effects in Non-**  
6 **2 Malignant Pain? A Literature Review and Survey to Develop a**  
7 **3 Taxonomy.**  
8  
9  
10  
11  
12

13 Running head: Taxonomy of techniques to harness placebo effects  
14

15 Authors: Felicity L Bishop PhD <sup>a,b</sup>, Beverly Coghlan MSc <sup>b</sup>, Adam WA Geraghty PhD <sup>b</sup>, Hazel Everitt  
16 PhD <sup>b</sup>, Paul Little FMedSci <sup>b</sup>, Michelle M Holmes MRes <sup>a</sup>, Dionysis Seretis MRes <sup>a</sup>, George Lewith  
17 MRCGP <sup>b</sup>  
18  
19

20  
21 a. Department of Psychology, Faculty of Social Human and Mathematical Sciences, Building 44  
22 Highfield Campus, University of Southampton, Southampton SO17 1BJ United Kingdom.  
23

24 b. Primary Care and Population Sciences, Aldermoor Health Centre, University of Southampton,  
25 Southampton, SO16 5ST, United Kingdom.  
26  
27

28  
29 Emails: Felicity Bishop: [F.L.Bishop@southampton.ac.uk](mailto:F.L.Bishop@southampton.ac.uk); Beverly Coghlan:  
30 [beverly101@btinternet.com](mailto:beverly101@btinternet.com); Adam Geraghty: [A.W.Geraghty@soton.ac.uk](mailto:A.W.Geraghty@soton.ac.uk); Hazel Everitt:  
31 [H.A.Everitt@soton.ac.uk](mailto:H.A.Everitt@soton.ac.uk); Paul Little: [P.Little@soton.ac.uk](mailto:P.Little@soton.ac.uk); Michelle Holmes:  
32 [M.M.Holmes@soton.ac.uk](mailto:M.M.Holmes@soton.ac.uk); Dionysis Seretis: [ds2g14@soton.ac.uk](mailto:ds2g14@soton.ac.uk); George Lewith: [gl3@soton.ac.uk](mailto:gl3@soton.ac.uk).  
33  
34  
35

36  
37 Corresponding author: Felicity L Bishop. Email: [F.L.Bishop@southampton.ac.uk](mailto:F.L.Bishop@southampton.ac.uk). Phone: +44 (0)23  
38 8059 9020. Fax: +44 (0)23 8059 4597. Psychology, Faculty of Social and Human Sciences, Building  
39 44 Highfield Campus, University of Southampton, Southampton SO17 1BJ United Kingdom.  
40  
41  
42

43  
44  
45  
46  
47  
48  
49  
50  
51  
52  
53  
54  
55  
56  
57  
58  
59  
60

21

1  
2  
3 22**Abstract**

4  
5  
6 23 Objectives. Placebo effects can be clinically meaningful but are seldom fully exploited in clinical  
7  
8 24 practice. This review aimed to facilitate translational research by producing a taxonomy of  
9  
10 25 applicable techniques that could augment placebo analgesia in clinical practice.

11  
12  
13 26 Design. Literature review and survey.

14  
15  
16 27 Methods. We systematically analysed methods which could plausibly be used to elicit placebo  
17  
18 28 effects in 169 clinical and laboratory-based studies involving non-malignant pain, drawn from 7  
19  
20 29 systematic reviews. In a validation exercise we surveyed 33 leading placebo researchers (M=12  
21  
22 30 years' research experience, SD=9.8), who were asked to comment on and add to the draft taxonomy  
23  
24 31 derived from the literature.

25  
26  
27 32 Results. The final taxonomy defines 30 procedures that may contribute to placebo effects in clinical  
28  
29 33 and experimental research, proposes 60 possible clinical applications, and classifies procedures into  
30  
31 34 5 domains: the *Patient's Characteristics and Belief* (5 procedures and 11 clinical applications); the  
32  
33 35 *Practitioner's Characteristics and Beliefs* (2 procedures and 4 clinical applications); the *Healthcare*  
34  
35 36 *Setting* (8 procedures and 13 clinical applications); *Treatment Characteristics* (8 procedures and 14  
36  
37 37 clinical applications); and the *Patient-Practitioner Interaction* (7 procedures and 18 clinical  
38  
39 38 applications).

40  
41 39 Conclusions. The taxonomy provides a preliminary and novel tool with potential to guide  
42  
43 40 translational research aiming to harness placebo effects for patient benefit in practice.

44  
45 41 Keywords: placebos; placebo effect; nocebo effect; translational research; review; classification  
46  
47 42

48  
49  
50  
51  
52  
53  
54  
55  
56  
57  
58  
59  
60

## Article Summary

### Strengths and Limitations of this Study

- This is a novel attempt to use existing studies to conceptualise the factors that might contribute to placebo effects and the associated procedures that could be simply and ethically adapted for clinical practice, subject to further testing .
- We drew on both clinical trials and laboratory-based studies of placebo effects, in order to generate a more comprehensive list of factors that might contribute to placebo effects than would be possible by relying on just one literature.
- A systematic approach to data synthesis, based on qualitative research methods, was used to identify and classify procedures that might contribute to placebo effects in clinical trials.
- The development of the taxonomy did not incorporate very recent placebo trials or studies and the selection of reviews used to determine which original studies to include in the development process was somewhat arbitrary.
- Our taxonomy is presented not as an exhaustive compilation of current methods used in placebo research but as a detailed and systematic guide for future research, which can in turn further refine the taxonomy.

## Introduction

There is compelling evidence that factors other than the so-called active components of treatment can have clinically meaningful effects on symptoms, particularly non-malignant pain<sup>1-4</sup>. Such 'placebo effects' can be defined as the physiological and/or psychological changes that result from the meaning derived by a person in a health care setting<sup>5,6</sup>. From a learning perspective, expectations play a key role in placebo effects.<sup>7</sup> These effects may be as large as treatment effects<sup>8</sup> and occur throughout medicine, especially when doctors and patients interact with each other. They are not routinely deliberately harnessed for patient benefit in clinical practice<sup>9</sup>, possibly because doctors often assume they must deceive patients in order to elicit placebo effects<sup>10,11</sup>. However, this assumption is mistaken because it is not necessary to prescribe placebos in order to elicit placebo effects. For example, the overall analgesic effect of an opioid derives not only from its specific pharmaceutical actions but also from its psychological components, i.e. the *expectations* and *meaning* that the patient derives when consulting the doctor and taking the medicine<sup>12,13</sup>. The same is true for other types of intervention including physical, surgical, and psychotherapies. One approach that has received initial support is for doctors to use positive suggestion to enhance patients' expectations of benefit<sup>4</sup>. Furthermore, preliminary evidence suggests that openly prescribing placebos might elicit clinically meaningful placebo effects in IBS and depression<sup>14,15</sup> although this approach entails its own set of ethical challenges<sup>16,17</sup>.

Placebo researchers have both begun and called for more translational research in this field<sup>11,18-20</sup>. Such work has thus far typically focused on ethical considerations and narrative approaches to drawing out implications for clinical practice from the placebo literature. We suggest a systematic approach to translational research might be helpful. Many techniques and procedures contribute to placebo effects and could potentially be simply and ethically adapted for clinical practice, subject to further testing in practice settings<sup>21</sup>. In order to identify and describe such techniques, and thus

1  
2  
3 85 provide some direction for future research, we reviewed experimental and clinical studies of placebo  
4  
5 86 effects in non-malignant pain. We focused on non-malignant pain because it can be difficult to  
6  
7 87 manage (particularly with current concerns about opioids<sup>22</sup>), the mechanisms underpinning placebo  
8  
9 88 analgesia are reasonably well understood<sup>23</sup>, laboratory-based experimental studies often focus on  
10  
11 89 placebo analgesia, and patients with pain have been shown to display substantial and clinically  
12  
13 90 significant placebo effects<sup>1</sup>. The aim of this project was to facilitate translational research by  
14  
15 91 producing a taxonomy of techniques that may contribute to observed placebo effects in research  
16  
17 92 settings and could be studied in future as potential approaches to augmenting placebo  
18  
19 93 enhancement of analgesia in clinical practice.  
20  
21  
22  
23  
24  
25

## 26 95 **Methods**

### 27 28 29 30 97 **Literature Search**

31  
32 98 We selected seven systematic reviews of different aspects of the placebo literature, chosen from  
33  
34 99 recent reviews available at the time (2012) and based on expert opinion (within the research team)  
35  
36 100 to enable the extraction of information on placebo procedures from a broad range of settings -  
37  
38 101 comprehensive reviews<sup>24-26</sup>, reviews of placebo effects in clinical populations<sup>2 27</sup> and reviews of  
39  
40 102 laboratory-based experimental placebo studies<sup>28 29</sup>. The key consideration was that together this  
41  
42 103 collection of reviews should cite a diverse set of studies likely to be using diverse methods to directly  
43  
44 104 (e.g. placebo mechanisms studies) or indirectly (e.g. clinical trials with placebo controls) study  
45  
46 105 placebo effects. After removing duplicates and ineligible studies (see Figure 1), 169 studies were  
47  
48 106 used to develop the taxonomy (for list of included studies see Supplementary Digital Content).  
49  
50  
51  
52  
53  
54  
55  
56  
57  
58  
59  
60

1  
2  
3 108  
4  
5  
6 109  
7  
8  
9 110  
10

11 Studies were eligible for inclusion if they: reported original research in which some participants  
12 received a placebo intervention, were published since 1983, published in English language, reported  
13 a non-malignant pain outcome. Studies were excluded if they: were published before 1983 (because  
14 (a) means of generating context-dependent placebo effects may be sensitive to social and cultural  
15 changes over time, e.g. patient preferences for particular communication styles and thus their  
16 effectiveness in modifying expectations may have changed over time and (b) this yielded a  
17 manageable number of papers to analyse which had been published during the 30 years preceding  
18 this analysis); or examined any type of psychotherapeutic interventions (because it is difficult to  
19 disentangle the active components of psychotherapy from the effect of the meaning of the  
20 intervention<sup>30</sup>).

21  
22  
23  
24  
25  
26  
27  
28  
29  
30  
31  
32  
33  
34 121  
35

### 36 122 **Data Extraction and Synthesis**

37 123 Descriptions of all events that occurred in the placebo groups during each of the 169 studies (e.g.  
38 124 medical, administrative, and ethical procedures) were extracted into a piloted form by one author  
39 125 and checked by a second. These events were reviewed for duplication and overlap. This resulted in  
40 126 an initial list of 43 procedures that might contribute to placebo effects (e.g. informed consent  
41 127 processes, taking placebo pills, conditioning protocols). Study authors were not contacted for  
42 128 further information about method used.

43  
44  
45  
46  
47  
48  
49  
50  
51  
52 129  
53  
54

55 130 To synthesise the data and develop our taxonomy we used systematic and rigorous methods derived  
56 131 from qualitative research. We began with a deductive analysis, which aimed to categorise the



1  
2  
3 132 procedures in a way that is intuitively appealing, accessible, and clinically relevant by sorting them  
4  
5 133 into five previously-identified contextual domains of healthcare: patients' characteristics/beliefs,  
6  
7 134 practitioners' characteristics/beliefs, practitioner-patient relationship, superficial treatment  
8  
9 135 characteristics, and the healthcare environment<sup>31</sup>. Two authors (BC, FB) performed the initial  
10  
11 136 categorisation which was then reviewed in detail by three other authors (GL, HE, AG). We then  
12  
13 137 engaged in a constant comparative analysis, a technique that originates in grounded theory<sup>32</sup>. The  
14  
15 138 aim of this part of the analysis was to consolidate the list of procedures and ensure that we only  
16  
17 139 retained those that were distinct from each other. Procedures and examples of their use were all  
18  
19 140 systematically compared to each other; similar procedures were then merged and all procedures  
20  
21 141 were classified into one of the five domains. Two authors (BC, FB) led this work and presented initial  
22  
23 142 findings to the rest of the team for discussion. All authors discussed and agreed on which  
24  
25 143 procedures to merge, which to retain, and how to classify them. During this process, the definitions  
26  
27 144 of the five domains were iteratively modified in order to reduce ambiguity over which procedures  
28  
29 145 should be classified into which domain. . This resulted in a more parsimonious list of 29 procedures  
30  
31 146 classified by domain. All authors discussed and agreed on the final classification of these procedures.  
32  
33 147 These 29 procedures were then critically examined to ensure they were theoretically plausible  
34  
35 148 means of producing placebo effects. We focused on three core psychological mechanisms<sup>25 33-36</sup>:  
36  
37 149 response expectancy<sup>37</sup>; conditioning and social learning<sup>7</sup>; and affect, including motivation and  
38  
39 150 anxiety-reduction<sup>24 38</sup>. However, we acknowledge that these mechanisms are difficult to tease apart  
40  
41 151<sup>39</sup> and that alternative mechanisms have been proposed<sup>6</sup> and so we erred on the side of inclusivity.  
42  
43 152 Neurobiological mechanisms of placebo analgesia have been described<sup>23 40</sup> but a detailed  
44  
45 153 consideration of how these might apply to the procedures in the taxonomy would be highly  
46  
47 154 speculative and was beyond the scope of this project (for discussion of clinical applications of the  
48  
49 155 neuroscience of placebo effects see<sup>41</sup>). Four authors (FB, BC, AG, GL) reviewed all procedures and  
50  
51 156 considered the extent to which each procedure could plausibly produce placebo effects via one or  
52  
53 157 more of the three core psychological mechanisms. Initial findings were shared with the remaining  
54  
55  
56  
57  
58  
59  
60

1  
2  
3 158 authors and consensus was reached through discussion. Four procedures deemed very unlikely to  
4  
5 159 produce placebo effects (Conveying a Neutral Therapeutic Message; Randomisation; Blinding;  
6  
7 160 Deception) were excluded, leaving 25 procedures that might plausibly contribute to placebo effects.  
8  
9 161 The multidisciplinary team of authors then generated possible clinical applications of each of these  
10  
11 162 25 procedures.  
12  
13  
14  
15 163

### 164 **Validating the Taxonomy**

165 To ensure our taxonomy was comprehensive we surveyed leading placebo researchers (authors of  
166 major publications on placebo effects, attendees at an international symposium on placebo effects,  
167 and GPs with an interest in placebo effects). These researchers were identified from the systematic  
168 reviews and their references used to develop the taxonomy; the list of attendees at Beyond The  
169 Placebo: Biomedical Clinical and Philosophical Aspects of the Placebo Effect, held in Ascona  
170 Switzerland, August 2012; and GPs within the National Institute for Health Research School for  
171 Primary Care Research. Ethical approval for the survey was obtained from the host institution  
172 (reference: 4741). Completed electronic surveys including informed consent were received from 33  
173 researchers (52% response rate) experienced in placebo research (M=12 years' experience, SD=9.8).  
174 Respondents were shown our draft taxonomy and asked whether, for each domain, they knew of  
175 any other procedures that could elicit placebo responses. The proportion answering yes ranged  
176 from 22% (Healthcare Setting domain) to 50% (Superficial Treatment Characteristics domain).  
177 Respondents suggested 85 additions which were screened against existing procedures and for  
178 theoretical plausibility: 80 of the suggested additions were extra details or suggested clinical  
179 applications of existing procedures; five were new and distinct plausible procedures that were added  
180 to the taxonomy, giving a final total of 30 procedures.  
181  
182 Because of our orientation to clinical applications, we have chosen to use clinically-oriented  
terminology throughout the taxonomy. However, it is important to note that when used in relation

1  
2  
3 183 to procedures identified from the literature these terms also relate to the experimental equivalent,  
4  
5 184 such that “patient” also refers to subject/participant, “practitioner” also refers to experimenter, and  
6  
7 185 “intervention” also refers to experimental condition.  
8  
9

## 10 186 **Analysis**

11  
12 187 The use of each of the 30 procedures in the taxonomy was assessed across all 169 studies in the  
13  
14 188 review. Two authors independently rated the presence of each procedure in each study (Kappa =  
15  
16 189 0.93, discrepancies were resolved through discussion).  
17  
18  
19  
20  
21  
22

190

191

## 191 **Results**

22  
23  
24  
25 192 The taxonomy defines 30 procedures that may contribute to placebo effects observed in clinical and  
26  
27 193 experimental research, and classifies them into 5 domains. Table 1 presents the main taxonomy,  
28  
29 194 listing and defining all 30 procedures within 5 domains. Table 2 suggests clinical applications of each  
30  
31 195 procedure. Table 3 shows the frequency of use of each procedure in clinical and experimental  
32  
33 196 studies, and is intended as both an approximate guide to whether the procedures derived primarily  
34  
35 197 from one or other literature and as a means to highlight those procedures that are very common  
36  
37 198 and very rare in the literature. Below we describe the procedures within each domain in turn.  
38  
39  
40  
41  
42  
43  
44  
45  
46  
47  
48  
49  
50  
51  
52  
53  
54  
55  
56  
57  
58  
59  
60

199 Table 1. Taxonomy of Procedures Which Could Plausibly Elicit Placebo Effects in Non-Malignant Pain

| Procedure Derived from Literature                                             | Definition and Use in Research Studies                                                                                                                                                                                                                           |
|-------------------------------------------------------------------------------|------------------------------------------------------------------------------------------------------------------------------------------------------------------------------------------------------------------------------------------------------------------|
| <b>The Patient's Beliefs and Characteristics</b>                              |                                                                                                                                                                                                                                                                  |
| 1. Select Patients Based on Treatment History.                                | Screen and select patients (or subgroups) against inclusion criteria related to issues such as medical/treatment history, e.g. naive to intervention being tested (not just contraindications).                                                                  |
| 2. Create Positive Expectancy.                                                | Deliberately and explicitly suggest to patients that the intervention will be effective for them (not as part of informed consent process).                                                                                                                      |
| 3. Reduce Negative Expectancy. <sup>a</sup>                                   | The potentially negative or harmful procedures and characteristics of the treatment are deliberately minimised in information for patients.                                                                                                                      |
| 4. Convey a Positive Therapeutic Message through Informed Consent Procedures. | Convey (verbally or in writing) a positive therapeutic message through the content of informed consent. The message might be explicit (e.g. "this intervention is usually effective in most people") or implicit (e.g. "this treatment is an antihypertensive"). |
| 5. Harness Socio-cultural Context. <sup>a</sup>                               | Tailor the intervention according to the patient's social and cultural context and history.                                                                                                                                                                      |
| <b>The Practitioner's Beliefs and Characteristics</b>                         |                                                                                                                                                                                                                                                                  |
| 6. Practitioner Expectancy.                                                   | The person delivering the treatment expects it to be effective for the patient.                                                                                                                                                                                  |
| 7. Practitioner's Personal Characteristics.                                   | The practitioner's personal and/or professional characteristics (e.g. status) are modified (through selecting practitioners with different characteristics) and/or emphasised to patients.                                                                       |
| <b>The Healthcare Setting</b>                                                 |                                                                                                                                                                                                                                                                  |
| 8. Active Recruitment.                                                        | Actively seek out and recruit patients (e.g. advertising for specific types of patients, writing personally to individual eligible patients identified through medical records).                                                                                 |
| 9. Active Retention.                                                          | Make patients feel valued by attempting to keep them in a study (e.g. contact patients if they miss an appointment, incentivise attendance through monetary or non-monetary gifts).                                                                              |
| 10. Follow-up.                                                                | Assess patients after the intervention/experiment to assess long-term maintenance or changes in effects over at least 6 months.                                                                                                                                  |
| 11. Follow a Standardised Protocol.                                           | The intervention is delivered according to a set, scientifically-derived, protocol, lending credibility to the intervention (and is therefore not individualised for each patient).                                                                              |
| 12. Ethical Oversight.                                                        | Study practices and procedures are explicitly regulated and monitored by an institutional ethics committee, lending credibility to the intervention.                                                                                                             |
| 13. Participating in Research.                                                | Patients know that they are part of research and contributing to the furthering of human knowledge and/or improvement of healthcare for future patients.                                                                                                         |
| 14. Symptom Monitoring.                                                       | Monitor patients' symptoms using self-report measures, practitioner assessment, or objective measures                                                                                                                                                            |

|                                                 |                                                                                                                                                                                                                       |
|-------------------------------------------------|-----------------------------------------------------------------------------------------------------------------------------------------------------------------------------------------------------------------------|
| 15. Enhanced Environment. <sup>a</sup>          | repeated over time at least twice; patients are aware of the resulting measurements.<br>The physical and interpersonal environment where the intervention is delivered is deliberately enhanced.                      |
| <b>Treatment Characteristics</b>                |                                                                                                                                                                                                                       |
| 16. Sham Intervention – Medication.             | An inert substance is administered which is manufactured to appear identical to an active medication (e.g. sugar pill, saline IV, topical agent).                                                                     |
| 17. Sham Interventions – Physical.              | A sham physical intervention is administered which is designed to appear identical to the genuine intervention (e.g. de-activated TENS, non-penetrative acupuncture needles at non-acupuncture points).               |
| 18. Sham Interventions – Attention Only.        | Patients receive study-specific attention in terms of numbers of visits and time spent with study staff but no additional intervention.                                                                               |
| 19. Ineffective substances. <sup>a</sup>        | Products unlikely to be effective or not indicated are administered (e.g. vitamins in the absence of vitamin deficiency).                                                                                             |
| 20. Use Salient Side-Effects.                   | Potential side-effects are highlighted such that the patient can interpret them as evidence of a potent intervention.                                                                                                 |
| 21. Matched Treatments.                         | To secure blinding, placebo/sham treatments are matched to 'real' treatments (e.g. on mode of administration, dosage, frequency of administration, visual appearance, taste, smell, individual titration procedures). |
| 22. Maximised Treatment Procedures.             | The procedures and characteristics of the treatment are exaggerated, e.g. through high dose, use of colour, high frequency, large pill size, lengthy duration of intervention, ritualistic administration.            |
| 23. Conditioning.                               | A desired response (e.g. pain relief) is paired with an intervention stimulus (e.g. placebo cream) so that the patient associates the response with the stimulus.                                                     |
| <b>The Patient-Practitioner Interaction</b>     |                                                                                                                                                                                                                       |
| 24. The Process of Informed Consent.            | The patient's formal written and/or verbal informed consent is discussed and obtained.                                                                                                                                |
| 25. Detailed History.                           | A detailed personal and/or medical and/or psychosocial history is obtained from the patient.                                                                                                                          |
| 26. Diagnosis/tests.                            | Additional tests, examinations, or confirmatory diagnostic procedures are undertaken to establish eligibility for the study.                                                                                          |
| 27. Care.                                       | The practitioner deliberately engages the patient with warmth, compassion and empathy.                                                                                                                                |
| 28. Patient-Centred Communication. <sup>a</sup> | The practitioner adopts a style of consultation that they consider to be appropriate for a particular patient.                                                                                                        |
| 29. Extra Attention.                            | The patient receives extra attention from being in the study, for example is seen more frequently or for longer than usual.                                                                                           |
| 30. Continuity of Care.                         | Efforts are made for the same practitioner to see the same patient at each contact.                                                                                                                                   |

200 <sup>a</sup> procedures added following survey of researchers.

201 Table 2. Suggested Potential Clinical Applications of Procedures to Elicit Placebo Effects in Non-  
 202 Malignant Pain, Subject to Further Research

203

| Procedure                                                                     | Suggested Clinical Applications                                                                                                                                                                                                                                                            |
|-------------------------------------------------------------------------------|--------------------------------------------------------------------------------------------------------------------------------------------------------------------------------------------------------------------------------------------------------------------------------------------|
| <b>The Patient's Beliefs and Characteristics</b>                              |                                                                                                                                                                                                                                                                                            |
| 1. Select Patients Based on Treatment History.                                | Stop prescribing interventions of a type that a patient has previously not responded to (e.g. tablets); instead, prescribe a different, new, type of treatment (e.g. psychological therapy).                                                                                               |
| 2. Create Positive Expectancy.                                                | Tell the patient the intervention is likely to be effective.<br>Elicit patients' treatment and illness beliefs and expectations, and dispel any misconceptions.<br>Empower patients to self-care.                                                                                          |
| 3. Reduce Negative Expectancy.                                                | Limit emphasis on major potential side effects, and describe how uncommon they are.<br>Hide cessation of analgesia administration (e.g. as in Benedetti <sup>42</sup> ), after obtaining advanced consent and ensuring patients are aware they can request additional analgesia if needed. |
| 4. Convey a Positive Therapeutic Message through Informed Consent Procedures. | Provide written and/or verbal information that conveys a positive therapeutic message about treatment.<br>Provide clear rationale for treatment.<br>Provide patient testimonials and supporting literature/media.                                                                          |
| 5. Harness Socio-cultural Context.                                            | Elicit patients' culturally embedded treatment and illness beliefs, preferences and expectations, dispelling any potentially harmful misconceptions.<br>Involve significant others in care.                                                                                                |
| <b>The Practitioner's Beliefs and Characteristics</b>                         |                                                                                                                                                                                                                                                                                            |
| 6. Practitioner Expectancy.                                                   | Only prescribe a treatment to patients when the practitioner expects it will be effective; communicate that expectation to patients.                                                                                                                                                       |
| 7. Practitioner's Personal Characteristics.                                   | Honour patient preferences for particular practitioners.<br>Use indicators of expertise/high status in offices, in correspondence, and when referring to other practitioners.<br>Ensure the patient is seen by a practitioner whose views/values are congruent with the patient's.         |
| <b>The Healthcare Setting</b>                                                 |                                                                                                                                                                                                                                                                                            |
| 8. Active Recruitment.                                                        | Actively seek out patients and invite them to attend clinic regarding a particular intervention (as opposed to waiting for patients to present).                                                                                                                                           |
| 9. Active Retention.                                                          | Personally contact patients if they miss an appointment.<br>Use incentives to encourage patients to keep appointments.                                                                                                                                                                     |
| 10. Follow-up.                                                                | Routinely invite patients to book a follow up appointment after an intervention has finished and prior to repeat prescription.<br>Encourage the patient to take responsibility for and self-manage their condition following an intervention.                                              |
| 11. Follow a Standardised Protocol.                                           | Use patient-friendly treatment protocols and share with patients where they fit in that protocol.                                                                                                                                                                                          |

|                                |                                                                                                                                                                                                                             |
|--------------------------------|-----------------------------------------------------------------------------------------------------------------------------------------------------------------------------------------------------------------------------|
| 12. Ethical Oversight.         | Ensure that patients understand that their treatment protocol is sanctioned by a higher authority e.g. NICE.                                                                                                                |
| 13. Participating in Research. | Inform patients that all outcomes and practitioner performance is audited and can contribute to improved knowledge and treatment for future patients.                                                                       |
| 14. Symptom Monitoring.        | Ask patients to monitor their symptoms regularly, for example using email, phone apps, web-based systems, paper forms.<br>Assess treatment outcome.<br>Give patients feedback on symptom improvements following monitoring. |
| 15. Enhanced Environment.      | Ensure that the environment is professional, pleasant and peaceful.<br>Employ friendly and helpful support staff.                                                                                                           |

### Treatment Characteristics

|                                          |                                                                                                                                                                                                                                                                                                                            |
|------------------------------------------|----------------------------------------------------------------------------------------------------------------------------------------------------------------------------------------------------------------------------------------------------------------------------------------------------------------------------|
| 16. Sham Intervention – Medication.      | Openly prescribe sham medication.<br>With advanced prior consent, prescribe sham medication.                                                                                                                                                                                                                               |
| 17. Sham Interventions – Physical.       | Openly prescribe sham physical treatments.<br>With advanced prior consent, prescribe sham physical treatments.                                                                                                                                                                                                             |
| 18. Sham Interventions – Attention Only. | Increase frequency and duration of consultations.                                                                                                                                                                                                                                                                          |
| 19. Ineffective substances.              | Prescribe substances that are likely not to cause harm but not clearly indicated or substances unlikely to be effective e.g. simple linctus.                                                                                                                                                                               |
| 20. Use Side-Effects.                    | Tell patients about side effects associated with positive clinical outcome.                                                                                                                                                                                                                                                |
| 21. Matched treatments.                  | Design appearance of prescribed substance (e.g. colour, packaging, taste) to match known effective treatments.                                                                                                                                                                                                             |
| 22. Maximised treatment procedures.      | Within safety limits prescribe higher dose/higher frequency/larger pill.<br>Use different colour treatments.<br>Instigate ritualistic procedures patients can perform when taking medicines.<br>Maximise adherence to treatment through education, easy follow up appointments, easy repeat prescription arrangements etc. |
| 23. Conditioning.                        | Prescribe highest tolerated dose first, then titrate downwards.<br>With consent, begin with active intervention, pair with a seemingly identical placebo then substitute for placebo alone.(e.g. as in Sandler <sup>43</sup> )                                                                                             |

### The Patient-Practitioner Interaction

|                                      |                                                                                                                                                                                                                       |
|--------------------------------------|-----------------------------------------------------------------------------------------------------------------------------------------------------------------------------------------------------------------------|
| 24. The Process of Informed Consent. | Actively seek patient consent.<br>Provide treatment options and encourage the patient to choose from these options if they so desire.                                                                                 |
| 25. Detailed History.                | Take a detailed medical and psychosocial history/update.<br>Ensure the patient feels listened to, e.g. through non-verbal communication and/or capturing information.<br>Ask questions about the meaning of symptoms. |
| 26. Diagnosis/tests.                 | Provide a definitive/confident diagnosis.<br>Examine the patient fully.                                                                                                                                               |
| 27. Care.                            | Allow patient adequate time to tell their story and listen to them.<br>Validate the patient's concerns.<br>Use non-verbal techniques to convey empathy, compassion, warmth.<br>Use touch judiciously.                 |

|                                    |                                                                                                                                                                                                                                             |
|------------------------------------|---------------------------------------------------------------------------------------------------------------------------------------------------------------------------------------------------------------------------------------------|
| 28. Patient-Centred Communication. | Individualise consultation style according to a patient's preference e.g. collaborative vs authoritative.<br>Engage in collaborative decision-making with the patient.<br>Develop shared treatment goals that you and the patient agree on. |
| 29. Extra Attention.               | Give extra attention to or show more interest in a patient by seeing them more frequently, having longer consultations or visiting at home.<br>Do not rush the patient.                                                                     |
| 30. Continuity of Care.            | Ensure patient is cared for by the same practitioner.<br>Read records before consultation.                                                                                                                                                  |

204 Note. Suggestions for clinical applications pending research into effectiveness and ethical  
205 acceptability in clinical settings.

For peer review only



206 Table 3. Use of Procedures in Placebo Groups of Clinical and Experimental Studies

| Procedure                                                                    | % of studies that used each procedure: |                  |
|------------------------------------------------------------------------------|----------------------------------------|------------------|
|                                                                              | Experimental (n=58)                    | Clinical (n=111) |
| <b>The Patient's Beliefs and Characteristics</b>                             |                                        |                  |
| 1. Select Intervention Based on Patient's Treatment History.                 | 55%                                    | 75%              |
| 2. Create Positive Expectancy.                                               | 76%                                    | 5%               |
| 3. Reduce Negative Expectancy.                                               | 3%                                     | 0%               |
| 4. Convey a Positive Therapeutic Message through Informed Consent Procedures | 43%                                    | 1%               |
| 5. Harness Socio-cultural Context.                                           | 0%                                     | 0%               |
| <b>The Practitioner's Beliefs and Characteristics</b>                        |                                        |                  |
| 6. Practitioner Expectancy.                                                  | 0%                                     | 1%               |
| 7. Practitioner's Personal Characteristics.                                  | 9%                                     | 0%               |
| <b>The Healthcare Setting</b>                                                |                                        |                  |
| 8. Active Recruitment.                                                       | 14%                                    | 16%              |
| 9. Active Retention.                                                         | 3%                                     | 2%               |
| 10. Follow-up.                                                               | 2%                                     | 16%              |
| 11. Follow a Standardised Protocol.                                          | 85%                                    | 63%              |
| 12. Ethical Oversight.                                                       | 78%                                    | 69%              |
| 13. Participating in Research.                                               | 86%                                    | 84%              |
| 14. Symptom Monitoring.                                                      | 95%                                    | 89%              |
| 15. Enhanced Environment.                                                    | 5%                                     | 0%               |
| <b>Treatment Characteristics</b>                                             |                                        |                  |
| 16. Sham Intervention – Medication.                                          | 71%                                    | 55%              |
| 17. Sham Interventions – Physical.                                           | 33%                                    | 41%              |
| 18. Sham Interventions – Attention Only.                                     | 2%                                     | 5%               |
| 19. Ineffective substances.                                                  | 0%                                     | 1%               |
| 20. Use Side-Effects.                                                        | 0%                                     | 1%               |
| 21. Matched treatments.                                                      | 40%                                    | 82%              |
| 22. Maximised treatment procedures.                                          | 22%                                    | 3%               |
| 23. Conditioning.                                                            | 41%                                    | 0%               |
| <b>The Patient-Practitioner Interaction</b>                                  |                                        |                  |
| 24. The Process of Informed Consent.                                         | 88%                                    | 77%              |
| 25. Detailed History.                                                        | 19%                                    | 33%              |
| 26. Diagnosis/tests.                                                         | 36%                                    | 41%              |
| 27. Care.                                                                    | 0%                                     | 1%               |
| 28. Patient-Centred Communication.                                           | 0%                                     | 0%               |
| 29. Extra Attention.                                                         | 2%                                     | 63%              |
| 30. Continuity of Care.                                                      | 7%                                     | 14%              |

207

1  
2  
3 208 **The Patient's Characteristics and Beliefs**  
4

5  
6 209 The taxonomy specifies five procedures that act directly on the patient's characteristics and/or  
7  
8 210 beliefs in ways that might contribute to placebo effects. Procedure 1 involves selecting patients who  
9  
10 211 are most likely to benefit from an intervention based on their history of similar treatments (where  
11  
12 212 similarity is construed broadly at multiple levels, including appearance, modality, style, and  
13  
14 213 pharmacology). For example, one might select those patients who have not experienced  
15  
16 214 disappointing results from a similar intervention in the past (as the latter group might have learned  
17  
18 215 to expect the intervention to fail). This procedure was commonly used by clinical trials and (to a  
19  
20 216 lesser degree) experimental studies.  
21

22  
23  
24 217

25  
26  
27 218 Procedures 2 (create positive expectancy), 3 (reduce negative expectancy), and 4 (convey a positive  
28  
29 219 therapeutic message), all involve communicating with patients to encourage them to expect  
30  
31 220 beneficial effects of treatment or not to expect side-effects. The majority of experimental studies in  
32  
33 221 our review explicitly encouraged patients to expect treatment benefits, while very few clinical  
34  
35 222 studies explicitly targeted patients' expectations and hardly any studies at all attempted to minimise  
36  
37 223 patients' expectations of side-effects. Procedure 5 involves tailoring the intervention to the  
38  
39 224 patient's socio-cultural context. This approach emerged from the expert feedback and while it  
40  
41 225 seems plausible and ethical to translate into clinical practice, it was not used by any of the reviewed  
42  
43 226 studies.  
44  
45

46  
47 227

48  
49  
50 228 The procedures in the patients' beliefs and characteristics domain are thought to contribute to  
51  
52 229 placebo effects primarily through altering patients' response expectancy. Selecting patients based  
53  
54 230 on treatment history and tailoring to socio-cultural context are also predicated on learning  
55  
56 231 mechanisms, i.e., learned associations between treatment outcome and treatment properties.  
57  
58  
59  
60

1  
2  
3 232 There is some evidence that clinicians can give verbal suggestions to alter patients' expectations in  
4  
5 233 practice and in doing so to reduce patients' pain, particularly acute procedural pain<sup>44</sup>. As part of  
6  
7 234 work to implement these procedures more widely in practice it would be important to investigate  
8  
9 235 how to secure ethically valid consent for treatment. For example, clinicians might want to  
10  
11 236 encourage realistically positive patient expectations while providing information about possible  
12  
13 237 harms without inducing the negative expectations that could trigger nocebo effects<sup>45 46</sup>.

14  
15  
16  
17 238

### 18 19 239 **The Practitioner's Characteristics and Beliefs**

20  
21 240 The two procedures in this domain are about using or modifying health care practitioners'  
22  
23 241 characteristics and/or beliefs. Procedure 6 requires a practitioner to expect a treatment to benefit  
24  
25 242 the patient. This might contribute to observed placebo effects in patients by influencing a  
26  
27 243 practitioner's communication about the treatment and hence a patient's response expectations  
28  
29 244 and/or affective response to the consultation. Only 1% of clinical studies and no experimental  
30  
31 245 studies reported modifying practitioners' expectations. This procedure has received little attention  
32  
33 246 in the placebo literature but clinical research in musculoskeletal settings suggests practitioners'  
34  
35 247 outcome expectations can predict patients' pain outcomes<sup>47</sup>. One way to implement this procedure  
36  
37 248 in practice would be for practitioners to communicate explicitly that they believe a treatment is  
38  
39 249 effective, an approach which clearly overlaps with communication interventions designed to help  
40  
41 250 doctors encourage patients to have positive expectations. Implementing Procedure 6 also depends  
42  
43 251 on practitioners having relevant high quality evidence readily available and accessible and  
44  
45 252 understanding this evidence as it applies to the patient.

46  
47  
48  
49  
50 253

51  
52  
53 254 A small proportion of studies (9% of experimental studies and no clinical studies) emphasised a  
54  
55 255 practitioner's status or other characteristics (Procedure 7). For some patients a high status  
56  
57 256 practitioner might elicit more confidence in the treatment (and thus higher expectations) and/or a  
58  
59  
60

1  
2  
3 257 more positive affective response to the consultation<sup>48</sup>. Some aspects of this procedure are already  
4  
5 258 part of clinical practice, for example the routine display of medical certificates in doctors' offices;  
6  
7 259 others are inherent in the tools of the doctor, such as the symbolic properties of the stethoscope<sup>49</sup>.  
8  
9 260 However, there is likely to be scope for testing their effects and augmenting their use if appropriate.  
10  
11

12  
13 261

## 14 262 **The Healthcare Setting**

15  
16 263 Procedures 8 and 9 relate to the active efforts made in studies to recruit and retain patients  
17  
18 264 respectively. Clinical and experimental studies both reportedly used these procedures sparingly (<20%  
19  
20 265 for active recruitment and <5% for active retention). Such efforts may make patients feel valued and  
21  
22 266 could be implemented in practice through the use of personalised communications from  
23  
24 267 practitioners to encourage attendance at appointments.  
25  
26  
27

28 268

29  
30  
31 269 Three of the eight procedures in this domain were used by over half of clinical and experimental  
32  
33 270 studies and relate to basic structural features of research: following a protocol, ethical oversight, and  
34  
35 271 participating in research (procedures 11 to 13). They are thought to impact patients' expectations,  
36  
37 272 by emphasising the legitimacy of the intervention that is being provided and the importance of the  
38  
39 273 patient's contribution to a bigger project, i.e. generating knowledge. Translating these procedures  
40  
41 274 into practice could involve, for example, clinicians explicitly talking with patients about official  
42  
43 275 guidance and treatment protocols that they are following.  
44  
45  
46

47 276

48  
49  
50 277 Symptom monitoring (procedure 14) was commonly used in both clinical and experimental studies.  
51  
52 278 This could be implemented in practice for example through repeatedly using patient reported  
53  
54 279 outcome measures (see<sup>50</sup>) and might contribute to placebo effects through learning mechanisms  
55  
56 280 (e.g. regular symptom monitoring acts as feedback to motivate health behaviours and/or modify  
57  
58  
59  
60

1  
2  
3 281 patients' goals). Alternatively, the mere act of asking a patient to monitor their symptoms could  
4  
5 282 convey an expectation of treatment benefit, altering the meaning of a clinical interaction for the  
6  
7 283 patient. Traditionally such effects of the act of measurement are dismissed as Hawthorne effects  
8  
9 284 but they may also be encompassed in broader definitions of placebo effects as meaning effects<sup>51</sup>  
10  
11 285 and could thus enhance effects in clinical practice despite being considered a nuisance in clinical  
12  
13 286 research.

14  
15  
16  
17 287

18  
19  
20 288 Very few placebo studies (5% of experimental and no clinical studies) reported enhancing the  
21  
22 289 physical or interpersonal environment (procedure 15). There is a separate and distinct literature on  
23  
24 290 environment modifications in health settings that might be usefully integrated with the placebo  
25  
26 291 literature when developing clinical applications in this area and modelling mechanisms of action<sup>52,53</sup>.

27  
28  
29 292

### 30 293 **Treatment Characteristics**

31  
32  
33 294 Eight procedures in the taxonomy involve modifying the characteristics of a treatment. Three  
34  
35 295 involve prescribing sham interventions (sham medication – procedure 16, sham physical  
36  
37 296 interventions – procedure 17, and extra attention – procedure 18) while a fourth involves  
38  
39 297 prescribing a substance unlikely to be effective for the symptom in question (procedure 19). These  
40  
41 298 four procedures represent variations in control conditions used in research and were frequently  
42  
43 299 used by both clinical and experimental studies (with the exception of extra attention which was only  
44  
45 300 used by 2-5% of studies). Such controls are thought to operate primarily via expectations, while  
46  
47 301 affective pathways may also be important when extra attention from trial personnel/medical staff is  
48  
49 302 involved. Of all the procedures in the taxonomy these four that represent control conditions come  
50  
51 303 closest to the traditional notion of how placebos could be applied in practice. Given ethical concerns  
52  
53 304 around deceptive prescribing we suggest that translational research might continue to focus on  
54  
55 305 openly prescribing sham interventions including placebo pills (as in<sup>14,15</sup>). Other options should not  
56  
57  
58  
59  
60

1  
2  
3 306 be dismissed entirely though: advanced consent and even waiving consent are acceptable to some  
4  
5 307 patients and so it is vital for translational research to continue exploring patients', practitioners', and  
6  
7 308 other stakeholders' views on the acceptability and ethics of diverse ways of prescribing placebos<sup>54-57</sup>.  
8  
9

10 309

11  
12  
13 310 Three procedures in this domain modify the superficial (non-pharmacological or non-defining)  
14  
15 311 characteristics of treatments. Procedure 20 is to highlight treatment side-effects to patients in order  
16  
17 312 to encourage patients to see the treatment as potent; this procedure was very rare, used by only 1%  
18  
19 313 of clinical studies. Procedure 21 was much more commonly used and involves matching the  
20  
21 314 appearance of real and control treatments (used by 40% of experimental and 82% of clinical studies),  
22  
23 315 in order to maintain patient blinding. This could be translated into clinical practice by designing the  
24  
25 316 appearance of interventions to match patients' beliefs about what effective interventions look like.  
26  
27  
28 317 Procedure 22 involves maximising or exaggerating the superficial characteristics of treatment in  
29  
30 318 order to generate larger placebo effects for example by using colour, large pill size, or ritualistic  
31  
32 319 administration of medicines, manipulations which could alter the meaning of a treatment for a  
33  
34 320 patient and/or enhance their expectations. 22% of experimental studies reported using this  
35  
36 321 procedure and one way to translate it into practice would be to create (and test) ritualistic  
37  
38 322 procedures for patients to engage in when taking medicines.  
39  
40  
41

42 323

43  
44  
45 324 The final procedure in this domain – procedure 23, conditioning to generate placebo effects - was  
46  
47 325 used commonly and exclusively by experimental studies (41%). Conditioning protocols generate  
48  
49 326 placebo effects through learning mechanisms and perhaps could be implemented in practice to  
50  
51 327 reduce pharmaceutical dosages, as was achieved in a pilot study in children with attention deficit  
52  
53 328 disorder<sup>43</sup>.  
54  
55

56 329  
57  
58  
59  
60

### 330 **The Patient-Practitioner Interaction**

331 The *Patient-Practitioner Interaction* domain incorporates seven procedures related to the  
332 interpersonal relationship or interactions between a patient and their health care practitioner.  
333 These procedures are thought to operate primarily through affective mechanisms such as reduced  
334 anxiety after telling one's story and being listened to with empathy and acknowledged, although  
335 more cognitive pathways via expectations are also plausible<sup>58</sup>. Three procedures are about specific  
336 processes that can occur during consultations – obtaining informed consent (procedure 24), taking a  
337 detailed history (procedure 25), and performing additional diagnoses or tests (procedure 26).  
338 Arguably these procedures indicate to the patient that the practitioner respects them, is interested  
339 in their perspective, and is thorough in their diagnosis. They occur in both clinical and experimental  
340 research settings and could be relatively directly translated into practice or optimised if already used.

341

342 Two procedures are about the way in which the practitioner engages with the patient:  
343 communicating care (procedure 27), and patient-centred communication (procedure 28). These  
344 procedures were surprisingly very rarely described in the studies included in our review, although  
345 recently the nocebo effects of *not* validating a patient's experiences have been shown to be  
346 particularly potent<sup>59</sup>. There is of course a distinct and large literature on doctor-patient  
347 communication and fruitful dialogue is beginning to bridge these fields<sup>60</sup>.

348

349 The final two procedures in this domain refer to more structural aspects of consultations: extra  
350 attention (procedure 29, i.e. longer or more frequent appointments) and continuity of care  
351 (procedure 30). 63% of clinical studies used extra attention while a small proportion of clinical (14%)  
352 and experimental (7%) studies reported providing continuity of care. Directly implementing these  
353 procedures in practice might be challenging given ever increasing constraints on healthcare  
354 resources and drives to reduce cost.

1  
2  
3 355  
4  
5

6 356

## Discussion

7  
8 357 The taxonomy names and describes 30 procedures that may contribute to placebo effects in  
9  
10 358 experimental and clinical studies and classifies them into five domains. It includes 60 theoretically  
11  
12 359 plausible clinical applications, subject to further research on their effectiveness and ethical  
13  
14 360 acceptability in practice. Some of the clinical applications derived from the placebo literature have  
15  
16 361 already been investigated in their own right under other auspices, highlighting the need for the  
17  
18 362 burgeoning translational science of placebo effects to be broad-ranging and interdisciplinary.

19  
20  
21  
22 363

23  
24  
25 364 We have used rigorous systematic review and qualitative analytic methods complemented by a  
26  
27 365 survey to develop the taxonomy. Investigators often combine multiple techniques in any one  
28  
29 366 'placebo' (e.g. Create Positive Expectancy + Detailed History + Symptom Monitoring) making it  
30  
31 367 beyond the scope of this project to unpack the effectiveness of individual techniques. Procedures  
32  
33 368 did not always fit neatly into single domains. For example, "Screen for Treatment History" was used  
34  
35 369 to select patients for studies of specific treatments (and was thus placed in the Patient's Beliefs and  
36  
37 370 Characteristics domain), but its clinical application involves selecting a treatment for a specific  
38  
39 371 patient and so could be considered a Treatment Characteristic. Conceptually we would expect  
40  
41 372 interactions between these domains; for example, some procedures categorised in other domains  
42  
43 373 probably operate through causal pathways involving patients' beliefs as proximal determinants of  
44  
45 374 placebo effects<sup>61</sup>. We feel the benefits of having a hierarchical structure (modifiable as the  
46  
47 375 taxonomy is refined with use) outweigh the difficulties inherent in classification. We could have  
48  
49 376 used many published reviews of placebo studies in non-malignant pain to identify original studies to  
50  
51 377 review. Selecting seven such reviews means not using others, thus we might have missed original  
52  
53 378 studies that would have suggested additional procedures. Surveying leading researchers and  
54  
55 379 incorporating their suggestions somewhat mitigates this limitation. Our sample of researchers was



1  
2  
3 380 intended to be purposive, in that we wanted to obtain the views of leading researchers in the field.  
4  
5 381 By using multiple means of identifying such individuals internationally we feel we have achieved this.  
6  
7 382 The reviews that we selected as the source of our papers and the papers themselves are now  
8  
9 383 somewhat old examples of the literature; and our choice to exclude papers published before 1983  
10  
11 384 was arguably somewhat arbitrary. Future work should review very recent papers and iteratively  
12  
13 385 improve the taxonomy accordingly.  
14  
15  
16  
17 386

18  
19  
20 387 This review extends previous work by Di Blasi et al.<sup>31</sup>, building on their five domains to  
21  
22 388 systematically develop a detailed taxonomy. We provide a new overarching framework that avoids  
23  
24 389 the controversial and limited distinction between pure and impure placebos<sup>62 63</sup> and integrates ideas  
25  
26 390 from the rich clinical and experimental literatures on placebo effects in non-malignant pain. Many  
27  
28 391 of the components we have identified are likely to be important in other placebo-responsive  
29  
30 392 conditions including depression<sup>64</sup>, irritable bowel syndrome<sup>65 66</sup>, and insomnia<sup>67</sup>. This taxonomy  
31  
32 393 can guide two important and related applied research agendas: 1) to understand the components of  
33  
34 394 placebo effects in clinical settings<sup>48 68-71</sup> and 2) to ethically harness evidence-based placebo effects  
35  
36 395 to benefit patients<sup>14 15 72</sup>. We hope future studies might draw on the taxonomy to fully describe  
37  
38 396 their methods and develop new applications, thus facilitating future systematic reviews and the  
39  
40 397 development of a systematic and theory driven cumulative evidence-base in this complex field.  
41  
42  
43  
44 398

45  
46  
47 399 The taxonomy identifies and classifies procedures that may contribute to placebo effects in clinical  
48  
49 400 trials and experiments, providing an overarching framework for individual components. However,  
50  
51 401 we do not suggest that every technique in this taxonomy will produce a placebo effect in every  
52  
53 402 patient and we do not know from this project which techniques are more effective or how they  
54  
55 403 might be combined to form ethically acceptable and effective complex interventions. This taxonomy  
56  
57  
58  
59  
60

1  
2  
3 404 provides the first attempt at a necessary conceptual tool to facilitate future research on these  
4  
5 405 questions. For example, systematic reviews could use the taxonomy to code procedures in original  
6  
7 406 studies, using this information in meta-regression analysis to examine the contribution of different  
8  
9 407 procedures to placebo effects<sup>73</sup>. New clinical trials and experiments could extend existing work by  
10  
11 408 systematically examining and comparing the effects and ethical acceptability of different procedures  
12  
13 409 in the taxonomy, building a cumulative evidence-base that has real pragmatic applicability to clinical  
14  
15 410 practice. Some of the suggested clinical applications have been investigated more extensively in  
16  
17 411 other literatures, in particular doctor-patient communication and the healthcare environment. This  
18  
19 412 emphasises the need for a multi-disciplinary approach to the translation of placebo research into  
20  
21 413 practice. One fruitful way forward would be to draw on placebo theories to develop and test more  
22  
23 414 mechanistic models of complex interventions intended to alter the context of healthcare encounters.  
24  
25  
26  
27  
28  
29

415

30 416 Placebo recipients in clinical trials and experiments are exposed to a large number and variety of  
31  
32 417 procedures, many of which might contribute to placebo effects. Researchers seeking to develop a  
33  
34 418 translational science of placebo effects are thus faced with myriad possibilities. We have  
35  
36 419 systematically identified and defined these procedures, classified them into five domains, and  
37  
38 420 suggested possible clinical applications. The resulting taxonomy is presented as a preliminary but  
39  
40 421 detailed and systematic guide for future research, which should in turn further refine the taxonomy.  
41  
42 422 Ultimately we hope to better conceptualise investigations of clinical applications of placebo effects  
43  
44 423 in order to maximise opportunities for patient benefit.  
45  
46  
47  
48  
49  
50  
51  
52  
53  
54  
55  
56  
57  
58  
59  
60

## Funding

424  
425 The project “Creating a Taxonomy to Harness the Placebo effect in UK primary care” was funded by  
426 the National Institute of Health Research (NIHR) School for Primary Care Research (SPCR) (project  
427 number 161). This paper presents independent research funded by the National Institute of Health  
428 Research (NIHR). The views expressed are those of the author(s) and not necessarily those of the  
429 NHS, the NIHR or the Department of Health. Additional funding for BC was provided by Solent NHS  
430 Trust. The funders had no role in design and conduct of the study; collection, management, analysis,  
431 and interpretation of the data; preparation, review, or approval of the manuscript; and decision to  
432 submit the manuscript for publication.

## Acknowledgements

435 We would like to acknowledge the contribution of all of the researchers who shared their views in  
436 the survey, including Przemyslaw Babel PhD, Luana Colloca MD PhD, Professor Michael Doherty,  
437 Vanda Faria PhD, Professor Magne Arve Flaten PhD, Sarah Goldingay PhD, John Hughes PhD,  
438 Professor Dr Robert Juette, Irving Kirsch PhD, Karin Meissner PD Dr. med. Habil., Daniel E Moerman  
439 PhD, Meike Shedden Mora PhD, Donald D. Price PhD, Professor Dr Dr Harald Walach. We thank  
440 Professor Ted Kaptchuk for comments on an earlier draft of this manuscript.

## Competing Interests

443 All authors have completed the ICMJE uniform disclosure form at  
444 [http://www.icmje.org/coi\\_disclosure.pdf](http://www.icmje.org/coi_disclosure.pdf) and declare: no support from any organisation for the  
445 submitted work; no financial relationships with any organisations that might have an interest in the

1  
2  
3 446 submitted work in the previous three years, no other relationships or activities that could appear to  
4  
5 447 have influenced the submitted work.  
6  
7

### 8 **Exclusive Licence**

9 449 The Corresponding Author has the right to grant on behalf of all authors and does grant on behalf of  
10  
11 450 all authors, a worldwide licence  
12  
13 451 (<http://www.bmj.com/sites/default/files/BMJ%20Author%20Licence%20March%202013.doc>) to the  
14  
15 452 Publishers and its licensees in perpetuity, in all forms, formats and media (whether known now or  
16  
17 453 created in the future), to i) publish, reproduce, distribute, display and store the Contribution, ii)  
18  
19 454 translate the Contribution into other languages, create adaptations, reprints, include within  
20  
21 455 collections and create summaries, extracts and/or, abstracts of the Contribution and convert or  
22  
23 456 allow conversion into any format including without limitation audio, iii) create any other derivative  
24  
25 457 work(s) based in whole or part on the on the Contribution, iv) to exploit all subsidiary rights to  
26  
27 458 exploit all subsidiary rights that currently exist or as may exist in the future in the Contribution, v)  
28  
29 459 the inclusion of electronic links from the Contribution to third party material where-ever it may be  
30  
31 460 located; and, vi) licence any third party to do any or all of the above.  
32  
33  
34  
35

### 36 **Contributorship Statement**

37 461 FB designed and led the study, drafted the manuscript, and is guarantor. FB, GL, AWAG, HE, and PL  
38  
39 462 secured funding for the project. FB designed the study with input and revisions from GL, BC, AWAG,  
40  
41 463 HE, and PL. BC led data collection and analysis with additional data collection and analysis by MH  
42  
43 464 and DS. All authors contributed to data interpretation. FB drafted the manuscript and all authors  
44  
45 465 revised it for important intellectual content. All authors had full access to all of the data in the study  
46  
47 466 and can take responsibility for the integrity of the data and the accuracy of the data analysis.  
48  
49  
50

### 51 **Data Sharing Statement**

52 468 No unpublished data available.  
53  
54  
55  
56 470  
57  
58  
59  
60

## References

1. Zhang W, Robertson J, Jones AC, et al. The placebo effect and its determinants in osteoarthritis: meta-analysis of randomised controlled trials. *Ann Rheum Dis* 2008;**67**(12):1716-23.
2. Hrobjartsson A, Gotzsche PC. Placebo interventions for all clinical conditions. *Cochrane Database of Systematic Reviews* 2010;**1**:Art. No.: CD003974-DOI: 10.1002/14651858.CD003974.pub3.
3. Vase L, Riley JL, Price DD. A comparison of placebo effects in clinical analgesic trials versus studies of placebo analgesia. *Pain* 2002;**99**(3):443-52.
4. Peerdeman KJ, van Laarhoven AIM, Keij SM, et al. Relieving patients' pain with expectation interventions: a meta-analysis. *Pain* 2016;**157**(6):1179-91.
5. Brody H. The placebo response. *J Fam Pract* 2000;**49**:649-54.
6. Moerman DE, Jonas WB. Deconstructing the placebo effect and finding the meaning response. *Ann Intern Med* 2002;**136**(6):471-76.
7. Colloca L, Miller FG. How placebo responses are formed: a learning perspective. *Philosophical Transactions of the Royal Society B: Biological Sciences* 2011;**366**(1572):1859-69.
8. Howick J, Friedemann C, Tsakok M, et al. Are Treatments More Effective than Placebos? A Systematic Review and Meta-Analysis. *PLoS One* 2013;**8**(5):e62599.
9. Doherty M, Dieppe P. The "placebo" response in osteoarthritis and its implications for clinical practice. *Osteoarthritis Cartilage* 2009;**17**(10):1255-62.
10. Lichtenberg P, Heresco-Levy U, Nitzan U. The ethics of the placebo in clinical practice. *J Med Ethics* 2004;**30**:551-54.
11. Colloca L, Miller FG. Harnessing the placebo effect: the need for translational research. *Philosophical Transactions of the Royal Society B: Biological Sciences* 2011;**366**(1572):1922-30.
12. Benedetti F, Pollo A, Lopiano L, et al. Conscious expectation and unconscious conditioning in analgesic, motor, and hormonal placebo/nocebo responses. *The Journal of Neuroscience* 2003;**23**(10):4315-23.
13. Bingel U, Wanigasekera V, Wiech K, et al. The Effect of Treatment Expectation on Drug Efficacy: Imaging the Analgesic Benefit of the Opioid Remifentanyl. *Science Translational Medicine* 2011;**3**(70):70ra14-70ra14.
14. Kaptchuk TJ, Friedlander E, Kelley JM, et al. Placebos without deception: A randomized controlled trial in Irritable Bowel Syndrome. *PLoS One* 2010;**5**(12):e15591.
15. Kelley JM, Kaptchuk TJ, Cusin C, et al. Open-label placebo for major depressive disorder: a pilot randomized-controlled trial. *Psychother Psychosom* 2012;**81**:312-14.
16. Blease C, Colloca L, Kaptchuk TJ. Are open-Label Placebos Ethical? Informed Consent and Ethical Equivocations. *Bioethics* 2016;**30**(6):407-14.
17. Barnhill A, Miller FG. The ethics of placebo treatments in clinical practice: a reply to Glackin. *J Med Ethics* 2015.
18. Enck P, Bingel U, Schedlowski M, et al. The placebo response in medicine: minimize, maximize or personalize? *Nat Rev Drug Discov* 2013;**12**(3):191-204.
19. Linde K, F,ssler M, Meissner K. Placebo interventions, placebo effects and clinical practice. *Philosophical Transactions of the Royal Society B: Biological Sciences* 2011;**366**(1572):1905-12.
20. Klinger R, Colloca L, Bingel U, et al. Placebo analgesia: Clinical applications. *Pain* 2014;**155**(6):1055-58.
21. Kaptchuk TJ, Miller FG. Placebo Effects in Medicine. *N Engl J Med* 2015;**373**(1):8-9.
22. Dowell D, Haegerich TM, Chou R. CDC guideline for prescribing opioids for chronic pain—united states, 2016. *JAMA* 2016;**315**(15):1624-45.
23. Colloca L, Klinger R, Flor H, et al. Placebo analgesia: psychological and neurobiological mechanisms. *Pain* 2013;**154**(4):511-4.
24. Price DD, Finniss DG, Benedetti F. A comprehensive review of the placebo effect: Recent advances and current thought. *Annu Rev Psychol* 2008;**59**:565-90.

- 1  
2  
3 522 25. Finniss DG, Kaptchuk TJ, Miller FG, et al. Biological, clinical, and ethical advances of placebo  
4 523 effects. *Lancet* 2010;**375**(9715):686-95.
- 5 524 26. Manchikanti L, Giordano J, Fellows B, et al. Placebo and nocebo in interventional pain  
6 525 management: A friend or a foe - or simply foes? *Pain Physician* 2011;**14**:E157-E75.
- 7 526 27. Puhl AA, Reinhart CJ, Rok ER, et al. An examination of the observed placebo effect associated  
8 527 with the treatment of low back pain - a systematic review. *Pain Research & Management*  
9 528 2011;**16**(1):45-52.
- 10 529 28. Faria V, Fredrikson M, Furmark T. Imaging the placebo response: A neurofunctional review. *Eur*  
11 530 *Neuropsychopharmacol* 2008;**18**(7):473-85.
- 12 531 29. Vase L, Petersen GL, Riley Iii JL, et al. Factors contributing to large analgesic effects in placebo  
13 532 mechanism studies conducted between 2002 and 2007. *Pain* 2009;**145**(1-2):36-44.
- 14 533 30. Kirsch I. Placebo psychotherapy: Synonym or oxymoron? *J Clin Psychol* 2005;**61**(7):791-803.
- 15 534 31. Di Blasi Z, Harkness E, Ernst E, et al. Influence of context effects on health outcomes: a  
16 535 systematic review. *Lancet* 2001;**357**:757-62.
- 17 536 32. Strauss A, Corbin J. *Basics of Qualitative Research Techniques and Procedures for Developing*  
18 537 *Grounded Theory*. Thousand Oaks: Sage, 1998.
- 19 538 33. Meissner K, Kohls N, Colloca L. Introduction to placebo effects in medicine: mechanisms and  
20 539 clinical implications. *Philosophical Transactions of the Royal Society B: Biological Sciences*  
21 540 2011;**366**(1572):1783-89.
- 22 541 34. Price DD, Chung SK, Robinson ME. Conditioning, expectation, and desire for relief in placebo  
23 542 analgesia. *Seminars in Pain Medicine* 2005;**3**(1):15-21.
- 24 543 35. Benedetti F, Amanzio M. The placebo response: How words and rituals change the patient's  
25 544 brain. *Patient Educ Couns* 2011;**84**(3):413-19.
- 26 545 36. Goffaux P, Leonard G, Marchand S, et al. Placebo analgesia. In: Beaulieu P, Lussier D, Porreca F, et  
27 546 al., eds. *Pharmacology of Pain*. Seattle, WA: IASP Press, 2010:451-73.
- 28 547 37. Kirsch I. Response expectancy theory and application: A decennial review. *Appl Prev Psychol*  
29 548 1997;**6**(2):69-79.
- 30 549 38. Hyland ME, Whalley B. Motivational concordance: An important mechanism in self-help  
31 550 therapeutic rituals involving inert (placebo) substances. *J Psychosom Res* 2008;**65**(5):405-13.
- 32 551 39. Stewart-Williams S, Podd J. The placebo-effect: Dissolving the expectancy versus conditioning  
33 552 debate. *Psychol Bull* 2004;**130** (2):324-40.
- 34 553 40. Benedetti F. Placebo and the New Physiology of the Doctor-Patient Relationship. *Physiol Rev*  
35 554 2013;**93**(3):1207-46.
- 36 555 41. Jubb J, Bensing JM. The sweetest pill to swallow: How patient neurobiology can be harnessed to  
37 556 maximise placebo effects. *Neurosci Biobehav Rev* 2013;**37**(10, Part 2):2709-20.
- 38 557 42. Benedetti F, Maggi G, Lopiano L, et al. Open versus hidden medical treatments: The patient's  
39 558 knowledge about a therapy affects the therapy outcome. *Prevention & Treatment*  
40 559 2003;**6**(1):No.
- 41 560 43. Sandler AD, Bodfish JW. Open-label use of placebos in the treatment of ADHD: a pilot study.  
42 561 *Child Care Health Dev* 2008;**34**(1):104-10.
- 43 562 44. Mistiaen P, van Osch M, van Vliet L, et al. The effect of patient-practitioner communication on  
44 563 pain: a systematic review. *Eur J Pain* 2015.
- 45 564 45. Planès S, Villier C, Mallaret M. The nocebo effect of drugs. *Pharmacology Research &*  
46 565 *Perspectives* 2016;**4**(2):n/a-n/a.
- 47 566 46. Colloca L, Finniss D. Nocebo effects, patient-clinician communication, and therapeutic outcomes.  
48 567 *JAMA* 2012;**307**(6):567-8.
- 49 568 47. Witt CM, Martins F, Willich SN, et al. Can I help you? Physicians' expectations as predictor for  
50 569 treatment outcome. *European Journal of Pain* 2012;**16**(10):1455-66.
- 51 570 48. White P, Bishop FL, Prescott P, et al. Practice, practitioner or placebo? A multifactorial, mixed  
52 571 methods randomized controlled trial of acupuncture. *Pain* 2012;**153**:455-62.

- 1  
2  
3 572 49. Rice T. 'The hallmark of a doctor': the stethoscope and the making of medical identity. *Journal of*  
4 573 *Material Culture* 2010;**15**(3):287-301.
- 5 574 50. Snyder CF, Aaronson NK, Choucair AK, et al. Implementing patient-reported outcomes  
6 575 assessment in clinical practice: a review of the options and considerations. *Qual Life Res*  
7 576 2012;**21**(8):1305-14.
- 8 577 51. Benedetti F, Carlino E, Piedimonte A. Increasing uncertainty in CNS clinical trials: the role of  
9 578 placebo, nocebo, and Hawthorne effects. *The Lancet Neurology*; **15**(7):736-47.
- 10 579 52. Drahota A, Ward D, Mackenzie H, et al. Sensory environment on health-related outcomes of  
11 580 hospital patients (Review). *Cochrane Database of Systematic Reviews* 2012;**3**:Art. No.:  
12 581 CD005315. DOI: 10.1002/14651858.CD005315.pub2.
- 13 582 53. Dijkstra K, Pieterse M, Pruyn A. Physical environmental stimuli that turn healthcare facilities into  
14 583 healing environments through psychologically mediated effects: systematic review. *J Adv*  
15 584 *Nurs* 2006;**56**(2):166-81.
- 16 585 54. Feffer K, Lichtenberg P, Becker G, et al. A comparative study with depressed patients on the  
17 586 acceptability of placebo use. *Gen Hosp Psychiatry* 2016;**41**:53-6.
- 18 587 55. Ortiz R, Chandros Hull S, Colloca L. Patient attitudes about the clinical use of placebo: qualitative  
19 588 perspectives from a telephone survey. *BMJ Open* 2016;**6**(4).
- 20 589 56. Bishop FL, Howick J, Heneghan C, et al. Placebo use in the United Kingdom: a qualitative study  
21 590 exploring GPs' views on placebo effects in clinical practice. *Fam Pract* 2014;**Advance**  
22 591 **Access**:1-7. doi:10.1093/fampra/cmu016.
- 23 592 57. Bishop FL, Aizlewood L, Adams AEM. When and Why Placebo-Prescribing Is Acceptable and  
24 593 Unacceptable: A Focus Group Study of Patients' Views. *PLoS One* 2014;**9**(7):e101822.
- 25 594 58. Street, Jr., Makoul G, Arora NK, et al. How does communication heal? Pathways linking clinician-  
26 595 patient communication to health outcomes. *Patient Educ Couns* 2009;**74**(3):295-301.
- 27 596 59. Greville-Harris M, Dieppe P. Bad Is More Powerful than Good: The Nocebo Response in Medical  
28 597 Consultations. *The American Journal of Medicine* 2015;**128**(2):126-29.
- 29 598 60. Bensing JM, Verheul W. The silent healer: The role of communication in placebo effects. *Patient*  
30 599 *Educ Couns* 2010;**80**(3):293-99.
- 31 600 61. Kirsch I. Conditioning, expectancy, and the placebo effect: Comment on Stewart-Williams and  
32 601 Podd (2004). *Psychol Bull* 2004;**130**(2):341-43.
- 33 602 62. Fassler M, Gnadinger M, Rosemann T, et al. Use of placebo interventions among Swiss primary  
34 603 care providers. *BMC Health Serv Res* 2009;**9**(1):144.
- 35 604 63. Howick J, Bishop FL, Heneghan C, et al. Placebo use in the United Kingdom: results from a  
36 605 national survey of primary care practitioners. *PLoS One* 2013;**8**(3):e58247.  
37 606 doi:10.1371/journal.pone.0058247.
- 38 607 64. Kirsch I, Sapirstein G. Listening to prozac but hearing placebo: A meta-analysis of antidepressant  
39 608 medication. *Prevention & Treatment* 1998;**1** Article 0002a, posted June 26, 1998.
- 40 609 65. Patel SM, Stason WB, Legedza A, et al. The placebo effect in irritable bowel syndrome trials: a  
41 610 meta-analysis. *Neurogastroenterol Motil* 2005;**17**(3):332-40.
- 42 611 66. Ford AC, Moayyedi P. Meta-analysis: factors affecting placebo response rate in the irritable  
43 612 bowel syndrome. *Aliment Pharmacol Ther* 2010;**32**(2):144-58.
- 44 613 67. Bélanger L, Vallières A, Ivers H, et al. Meta-analysis of sleep changes in control groups of  
45 614 insomnia treatment trials. *J Sleep Res* 2007;**16**(1):77-84.
- 46 615 68. Kaptchuk TJ, Kelley JM, Conboy LA, et al. Components of placebo effect: randomised controlled  
47 616 trial in patients with irritable bowel syndrome. *Br Med J* 2008;**336**:999-1003.
- 48 617 69. Suarez-Almazor ME, Looney C, Liu Y, et al. A randomized controlled trial of acupuncture for  
49 618 osteoarthritis of the knee: Effects of patient-provider communication. *Arthritis Care Res*  
50 619 2010;**62**(9):1229-36.
- 51 620 70. Kaptchuk TJ, Stason WB, Davis RB, et al. Sham device v inert pill: randomised controlled trial of  
52 621 two placebo treatments. *Br Med J* 2006;**332**(7538):391-94.

- 1  
2  
3 622 71. Vase L, Baram S, Takakura N, et al. Specifying the nonspecific components of acupuncture  
4 623 analgesia. *Pain* 2013;**154**(9):1659-67.  
5 624 72. Sandler A, Glesne C, Geller G. Children's and parents' perspectives on open-label use of placebos  
6 625 in the treatment of ADHD. *Child Care Health Dev* 2008;**34**(1):111-20.  
7 626 73. Michie S, Abraham C, Whittington C, et al. Effective techniques in healthy eating and physical  
8 627 activity interventions: a meta-regression. *Health Psychol* 2009;**28**(6):690-701.

9  
10 628  
11  
12  
13  
14  
15  
16  
17  
18  
19  
20  
21  
22  
23  
24  
25  
26  
27  
28  
29  
30  
31  
32  
33  
34  
35  
36  
37  
38  
39  
40  
41  
42  
43  
44  
45  
46  
47  
48  
49  
50  
51  
52  
53  
54  
55  
56  
57  
58  
59  
60

For peer review only



1  
2  
3  
4  
5  
6  
7  
8  
9  
10  
11  
12  
13  
14  
15  
16  
17  
18  
19  
20  
21  
22  
23  
24  
25  
26  
27  
28  
29  
30  
31  
32  
33  
34  
35  
36  
37  
38  
39  
40  
41  
42  
43  
44  
45  
46  
47  
48  
49  
50  
51  
52  
53  
54  
55  
56  
57  
58  
59  
60

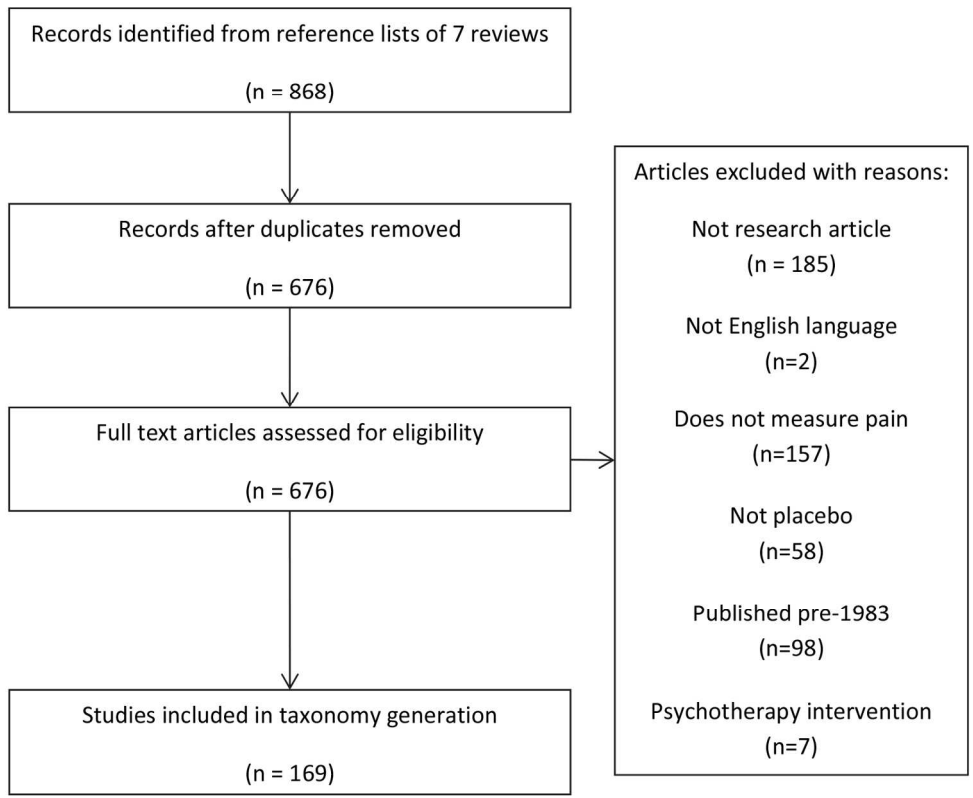

Flowchart Showing Identification of Studies

155x127mm (300 x 300 DPI)

## Supplementary Digital Content

### List of Included Studies

[1-169]

- [1] Alfano AP, Taylor AG, Foresman PA, Dunk PR, McConnell GG, Gillies GT. Static magnetic fields for treatment of fibromyalgia: A randomized controlled trial. *J Altern Complement Med* 2001;7(1):53.
- [2] Alford JW, Fadale PD. Evaluation of postoperative bupivacaine infusion for pain management after anterior cruciate ligament reconstruction. *Arthroscopy-the Journal of Arthroscopic and Related Surgery* 2003;19(8):855.
- [3] Amanzio M, Benedetti F. Neuropharmacological Dissection of Placebo Analgesia: Expectation-Activated Opioid Systems versus Conditioning-Activated Specific Subsystems. *The Journal of Neuroscience* 1999;19(1):484-494.
- [4] Amanzio M, Pollo A, Maggi G, Benedetti F. Response variability to analgesics: a role for non-specific activation of endogenous opioids. *Pain* 2001;90(3):205-215.
- [5] Amlie E, Weber H, Holme I. Treatment of Acute Low-back Pain with Piroxicam: Results of a Double-blind Placebo-controlled Trial. *Spine* 1987;12(5):473-476.
- [6] Andersen AN, Damm P, Tabor A, Pedersen IM, Harring M. Prevention of Breast Pain and Milk Secretion with Bromocriptine After Second-Trimester Abortion. *Acta Obstet Gynecol Scand* 1990;69(3):235-238.
- [7] Aslaksen PM, Flaten MA. The Roles of Physiological and Subjective Stress in the Effectiveness of a Placebo on Experimentally Induced Pain. *Psychosom Med* 2008;70(7):811-818.
- [8] Atkinson JH, Slater MA, Williams RA, Zisook S, Patterson TL, Grant I, Wahlgren DR, Abramson I, Garfin SR. A placebo-controlled randomized clinical trial of nortriptyline for chronic low back pain. *Pain* 1998;76(3):287-296.
- [9] Bannwarth B, Allaert FA, Avouac B, Rossignol M, Rozenberg S, Valat JP. A randomized, double-blind, placebo controlled triphosphate in study of oral adenosine subacute low back pain. *J Rheumatol* 2005;32(6):1114-1117.
- [10] Basford JR, Sheffield CG, Harmsen WS. Laser therapy: a randomized, controlled trial of the effects of low-intensity Nd:YAG laser irradiation on musculoskeletal back pain. *Arch Phys Med Rehabil* 1999;80(6):647-652.
- [11] Basmajian JV. Acute back pain and spasm. A controlled multicenter trial of combined analgesic and antispasm agents. *Spine (Phila Pa 1976)* 1989;14(4):438-439.
- [12] Benedetti F. The opposite effects of the opiate antagonist naloxone and the cholecystokinin antagonist proglumide on placebo analgesia. *Pain* 1996;64(3):535-543.
- [13] Benedetti F, Amanzio M, Baldi S, Casadio C, Cavallo A, Mancuso M, Ruffini E, Oliaro A, Maggi G. The specific effects of prior opioid exposure on placebo analgesia and placebo respiratory depression. *Pain* 1998;75(2-3):313-319.
- [14] Benedetti F, Amanzio M, Casadio C, Oliaro A, Maggi G. Blockade of nocebo hyperalgesia by the cholecystokinin antagonist proglumide. *Pain* 1997;71(2):135-140.
- [15] Benedetti F, Amanzio M, Maggi G. Potentiation of placebo analgesia by proglumide. *The Lancet* 1995;346(8984):1231.
- [16] Benedetti F, Amanzio M, Vighetti S, Asteggiano G. The Biochemical and Neuroendocrine Bases of the Hyperalgesic Nocebo Effect. *The Journal of Neuroscience* 2006;26(46):12014-12022.
- [17] Benedetti F, Arduino C, Amanzio M. Somatotopic activation of opioid systems by target-directed expectations of analgesia. *J Neurosci* 1999;19(9):3639-3648.
- [18] Benedetti F, Arduino C, Costa S, Vighetti S, Tarenzi L, Rainero I, Asteggiano G. Loss of expectation-related mechanisms in Alzheimer's disease makes analgesic therapies less effective. *Pain* 2006;121(1):133-144.

- 1  
2  
3 [19] Benedetti F, Pollo A, Lopiano L, Lanotte M, Vighetti S, Rainero I. Conscious expectation and  
4 unconscious conditioning in analgesic, motor, and hormonal placebo/nocebo responses. *The*  
5 *Journal of Neuroscience* 2003;23(10):4315-4323.  
6  
7 [20] Benedetti FMD, Amanzio MMS, Casadio CMD, Cavallo AMD, Cianci RMD, Giobbe RMD, Mancuso  
8 MMD, Ruffini EMD, Maggi GMD. Control of Postoperative Pain by Transcutaneous Electrical  
9 Nerve Stimulation After Thoracic Operations. *The Annals of Thoracic Surgery*  
10 1997;63(3):773-776.  
11  
12 [21] Berry H, Hutchinson DR. A multicentre placebo-controlled study in general practice to evaluate  
13 the efficacy and safety of tizanidine in acute low-back pain. *J Int Med Res* 1988;16(2):75-82.  
14  
15 [22] Bingel U, Lorenz J, Schoell E, Weiller C, Büchel C. Mechanisms of placebo analgesia: rACC  
16 recruitment of a subcortical antinociceptive network. *Pain* 2006;120(1):8-15.  
17  
18 [23] Birbara CA, Puopolo AD, Munoz DR, Sheldon EA, Mangione A, Bohidar NR, Geba GP. Treatment  
19 of chronic low back pain with etoricoxib, a new cyclo-oxygenase-2 selective inhibitor:  
20 improvement in pain and disability--a randomized, placebo-controlled, 3-month trial. *The*  
21 *Journal of Pain : official journal of the American Pain Society* 2003;4(6):307-315.  
22  
23 [24] Biro P, Meier T, Cummins AS. Comparison of topical anaesthesia methods for venous  
24 cannulation in adults. *Eur J Pain* 1997;1(1):37-42.  
25  
26 [25] Blanchard EB, Appelbaum KA, Radnitz CL, Michultka D, Morrill B, Kirsch C, Hillhouse J, Evans DD,  
27 Guarnieri P, Attanasio V, et al. Placebo-controlled evaluation of abbreviated progressive  
28 muscle relaxation and of relaxation combined with cognitive therapy in the treatment of  
29 tension headache. *J Consult Clin Psychol* 1990;58(2):210-215.  
30  
31 [26] Blanchard EB, Appelbaum KA, Radnitz CL, Morrill B, Michultka D, Kirsch C, Guarnieri P, Hillhouse  
32 J, Evans DD, Jaccard J, et al. A controlled evaluation of thermal biofeedback and thermal  
33 biofeedback combined with cognitive therapy in the treatment of vascular headache. *J*  
34 *Consult Clin Psychol* 1990;58(2):216-224.  
35  
36 [27] Boissel JP, Philippon AM, Gauthier E, Schbath J, Destors JM. Time course of long-term placebo  
37 therapy effects in angina pectoris. *Eur Heart J* 1986;7(12):1030-1036.  
38  
39 [28] Bova JG, Bhattacharjee N, Jurdi R, Bennett WF. Comparison of no medication, placebo, and  
40 hyoscyamine for reducing pain during a barium enema. *Am J Roentgenol* 1999;172(5):1285-  
41 1287.  
42  
43 [29] Brinkhaus B, Witt CM, Jena S, Linde K, Streng A, Wagenpfeil S, Irnich D, Walther HU, Melchart D,  
44 Willich SN. Acupuncture in patients with chronic low back pain - A randomized controlled  
45 trial. *Arch Intern Med* 2006;166(4):450-457.  
46  
47 [30] Camilleri M, Northcutt AR, Kong S, Dukes GE, McSorley D, Mangel AW. Efficacy and safety of  
48 alosetron in women with irritable bowel syndrome: a randomised, placebo-controlled trial.  
49 *The Lancet* 2000;355(9209):1035-1040.  
50  
51 [31] Carbajal R, Chauvet X, Couderc S, Olivier-Martin M. Randomised trial of analgesic effects of  
52 sucrose, glucose, and pacifiers in term neonates. *BMJ* 1999;319(7222):1393-1397.  
53  
54 [32] Carette S, Leclaire R, Marcoux S, Morin F, Blaise GA, St-Pierre A, Truchon R, Parent F, Levesque J,  
55 Bergeron V, Montminy P, Blanchette C. Epidural corticosteroid injections for sciatica due to  
56 herniated nucleus pulposus. *N Engl J Med* 1997;336(23):1634-1640.  
57  
58 [33] Charron J, Rainville P, Marchand S. Direct comparison of placebo effects on clinical and  
59 experimental pain. *Clin J Pain* 2006;22(2):204-211.  
60  
61 [34] Cherkin DC, Sherman KJ, Avins AL, et al. A randomized trial comparing acupuncture, simulated  
62 acupuncture, and usual care for chronic low back pain. *Arch Intern Med* 2009;169(9):858-  
63 866.  
64  
65 [35] Chrubasik S, Eisenberg E, Balan E, Weinberger T, Luzzati R, Conrath C. Treatment of low back  
66 pain exacerbations with willow bark extract: a randomized double-blind study. *Am J Med*  
67 2000;109(1):9-14.

- 1  
2  
3 [36] Chrubasik S, Junck H, Breitschwerdt H, Conradt C, Zappe H. Effectiveness of Harpagophytum  
4 extract WS 1531 in the treatment of exacerbation of low back pain: a randomized, placebo-  
5 controlled, double-blind study. *Eur J Anaesthesiol* 1999;16(2):118-129.
- 6 [37] Chung SK, Price DD, Verne GN, Robinson ME. Revelation of a personal placebo response: Its  
7 effects on mood, attitudes and future placebo responding. *Pain* 2007;132(3):281-288.
- 8 [38] Classen W, Feingold E, Netter P. Influence of sensory suggestibility on treatment outcome in  
9 headache patients. *Neuropsychobiology* 1983;10(1):44-47.
- 10 [39] Coats TL, Borenstein DG, Nangia NK, Brown MT. Effects of valdecoxib in the treatment of  
11 chronic low back pain: results of a randomized, placebo-controlled trial. *Clin Ther*  
12 2004;26(8):1249-1260.
- 13 [40] Colloca L, Benedetti F. How prior experience shapes placebo analgesia. *Pain* 2006;124(1-2):126-  
14 133.
- 15 [41] Colloca L, Benedetti F. Placebo analgesia induced by social observational learning. *Pain*  
16 2009;144(1-2):28-34.
- 17 [42] Colloca L, Petrovic P, Wager TD, Ingvar M, Benedetti F. How the number of learning trials affects  
18 placebo and nocebo responses. *Pain* 2010;151(2):430-439.
- 19 [43] Colloca L, Sigauco M, Benedetti F. The role of learning in nocebo and placebo effects. *Pain*  
20 2008;136(1-2):211-218.
- 21 [44] Conn IG, Marshall AH, Yadav SN, Daly JC, Jaffer M. Transcutaneous electrical nerve stimulation  
22 following appendectomy: the placebo effect. *Ann R Coll Surg Engl* 1986;68(4):191-192.
- 23 [45] Corson SL, Batzer FR, Gocial B, Kelly M, Gutmann JN, Go KJ, English ME. Is paracervical block  
24 anesthesia for oocyte retrieval effective? *Fertil Steril* 1994;62(1):133-136.
- 25 [46] Costello M, Ramundo M, Christopher NC, Powell KR. Ethyl Vinyl Chloride Vapocoolant Spray  
26 Fails to Decrease Pain Associated with Intravenous Cannulation in Children. *Clin Pediatr*  
27 (Phila) 2006;45(7):628-632.
- 28 [47] Coyne PJ, MacMurren M, Izzo T, Kramer T. Transcutaneous electrical nerve stimulator for  
29 procedural pain associated with intravenous needlesticks. *J Intraven Nurs* 1995;18(5):263-  
30 267.
- 31 [48] Dapas F, Hartman SF, Martinez L, Northrup BE, Nussdorf RT, Silberman HM, Gross H. Baclofen  
32 for the treatment of acute low-back syndrome. A double-blind comparison with placebo.  
33 *Spine (Phila Pa 1976)* 1985;10(4):345-349.
- 34 [49] De Pascalis V, Chiaradia C, Carotenuto E. The contribution of suggestibility and expectation to  
35 placebo analgesia phenomenon in an experimental setting. *Pain* 2002;96(3):393-402.
- 36 [50] deCharms RC, Maeda F, Glover GH, Ludlow D, Pauly JM, Soneji D, Gabrieli JDE, Mackey SC.  
37 Control over brain activation and pain learned by using real-time functional MRI. *Proc Natl*  
38 *Acad Sci U S A* 2005;102(51):18626-18631.
- 39 [51] Defrin R, Ariel E, Peretz C. Segmental noxious versus innocuous electrical stimulation for chronic  
40 pain relief and the effect of fading sensation during treatment. *Pain* 2005;115(1):152-160.
- 41 [52] Dickens C, Jayson M, Sutton C, Creed F. The relationship between pain and depression in a trial  
42 using paroxetine in sufferers of chronic low back pain. *Psychosomatics* 2000;41(6):490-499.
- 43 [53] Ditto B, France CR. The effects of applied tension on symptoms in French-speaking blood  
44 donors: a randomized trial. *Health Psychol* 2006;25(3):433-437.
- 45 [54] Ditto B, France CR, Lavoie P, Roussos M, Adler PS. Reducing reactions to blood donation with  
46 applied muscle tension: a randomized controlled trial. *Transfusion (Paris)* 2003;43(9):1269-  
47 1275.
- 48 [55] Dreiser RL, Marty M, Ionescu E, Gold M, Liu JH. Relief of acute low back pain with diclofenac-K  
49 12.5 mg tablets: a flexible dose, ibuprofen 200 mg and placebo-controlled clinical trial. *Int J*  
50 *Clin Pharmacol Ther* 2003;41(9):375-385.
- 51 [56] Erdogmus CB, Resch KL, Sabitzer R, Muller H, Nuhr M, Schoggl A, Posch M, Osterode W,  
52 Ungersbock K, Ebenbichler GR. Physiotherapy-based rehabilitation following disc herniation  
53  
54  
55  
56  
57  
58  
59  
60

- operation: results of a randomized clinical trial. *Spine (Phila Pa 1976)* 2007;32(19):2041-2049.
- [57] Faas A, Chavannes AW, van Eijk JT, Gubbels JW. A randomized, placebo-controlled trial of exercise therapy in patients with acute low back pain. *Spine (Phila Pa 1976)* 1993;18(11):1388-1395.
- [58] Fanti L, Gemma M, Passaretti S, Guslandi M, Testoni PA, Casati A, Torri G. Electroacupuncture Analgesia for Colonoscopy: A Prospective, Randomized, Placebo-Controlled Study. *Am J Gastroenterol* 2003;98(2):312-316.
- [59] Forster EL, Kramer JF, Lucy SD, Scudds RA, Novick RJ. Effect of tens on pain, medications, and pulmonary function following coronary artery bypass graft surgery. *CHEST Journal* 1994;106(5):1343-1348.
- [60] Foster KA, Liskin J, Cen S, Abbott A, Armisen V, Globe D, Knox L, Mitchell M, Shtir C, Azen S. The Trager approach in the treatment of chronic headache: a pilot study. *Altern Ther Health Med* 2004;10(5):40-46.
- [61] Foster NE, Thomas E, Barlas P, Hill JC, Young J, Mason E, Hay EM. Acupuncture as an adjunct to exercise based physiotherapy for osteoarthritis of the knee: randomised controlled trial. *BMJ* 2007;335(7617):436.
- [62] Frega A, Stentella P, Di Renzi F, Gallo G, Palazzetti PL, Del Vescovo M, Ciccarone M, Pachi A. Pain evaluation during carbon dioxide laser vaporization for cervical intraepithelial neoplasia: a randomized trial. *Clin Exp Obstet Gynecol* 1994;21(3):188-191.
- [63] Gale GD, Rothbart PJ, Li Y. Infrared therapy for chronic low back pain: a randomized, controlled trial. *Pain Res Manag* 2006;11(3):193-196.
- [64] Geers A, Helfer S, Weiland P, Kosbab K. Expectations and Placebo Response: A Laboratory Investigation into the Role of Somatic Focus. *J Behav Med* 2006;29(2):171-178.
- [65] Geers AL, Wellman JA, Fowler SL, Helfer SG, France CR. Dispositional optimism predicts placebo analgesia. *J Pain* 2010;11(11):1165-1171.
- [66] Goffaux P, Redmond WJ, Rainville P, Marchand S. Descending analgesia--when the spine echoes what the brain expects. *Pain* 2007;130(1-2):137-143.
- [67] Goodenough B, Kempel L, Champion GD, Laubreaux L, Nicholas MK, Ziegler JB, McInerney M. An investigation of the placebo effect and age-related factors in the report of needle pain from venipuncture in children. *Pain* 1997;72(3):383-391.
- [68] Goodkin K, Gullion CM, Agras WS. A randomized, double-blind, placebo-controlled trial of trazodone hydrochloride in chronic low back pain syndrome. *J Clin Psychopharmacol* 1990;10(4):269-278.
- [69] Grevert P, Albert LH, Goldstein A. Partial antagonism of placebo analgesia by naloxone. *Pain* 1983;16(2):129-143.
- [70] Haake M, Muller HH, Schade-Brittinger C, Basler HD, Schafer H, Maier C, Endres HG, Trampisch HJ, Molsberger A. German acupuncture trials (GERAC) for chronic low back pain. Randomized, multicenter, blinded, parallel-group trial with 3 groups *Arch Intern Med* 2007;167(17):1892-1898.
- [71] Hale ME, Ahdiel H, Ma T, Rauck R. Efficacy and safety of OPANA ER (oxymorphone extended release) for relief of moderate to severe chronic low back pain in opioid-experienced patients: a 12-week, randomized, double-blind, placebo-controlled study. *The journal of pain : official journal of the American Pain Society* 2007;8(2):175-184.
- [72] Hargreaves A, Lander J. Use of Transcutaneous Electrical Nerve Stimulation For Postoperative Pain. *Nurs Res* 1989;38(3):159-160.
- [73] Hargreaves KM, Dionne RA, Mueller GP. Plasma Beta-Endorphin-like Immunoreactivity, Pain and Anxiety Following Administration of Placebo in Oral Surgery Patients. *J Dent Res* 1983;62(11):1170-1173.
- [74] Hashish I, Hai HK, Harvey W, Feinmann C, Harris M. Reduction of postoperative pain and swelling by ultrasound treatment: a placebo effect. *Pain* 1988;33(3):303-311.

- 1  
2  
3 [75] Hashish I, Harvey W, Harris M. Anti-inflammatory effects of ultrasound therapy: evidence for a  
4 major placebo effect. *Rheumatology (Oxford)* 1986;25(1):77-81.  
5  
6 [76] Helms JM. Acupuncture for the management of primary dysmenorrhea. *Obstet Gynecol*  
7 1987;69(1):51-56.  
8 [77] Hoirus KT, Pflieger B, McDuffie FC, Cotsonis G, Elsangak O, Hinson R, Verzosa GT. A randomized  
9 clinical trial comparing chiropractic adjustments to muscle relaxants for subacute low back  
10 pain. *J Manipulative Physiol Ther* 2004;27(6):388-398.  
11 [78] Hong C-Z, Chen Y-C, Pon CH, Yu J. Immediate Effects of Various Physical Medicine Modalities on  
12 Pain Threshold of an Active Myofascial Trigger Point. *Journal of Musculoskeletal Pain*  
13 1993;1(2):37-53.  
14  
15 [79] Hruby G, Ames C, Chen C, Yan Y, Sagar J, Baron P, Landman J. Assessment of efficacy of  
16 transcutaneous electrical nerve stimulation for pain management during office-based  
17 flexible cystoscopy. *Urology* 2006;67(5):914-917.  
18 [80] Hyland MR, Webber-Gaffney A, Cohen L, Lichtman SW. Randomized Controlled Trial of  
19 Calcaneal Taping, Sham Taping, and Plantar Fascia Stretching for the Short-Term  
20 Management of Plantar Heel Pain. *J Orthop Sports Phys Ther* 2006;36(6):364-371.  
21 [81] Johansen O, Brox J, Flaten MA. Placebo and Nocebo Responses, Cortisol, and Circulating Beta-  
22 Endorphin. *Psychosom Med* 2003;65(5):786-790.  
23 [82] Kaptchuk TJ, Stason WB, Davis RB, Legedza ATR, Schnyer RN, Kerr CE, Stone DA, Nam BH, Kirsch  
24 I, Goldman RH. Sham device v inert pill: randomised controlled trial of two placebo  
25 treatments. *Br Med J* 2006;332(7538):391-394.  
26  
27 [83] Katz J, Pennella-Vaughan J, Hetzel RD, Kanazi GE, Dworkin RH. A Randomized, Placebo-  
28 Controlled Trial of Bupropion Sustained Release in Chronic Low Back Pain. *J Pain*  
29 2005;6(10):656-661.  
30  
31 [84] Katz N, Ju WD, Krupa DA, Sperling RS, Bozalis Rodgers D, Gertz BJ, Gimbel J, Coleman S, Fisher C,  
32 Nabizadeh S, Borenstein D. Efficacy and safety of rofecoxib in patients with chronic low back  
33 pain: results from two 4-week, randomized, placebo-controlled, parallel-group, double-blind  
34 trials. *Spine (Phila Pa 1976)* 2003;28(9):851-858; discussion 859.  
35 [85] Katz N, Rauck R, Ahdieh H, Ma T, Gerritsen van der Hoop R, Kerwin R, Podolsky G. A 12-week,  
36 randomized, placebo-controlled trial assessing the safety and efficacy of oxymorphone  
37 extended release for opioid-naive patients with chronic low back pain. *Curr Med Res Opin*  
38 2007;23(1):117-128.  
39 [86] Keltner JR, Furst A, Fan C, Redfern R, Inglis B, Fields HL. Isolating the Modulatory Effect of  
40 Expectation on Pain Transmission: A Functional Magnetic Resonance Imaging Study. *The*  
41 *Journal of Neuroscience* 2006;26(16):4437-4443.  
42 [87] Kerr AR, Drexel CA, Spielman AI. The efficacy and safety of 50 mg penicillin G potassium troches  
43 for recurrent aphthous ulcers. *Oral Surg Oral Med Oral Pathol Oral Radiol Endod*  
44 2003;96(6):685-694.  
45 [88] Ketenci A, Ozcan E, Karamursel S. Assessment of efficacy and psychomotor performances of  
46 thicolchicoside and tizanidine in patients with acute low back pain. *Int J Clin Pract*  
47 2005;59(7):764-770.  
48 [89] Klaber Moffett JA, Richardson PH, Frost H, Osborn A. A placebo controlled double blind trial to  
49 evaluate the effectiveness of pulsed short wave therapy for osteoarthritic hip and knee pain.  
50 *Pain* 1996;67(1):121-127.  
51 [90] Klein RG, Eek BC. Low-energy laser treatment and exercise for chronic low back pain: double-  
52 blind controlled trial. *Arch Phys Med Rehabil* 1990;71(1):34-37.  
53 [91] Kober A, Scheck T, Greher M, Lieba F, Fleischhackl R, Fleischhackl S, Randunsky F, Hoerauf K.  
54 Prehospital Analgesia with Acupressure in Victims of Minor Trauma: A Prospective,  
55 Randomized, Double-Blinded Trial. *Anesth Analg* 2002;95(3):723-727 710.1213/0000539-  
56 200209000-200200035.  
57  
58  
59  
60

- 1  
2  
3 [92] Kong J, Gollub RL, Polich G, Kirsch I, LaViolette P, Vangel M, Rosen B, Kaptchuk TJ. A Functional  
4 Magnetic Resonance Imaging Study on the Neural Mechanisms of Hyperalgesic Nocebo  
5 Effect. *The Journal of Neuroscience* 2008;28(49):13354-13362.
- 6  
7 [93] Kong J, Gollub RL, Rosman IS, Webb JM, Vangel MG, Kirsch I, Kaptchuk TJ. Brain activity  
8 associated with expectancy-enhanced placebo analgesia as measured by functional  
9 magnetic resonance imaging. *J Neurosci* 2006;26(2):381-388.
- 10  
11 [94] Kotani N, Kushikata T, Suzuki A, Hashimoto H, Muraoka M, Matsuki A. Insertion of intradermal  
12 needles into painful points provides analgesia for intractable abdominal scar pain. *Reg*  
13 *Anesth Pain Med* 2001;26(6):532-538.
- 14  
15 [95] Kupers R, Maeyaert J, Boly M, Faymonville ME, Laureys S. Naloxone-insensitive epidural placebo  
16 analgesia in a chronic pain patient. *Anesthesiology* 2007;106(6):1239-1242.
- 17  
18 [96] Lander J, Fowler-Kerry S. TENS for children's procedural pain. *Pain* 1993;52(2):209-216.
- 19  
20 [97] Leibing E, Leonhardt U, Koster G, Goerlitz A, Rosenfeldt J, Hilgers R, Ramadori G. Acupuncture  
21 treatment of chronic low-back pain - a randomized, blinded, placebo-controlled trial with 9-  
22 month follow-up. *Pain* 2002;96 189-196.
- 23  
24 [98] Levine JD, Gordon NC. Influence of the method of drug administration on analgesic response.  
25 *Nature* 1984;312(5996):755-756.
- 26  
27 [99] Licciardone JC, Stoll ST, Fulda KG, Russo DP, Siu J, Winn W, Swift JJ. Osteopathic Manipulative  
28 Treatment for Chronic Low Back Pain: A Randomized Controlled Trial. *Spine*  
29 2003;28(13):1355-1362.
- 30  
31 [100] Lieberman MD, Jarcho JM, Berman S, Naliboff BD, Suyenobu BY, Mandelkern M, Mayer EA. The  
32 neural correlates of placebo effects: a disruption account. *Neuroimage* 2004;22(1):447-455.
- 33  
34 [101] Limoges MF, Rickabaugh B. Evaluation of TENS During Screening Flexible Sigmoidoscopy.  
35 *Gastroenterol Nurs* 2004;27(2):61-68.
- 36  
37 [102] Lin J-G, Lo M-W, Wen Y-R, Hsieh C-L, Tsai S-K, Sun W-Z. The effect of high and low frequency  
38 electroacupuncture in pain after lower abdominal surgery. *Pain* 2002;99(3):509-514.
- 39  
40 [103] Linde K, Streng A, Jurgens S, Hoppe A, Brinkhaus B, Witt C, Wagenpfeil S, Pfaffenrath V,  
41 Hammes MG, Weidenhammer W, Willich SN, Melchart D. Acupuncture for patients with  
42 migraine. A randomized controlled trial. *Journal of the American Medical Association*  
43 2005;293 (2118):2125.
- 44  
45 [104] Lioffi C, Hatira P. Clinical Hypnosis in the Alleviation of Procedure-Related Pain in Pediatric  
46 Oncology Patients. *Int J Clin Exp Hypn* 2003;51(1):4-28.
- 47  
48 [105] Lipman JJ, Miller BE, Mays KS, Miller MN, North WC, Byrne WL. Peak B endorphin  
49 concentration in cerebrospinal fluid: reduced in chronic pain patients and increased during  
50 the placebo response. *Psychopharmacology (Berl)* 1990;102(1):112-116.
- 51  
52 [106] Manchikanti L, Pampati V, Damron K. The role of placebo and nocebo effects of perioperative  
53 administration of sedatives and opioids in interventional pain management. *Pain Physician*  
54 2005;8(4):349-355.
- 55  
56 [107] Martikainen IK, Hagelberg N, Mansikka H, Hietala J, Någren K, Scheinin H, Pertovaara A.  
57 Association of striatal dopamine D2/D3 receptor binding potential with pain but not tactile  
58 sensitivity or placebo analgesia. *Neurosci Lett* 2005;376(3):149-153.
- 59  
60 [108] Matre D, Casey KL, Knardahl S. Placebo-Induced Changes in Spinal Cord Pain Processing. *The*  
*Journal of Neuroscience* 2006;26(2):559-563.
- [109] Mayberg HS, Silva JA, Brannan SK, Tekell JL, Mahurin RK, McGinnis S, Jerabek PA. The  
functional neuroanatomy of the placebo effect. *A J Psychiatry* 2002;159(5):728-737.
- [110] Melchart D, Streng A, Hoppe A, Brinkhaus B, Witt C, Wagenpfeil S, Pfaffenrath V, Hammes M,  
Hummelsberger J, Irnich D, Weidenhammer W, Willich SN, Linde K. Acupuncture in patients  
with tension-type headache: randomised controlled trial. *Br Med J* 2005;331 376-382.
- [111] Molsberger AF, Mau J, Pawelec DB, Winkler J. Does acupuncture improve the orthopedic  
management of chronic low back pain – a randomized, blinded, controlled trial with 3  
months follow up. *Pain* 2002;99(3):579-587.

- 1  
2  
3  
4 [112] Montgomery G, Kirsch I. Mechanisms of Placebo Pain Reduction: An Empirical Investigation. *Psychological Science* 1996;7(3):174-176.
- 5  
6 [113] Montgomery GH, Kirsch I. Classical conditioning and the placebo effect. *Pain* 1997;72(1-2):107-  
7 113.
- 8 [114] Morton DL, Watson A, El-Deredy W, Jones AKP. Reproducibility of placebo analgesia: Effect of  
9 dispositional optimism. *Pain* 2009;146(1&#2):194-198.
- 10 [115] Muehlbacher M, Nickel MK, Kettler C, Tritt K, Lahmann C, Leiberich PK, Nickel C, Krawczyk J,  
11 Mitterlehner FO, Rother WK, Loew TH, Kaplan P. Topiramate in treatment of patients with  
12 chronic low back pain: a randomized, double-blind, placebo-controlled study. *Clin J Pain*  
13 2006;22(6):526-531.
- 14 [116] Nemoto H, Nemoto Y, Toda H, Mikuni M, Fukuyama H. Placebo analgesia: a PET study. *Exp*  
15 *Brain Res* 2007;179(4):655-664.
- 16 [117] Ockene JK, Barad DH, Cochrane BB, Larson JC, Gass M, Wassertheil-Smoller S, Manson JE,  
17 Barnabei VM, Lane DS, Brzyski RG, Rosal MC, Wylie-Rosett J, Hays J. Symptom experience  
18 after discontinuing use of estrogen plus progestin. *JAMA* 2005;294(2):183-193.
- 19 [118] Pally RM, Seger W, Adler JL, Ettlinger RE, Quaidoo EA, Lipetz R, O'Brien K, Mucciola L, Skalky  
20 CS, Petruschke RA, Bohidar NR, Geba GP. Etoricoxib reduced pain and disability and  
21 improved quality of life in patients with chronic low back pain: a 3 month, randomized,  
22 controlled trial. *Scand J Rheumatol* 2004;33(4):257-266.
- 23 [119] Pariente J, White P, Frackowiak RSJ, Lewith G. Expectancy and belief modulate the neuronal  
24 substrates of pain treated by acupuncture. *Neuroimage* 2005;25(4):1161-1167.
- 25 [120] Peloso PM, Fortin L, Beaulieu A, Kamin M, Rosenthal N. Analgesic efficacy and safety of  
26 tramadol/ acetaminophen combination tablets (Ultracet) in treatment of chronic low back  
27 pain: a multicenter, outpatient, randomized, double blind, placebo controlled trial. *J*  
28 *Rheumatol* 2004;31(12):2454-2463.
- 29 [121] Petrovic P, Kalso E, Petersson KM, Ingvar M. Placebo and opioid analgesia-- imaging a shared  
30 neuronal network. *Science* 2002;295(5560):1737-1740.
- 31 [122] Pollo A, Amanzio M, Arslanian A, Casadio C, Maggi G, Benedetti F. Response expectancies in  
32 placebo analgesia and their clinical relevance. *Pain* 2001;93(1):77-84.
- 33 [123] Pollo A, Vighetti S, Rainero I, Benedetti F. Placebo analgesia and the heart. *Pain* 2003;102(1-  
34 2):125-133.
- 35 [124] Preyde M. Effectiveness of massage therapy for subacute low-back pain: a randomized  
36 controlled trial. *Can Med Assoc J* 2000;162(13):1815-1820.
- 37 [125] Price DD, Craggs J, Nicholas Verne G, Perlstein WM, Robinson ME. Placebo analgesia is  
38 accompanied by large reductions in pain-related brain activity in irritable bowel syndrome  
39 patients. *Pain* 2007;127(1):63-72.
- 40 [126] Price DD, Long S, Wilsey B, Rafii A. Analysis of peak magnitude and duration of analgesia  
41 produced by local anesthetics injected into sympathetic ganglia of complex regional pain  
42 syndrome patients. *Clin J Pain* 1998;14(3):216-226.
- 43 [127] Price DD, Milling LS, Kirsch I, Duff A, Montgomery GH, Nicholls SS. An analysis of factors that  
44 contribute to the magnitude of placebo analgesia in an experimental paradigm. *Pain*  
45 1999;83(2):147-156.
- 46 [128] Rainville P, Duncan GH, Price DD, Carrier B, Bushnell MC. Pain affect encoded in human  
47 anterior cingulate but not somatosensory cortex. *Science* 1997;277(5328):968-971.
- 48 [129] Rawling MJ, Wiebe ER. A randomized controlled trial of fentanyl for abortion pain. *Am J Obstet*  
49 *Gynecol* 2001;185(1):103-107.
- 50 [130] Ristikankare M, Hartikainen J, Heikkinen M, Janatuinen E, Julkunen R. Is routinely given  
51 conscious sedation of benefit during colonoscopy? *Gastrointest Endosc* 1999;49(5):566-572.
- 52 [131] Robinson R, Darlow S, Wright SJ, Watters C, Carr I, Gadsby G, Mayberry J. Is transcutaneous  
53 electrical nerve stimulation an effective analgesia during colonoscopy? *Postgrad Med J*  
54 2001;77(909):445-446.
- 55  
56  
57  
58  
59  
60



- 1  
2  
3 [132] Rowbotham MC, Davies PS, Verkempinck C, Galer BS. Lidocaine patch: double-blind controlled  
4 study of a new treatment method for post-herpetic neuralgia. *Pain* 1996;65(1):39-44.  
5 [133] Ruoff GE, Rosenthal N, Jordan D, Karim R, Kamin M. Tramadol/Acetaminophen combination  
6 tablets for the treatment of chronic lower back pain: A multicenter, randomized, double-  
7 blind, placebo-controlled outpatient study. *Clin Ther* 2003;25(4):1123-1141.  
8 [134] Sanders GE, Reinert O, Tepe R, Maloney P. Chiropractic adjustive manipulation on subjects  
9 with acute low back pain: visual analog pain scores and plasma beta-endorphin levels. *J*  
10 *Manipulative Physiol Ther* 1990;13(7):391-395.  
11 [135] Scharf HP, Mansmann U, Streitberger K, Witte S, Kramer J, Maier C, Trampisch HJ, Victor N.  
12 Acupuncture and knee osteoarthritis: A three-armed randomized trial. *Ann Intern Med*  
13 2006;145(1):12-20.  
14 [136] Scharff L, Marcus DA, Masek BJ. A Controlled Study of Minimal-Contact Thermal Biofeedback  
15 Treatment in Children With Migraine. *J Pediatr Psychol* 2002;27(2):109-119.  
16 [137] Schnebel BE, Simmons JW. The use of oral colchicine for low-back pain. A double-blind study.  
17 *Spine (Phila Pa 1976)* 1988;13(3):354-357.  
18 [138] Schnitzer TJ, Gray WL, Paster RZ, Kamin M. Efficacy of tramadol in treatment of chronic low  
19 back pain. *J Rheumatol* 2000;27(3):772-778.  
20 [139] Scott DJ, Stohler CS, Egnatuk CM, Wang H, Koeppe RA, Zubieta J-K. Individual Differences in  
21 Reward Responding Explain Placebo-Induced Expectations and Effects. *Neuron*  
22 2007;55(2):325-336.  
23 [140] Scott DJ, Stohler CS, Egnatuk CM, Wang H, Koeppe RA, Zubieta J. Placebo and nocebo effects  
24 are defined by opposite opioid and dopaminergic responses. *Arch Gen Psychiatry*  
25 2008;65(2):220-231.  
26 [141] Snyder-Mackler L, Barry AJ, Perkins AI, Soucek MD. Effects of helium-neon laser irradiation on  
27 skin resistance and pain in patients with trigger points in the neck or back. *Phys Ther*  
28 1989;69(5):336-341.  
29 [142] Soriano F, Rios R. Gallium arsenide laser treatment of chronic low back pain: A prospective,  
30 randomized and double blind study. *Laser Therapy* 1998;10(4):175-180.  
31 [143] Stransky M, Rubin A, Lava NS, Lazaro RP. Treatment of carpal tunnel syndrome with vitamin  
32 B6: a double-blind study. *South Med J* 1989;82(7):841-842.  
33 [144] Szpalski M, Hayez JP. Objective functional assessment of the efficacy of tenoxicam in the  
34 treatment of acute low back pain. A double-blind placebo-controlled study. *Br J Rheumatol*  
35 1994;33(1):74-78.  
36 [145] Tashjian RZ, Banerjee R, Bradley MP, Alford W, Fadale PD. Zolpidem reduces postoperative  
37 pain, fatigue, and narcotic consumption following knee arthroscopy: a prospective  
38 randomized placebo-controlled double-blinded study. *J Knee Surg* 2006;19(2):105-111.  
39 [146] Theroux MC, West DW, Corddry DH, Hyde PM, Bachrach SJ, Cronan KM, Kettrick RG. Efficacy of  
40 intranasal midazolam in facilitating suturing of lacerations in preschool children in the  
41 emergency department. *Pediatrics* 1993;91(3):624-627.  
42 [147] Thomas KS, Muir KR, Doherty M, Jones AC, O'Reilly SC, Bassey EJ. Home based exercise  
43 programme for knee pain and knee osteoarthritis: randomised controlled trial. *BMJ*  
44 2002;325(7367):752.  
45 [148] Toya S, Motegi M, Inomata K, Ohshiro T, Macda T. Report on a computer-randomized double  
46 blind clinical trial to determine the effectiveness of the GaAlAs (830 nm) diode laser for pain  
47 attenuation in selected pain groups. *Laser Therapy* 1994;6:143-148.  
48 [149] Tritrakarn T, Lertakyamanee J, Koompong P, Soontrapa S, Somprakit P, Tantiwong A, Jittapapai  
49 S. Both EMLA and Placebo Cream Reduced Pain during Extracorporeal Piezoelectric Shock  
50 Wave Lithotripsy with the Piezolith 2300. *Anesthesiology* 2000;92(4):1049-1054.  
51 [150] Vase L, Robinson ME, Verne GN, Price DD. The contributions of suggestion, desire, and  
52 expectation to placebo effects in irritable bowel syndrome patients: An empirical  
53 investigation. *Pain* 2003;105(1-2):17-25.  
54  
55  
56  
57  
58  
59  
60

- 1  
2  
3 [151] Vase L, Robinson ME, Verne GN, Price DD. Increased placebo analgesia over time in irritable  
4 bowel syndrome (IBS) patients is associated with desire and expectation but not  
5 endogenous opioid mechanisms. *Pain* 2005;115(3):338-347.  
6  
7 [152] Verne GN, Robinson ME, Vase L, Price DD. Reversal of visceral and cutaneous hyperalgesia by  
8 local rectal anesthesia in irritable bowel syndrome (IBS) patients. *Pain* 2003;105(1):223-230.  
9  
10 [153] Vondrackova D, Leyendecker P, Meissner W, Hopp M, Szombati I, Hermanns K, Ruckes C,  
11 Weber S, Grothe B, Fleischer W, Reimer K. Analgesic efficacy and safety of oxycodone in  
12 combination with naloxone as prolonged release tablets in patients with moderate to severe  
13 chronic pain. *The journal of pain : official journal of the American Pain Society*  
14 2008;9(12):1144-1154.  
15  
16 [154] Vorsanger GJ, Xiang J, Gana TJ, Pascual ML, Fleming RR. Extended-release tramadol (tramadol  
17 ER) in the treatment of chronic low back pain. *J Opioid Manag* 2008;4(2):87-97.  
18  
19 [155] Voudouris NJ, Peck CL, Coleman G. Conditioned placebo responses. *J Pers Soc Psychol*  
20 1985;48(1):47-53.  
21  
22 [156] Voudouris NJ, Peck CL, Coleman G. Conditioned response models of placebo phenomena:  
23 further support. *Pain* 1989;38(1):109-116.  
24  
25 [157] Voudouris NJ, Peck CL, Coleman G. The role of conditioning and verbal expectancy in the  
26 placebo response. *Pain* 1990;43(1):121-128.  
27  
28 [158] Wager TD, Matre D, Casey KL. Placebo effects in laser-evoked pain potentials. *Brain Behav*  
29 *Immun* 2006;20(3):219-230.  
30  
31 [159] Wager TD, Rilling JK, Smith EE, Sokolik A, Casey KL, Davidson RJ, Kosslyn SM, Rose RM, Cohen  
32 JD. Placebo-Induced Changes in fMRI in the Anticipation and Experience of Pain. *Science*  
33 2004;303(5661):1162-1167.  
34  
35 [160] Wager TD, Scott DJ, Zubieta J-K. Placebo effects on human  $\mu$ -opioid activity during pain.  
36 *Proceedings of the National Academy of Sciences* 2007;104(26):11056-11061.  
37  
38 [161] Walton RE, Chiappinelli J. Prophylactic penicillin: effect on posttreatment symptoms following  
39 root canal treatment of asymptomatic periapical pathosis. *J Endod* 1993;19(9):466-470.  
40  
41 [162] Wang B, Tang J, White PF, Naruse R, Sloninsky A, Kariger R, Gold J, Wender RH. Effect of the  
42 Intensity of Transcutaneous Acupoint Electrical Stimulation on the Postoperative Analgesic  
43 Requirement. *Anesth Analg* 1997;85(2):406-413.  
44  
45 [163] Watson A, El-Derey W, Bentley DE, Vogt BA, Jones AKP. Categories of placebo response in the  
46 absence of site-specific expectation of analgesia. *Pain* 2006;126(1):115-122.  
47  
48 [164] Watson A, El-Derey W, Vogt BA, Jones AKP. Placebo analgesia is not due to compliance or  
49 habituation: EEG and behavioural evidence. *Neuroreport* 2007;18(8):771-775  
50 710.1097/WNR.1090b1013e3280c1091e1092a1098.  
51  
52 [165] Webster LR, Butera PG, Moran LV, Wu N, Burns LH, Friedmann N. Oxytrex minimizes physical  
53 dependence while providing effective analgesia: a randomized controlled trial in low back  
54 pain. *The journal of pain : official journal of the American Pain Society* 2006;7(12):937-946.  
55  
56 [166] Witt C, Brinkhaus B, Jena S, Linde K, Streng A, Wagenpfeil S, Hummelsberger J, Walther HU,  
57 Melchart D, Willich SN. Acupuncture in patients with osteoarthritis of the knee: a  
58 randomised trial. *Lancet* 2005;366 136-143.  
59  
60 [167] Wu M-T, Sheen J-M, Chuang K-H, Yang P, Chin S-L, Tsai C-Y, Chen C-J, Liao J-R, Lai P-H, Chu K-A,  
Pan H-B, Yang C-F. Neuronal Specificity of Acupuncture Response: A fMRI Study with  
Electroacupuncture. *Neuroimage* 2002;16(4):1028-1037.  
[168] Zubieta JK, Bueller JA, Jackson LR, Scott DJ, Xu Y, Koeppe RA, Nichols TE, Stohler CS. Placebo  
Effects Mediated by Endogenous Opioid Activity on  $\alpha$ -Opioid Receptors. *The Journal of  
Neuroscience* 2005;25(34):7754-7762.  
[169] Zubieta JK, Yau WY, Scott DJ, Stohler CS. Belief or Need? Accounting for individual variations in  
the neurochemistry of the placebo effect. *Brain Behav Immun* 2006;20(1):15-26.



# PRISMA 2009 Checklist

| Section/topic                      | #  | Checklist item                                                                                                                                                                                                                                                                                              | Reported on page # |
|------------------------------------|----|-------------------------------------------------------------------------------------------------------------------------------------------------------------------------------------------------------------------------------------------------------------------------------------------------------------|--------------------|
| <b>TITLE</b>                       |    |                                                                                                                                                                                                                                                                                                             |                    |
| Title                              | 1  | Identify the report as a systematic review, meta-analysis, or both.                                                                                                                                                                                                                                         | n/a                |
| <b>ABSTRACT</b>                    |    |                                                                                                                                                                                                                                                                                                             |                    |
| Structured summary                 | 2  | Provide a structured summary including, as applicable: background; objectives; data sources; study eligibility criteria, participants, and interventions; study appraisal and synthesis methods; results; limitations; conclusions and implications of key findings; systematic review registration number. | n/a                |
| <b>INTRODUCTION</b>                |    |                                                                                                                                                                                                                                                                                                             |                    |
| Rationale                          | 3  | Describe the rationale for the review in the context of what is already known.                                                                                                                                                                                                                              | 3                  |
| Objectives                         | 4  | Provide an explicit statement of questions being addressed with reference to participants, interventions, comparisons, outcomes, and study design (PICOS).                                                                                                                                                  | n/a                |
| <b>METHODS</b>                     |    |                                                                                                                                                                                                                                                                                                             |                    |
| Protocol and registration          | 5  | Indicate if a review protocol exists, if and where it can be accessed (e.g., Web address), and, if available, provide registration information including registration number.                                                                                                                               | n/a                |
| Eligibility criteria               | 6  | Specify study characteristics (e.g., PICOS, length of follow-up) and report characteristics (e.g., years considered, language, publication status) used as criteria for eligibility, giving rationale.                                                                                                      | 5                  |
| Information sources                | 7  | Describe all information sources (e.g., databases with dates of coverage, contact with study authors to identify additional studies) in the search and date last searched.                                                                                                                                  | 4                  |
| Search                             | 8  | Present full electronic search strategy for at least one database, including any limits used, such that it could be repeated.                                                                                                                                                                               | n/a                |
| Study selection                    | 9  | State the process for selecting studies (i.e., screening, eligibility, included in systematic review, and, if applicable, included in the meta-analysis).                                                                                                                                                   | 4, Fig1            |
| Data collection process            | 10 | Describe method of data extraction from reports (e.g., piloted forms, independently, in duplicate) and any processes for obtaining and confirming data from investigators.                                                                                                                                  | 6                  |
| Data items                         | 11 | List and define all variables for which data were sought (e.g., PICOS, funding sources) and any assumptions and simplifications made.                                                                                                                                                                       | 6                  |
| Risk of bias in individual studies | 12 | Describe methods used for assessing risk of bias of individual studies (including specification of whether this was done at the study or outcome level), and how this information is to be used in any data synthesis.                                                                                      | n/a                |
| Summary measures                   | 13 | State the principal summary measures (e.g., risk ratio, difference in means).                                                                                                                                                                                                                               | n/a                |
| Synthesis of results               | 14 | Describe the methods of handling data and combining results of studies, if done, including measures of consistency (e.g., $I^2$ ) for each meta-analysis.                                                                                                                                                   | 6                  |

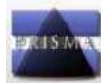

# PRISMA 2009 Checklist

| Section/topic                 | #  | Checklist item                                                                                                                                                                                           | Reported on page # |
|-------------------------------|----|----------------------------------------------------------------------------------------------------------------------------------------------------------------------------------------------------------|--------------------|
| Risk of bias across studies   | 15 | Specify any assessment of risk of bias that may affect the cumulative evidence (e.g., publication bias, selective reporting within studies).                                                             | n/a                |
| Additional analyses           | 16 | Describe methods of additional analyses (e.g., sensitivity or subgroup analyses, meta-regression), if done, indicating which were pre-specified.                                                         | n/a                |
| <b>RESULTS</b>                |    |                                                                                                                                                                                                          |                    |
| Study selection               | 17 | Give numbers of studies screened, assessed for eligibility, and included in the review, with reasons for exclusions at each stage, ideally with a flow diagram.                                          | Fig1               |
| Study characteristics         | 18 | For each study, present characteristics for which data were extracted (e.g., study size, PICOS, follow-up period) and provide the citations.                                                             | n/a                |
| Risk of bias within studies   | 19 | Present data on risk of bias of each study and, if available, any outcome level assessment (see item 12).                                                                                                | n/a                |
| Results of individual studies | 20 | For all outcomes considered (benefits or harms), present, for each study: (a) simple summary data for each intervention group (b) effect estimates and confidence intervals, ideally with a forest plot. | n/a                |
| Synthesis of results          | 21 | Present results of each meta-analysis done, including confidence intervals and measures of consistency.                                                                                                  | n/a                |
| Risk of bias across studies   | 22 | Present results of any assessment of risk of bias across studies (see Item 15).                                                                                                                          | n/a                |
| Additional analysis           | 23 | Give results of additional analyses, if done (e.g., sensitivity or subgroup analyses, meta-regression [see Item 16]).                                                                                    | n/a                |
| <b>DISCUSSION</b>             |    |                                                                                                                                                                                                          |                    |
| Summary of evidence           | 24 | Summarize the main findings including the strength of evidence for each main outcome; consider their relevance to key groups (e.g., healthcare providers, users, and policy makers).                     | 21                 |
| Limitations                   | 25 | Discuss limitations at study and outcome level (e.g., risk of bias), and at review-level (e.g., incomplete retrieval of identified research, reporting bias).                                            | 22-3               |
| Conclusions                   | 26 | Provide a general interpretation of the results in the context of other evidence, and implications for future research.                                                                                  | 22-3               |
| <b>FUNDING</b>                |    |                                                                                                                                                                                                          |                    |
| Funding                       | 27 | Describe sources of funding for the systematic review and other support (e.g., supply of data); role of funders for the systematic review.                                                               | 1                  |

From: Moher D, Liberati A, Tetzlaff J, Altman DG, The PRISMA Group (2009). Preferred Reporting Items for Systematic Reviews and Meta-Analyses: The PRISMA Statement. PLoS Med 6(7): e1000097. doi:10.1371/journal.pmed1000097

For more information, visit: [www.prisma-statement.org](http://www.prisma-statement.org).

# BMJ Open

## What Techniques Might be Used to Harness Placebo Effects in Non-Malignant Pain? A Literature Review and Survey to Develop a Taxonomy.

|                                 |                                                                                                                                                                                                                                                                                                                                                                                                                                                                                                                                                        |
|---------------------------------|--------------------------------------------------------------------------------------------------------------------------------------------------------------------------------------------------------------------------------------------------------------------------------------------------------------------------------------------------------------------------------------------------------------------------------------------------------------------------------------------------------------------------------------------------------|
| Journal:                        | <i>BMJ Open</i>                                                                                                                                                                                                                                                                                                                                                                                                                                                                                                                                        |
| Manuscript ID                   | bmjopen-2016-015516.R2                                                                                                                                                                                                                                                                                                                                                                                                                                                                                                                                 |
| Article Type:                   | Research                                                                                                                                                                                                                                                                                                                                                                                                                                                                                                                                               |
| Date Submitted by the Author:   | 28-Apr-2017                                                                                                                                                                                                                                                                                                                                                                                                                                                                                                                                            |
| Complete List of Authors:       | Bishop, Felicity; University of Southampton, Psychology<br>Coghlan, Beverly; University of Southampton<br>Geraghty, Adam; University of Southampton, Primary Care and Population Sciences<br>Everitt, Hazel; University of Southampton, Primary Care and Population Sciences, Faculty of Medicine<br>Little, Paul; University of Southampton, Primary Care and Population Science;<br>Holmes, Michelle; University of Southampton, Psychology<br>Seretis, Dionysis; University of Southampton, Psychology<br>Lewith, George; University of Southampton |
| <b>Primary Subject Heading</b>: | Complementary medicine                                                                                                                                                                                                                                                                                                                                                                                                                                                                                                                                 |
| Secondary Subject Heading:      | General practice / Family practice, Research methods, Rheumatology, Rehabilitation medicine                                                                                                                                                                                                                                                                                                                                                                                                                                                            |
| Keywords:                       | placebos, placebo effect, nocebo effect, translational research, review, classification                                                                                                                                                                                                                                                                                                                                                                                                                                                                |
|                                 |                                                                                                                                                                                                                                                                                                                                                                                                                                                                                                                                                        |

SCHOLARONE™  
Manuscripts

1  
2  
3  
4  
5 **1 What Techniques Might be Used to Harness Placebo Effects in Non-**  
6 **2 Malignant Pain? A Literature Review and Survey to Develop a**  
7 **3 Taxonomy.**  
8  
9  
10  
11  
12

13 Running head: Taxonomy of techniques to harness placebo effects  
14

15 Authors: Felicity L Bishop PhD <sup>a,b</sup>, Beverly Coghlan MSc <sup>b</sup>, Adam WA Geraghty PhD <sup>b</sup>, Hazel Everitt  
16 PhD <sup>b</sup>, Paul Little FMedSci <sup>b</sup>, Michelle M Holmes MRes <sup>a</sup>, Dionysis Seretis MRes <sup>a</sup>, George Lewith  
17 MRCGP <sup>b</sup>  
18  
19

20  
21 a. Department of Psychology, Faculty of Social Human and Mathematical Sciences, Building 44  
22 Highfield Campus, University of Southampton, Southampton SO17 1BJ United Kingdom.  
23

24  
25 b. Primary Care and Population Sciences, Aldermoor Health Centre, University of Southampton,  
26 Southampton, SO16 5ST, United Kingdom.  
27  
28

29 Emails: Felicity Bishop: [F.L.Bishop@southampton.ac.uk](mailto:F.L.Bishop@southampton.ac.uk); Beverly Coghlan:  
30 [beverly101@btinternet.com](mailto:beverly101@btinternet.com); Adam Geraghty: [A.W.Geraghty@soton.ac.uk](mailto:A.W.Geraghty@soton.ac.uk); Hazel Everitt:  
31 [H.A.Everitt@soton.ac.uk](mailto:H.A.Everitt@soton.ac.uk); Paul Little: [P.Little@soton.ac.uk](mailto:P.Little@soton.ac.uk); Michelle Holmes:  
32 [M.M.Holmes@soton.ac.uk](mailto:M.M.Holmes@soton.ac.uk); Dionysis Seretis: [ds2g14@soton.ac.uk](mailto:ds2g14@soton.ac.uk); George Lewith: [gl3@soton.ac.uk](mailto:gl3@soton.ac.uk).  
33  
34  
35

36 Corresponding author: Felicity L Bishop. Email: [F.L.Bishop@southampton.ac.uk](mailto:F.L.Bishop@southampton.ac.uk). Phone: +44 (0)23  
37 8059 9020. Fax: +44 (0)23 8059 4597. Psychology, Faculty of Social and Human Sciences, Building  
38 44 Highfield Campus, University of Southampton, Southampton SO17 1BJ United Kingdom.  
39  
40  
41

42  
43  
44  
45  
46  
47  
48  
49  
50  
51  
52  
53  
54  
55  
56  
57  
58  
59  
60

21

1  
2  
3 22**Abstract**

4  
5  
6 23 Objectives. Placebo effects can be clinically meaningful but are seldom fully exploited in clinical  
7  
8 24 practice. This review aimed to facilitate translational research by producing a taxonomy of  
9  
10 25 techniques that could augment placebo analgesia in clinical practice.

11  
12  
13 26 Design. Literature review and survey.

14  
15  
16 27 Methods. We systematically analysed methods which could plausibly be used to elicit placebo  
17  
18 28 effects in 169 clinical and laboratory-based studies involving non-malignant pain, drawn from 7  
19  
20 29 systematic reviews. In a validation exercise we surveyed 33 leading placebo researchers (M=12  
21  
22 30 years' research experience, SD=9.8), who were asked to comment on and add to the draft taxonomy  
23  
24 31 derived from the literature.

25  
26  
27 32 Results. The final taxonomy defines 30 procedures that may contribute to placebo effects in clinical  
28  
29 33 and experimental research, proposes 60 possible clinical applications, and classifies procedures into  
30  
31 34 5 domains: the *Patient's Characteristics and Belief* (5 procedures and 11 clinical applications); the  
32  
33 35 *Practitioner's Characteristics and Beliefs* (2 procedures and 4 clinical applications); the *Healthcare*  
34  
35 36 *Setting* (8 procedures and 13 clinical applications); *Treatment Characteristics* (8 procedures and 14  
36  
37 37 clinical applications); and the *Patient-Practitioner Interaction* (7 procedures and 18 clinical  
38  
39 38 applications).

40  
41 39 Conclusions. The taxonomy provides a preliminary and novel tool with potential to guide  
42  
43 40 translational research aiming to harness placebo effects for patient benefit in practice.

44  
45 41 Keywords: placebos; placebo effect; nocebo effect; translational research; review; classification  
46  
47 42

48  
49  
50  
51  
52  
53  
54  
55  
56  
57  
58  
59  
60

## Article Summary

### Strengths and Limitations of this Study

- This is a novel attempt to use existing studies to identify the factors that might contribute to placebo effects and the associated procedures that could be simply and ethically adapted for clinical practice, subject to further testing .
- We drew on both clinical trials and laboratory-based studies of placebo effects, in order to generate a more comprehensive list of factors that might contribute to placebo effects than would be possible by relying on just one literature.
- A systematic approach to data synthesis, based on qualitative research methods, was used to identify and classify procedures that might contribute to placebo effects in clinical trials.
- The development of the taxonomy did not incorporate very recent placebo trials or studies and the selection of reviews used to determine which original studies to include in the development process was somewhat arbitrary.
- Our taxonomy is presented not as an exhaustive compilation of current methods used in placebo research but as a detailed and systematic guide for future research, which can in turn further refine the taxonomy.



## Introduction

There is compelling evidence that factors other than the so-called active components of treatment can have clinically meaningful effects on symptoms, particularly non-malignant pain<sup>1-4</sup>. Such 'placebo effects' can be defined as the physiological and/or psychological changes that result from the meaning derived by a person in a health care setting<sup>5,6</sup>. Expectations – which can be generated, for example, by verbal suggestion or previous experience - play a key role in placebo effects.<sup>7</sup> These effects may be as large as treatment effects<sup>8</sup> and occur throughout medicine, especially when doctors and patients interact with each other. They are not routinely deliberately harnessed for patient benefit in clinical practice<sup>9</sup>, possibly because doctors often assume they must deceive patients in order to elicit placebo effects<sup>10,11</sup>. However, this assumption is mistaken because it is not necessary to prescribe placebos in order to elicit placebo effects. For example, the overall analgesic effect of an opioid derives not only from its specific pharmaceutical actions but also from its psychological components, i.e. the *expectations* and *meaning* that the patient derives when consulting the doctor and taking the medicine<sup>12,13</sup>. The same is true for other types of intervention including physical, surgical, and psychotherapies. One approach that has received initial support is for doctors to use positive suggestion to enhance patients' expectations of benefit<sup>4</sup>. Furthermore, preliminary evidence suggests that openly prescribing placebos might elicit clinically meaningful placebo effects in IBS and depression<sup>14,15</sup> although this approach entails its own set of ethical challenges<sup>16,17</sup>.

Placebo researchers have called for more translational research in this field<sup>11,18-20</sup>. Such work has thus far typically focused on ethical considerations and narrative approaches to drawing out implications for clinical practice from the placebo literature. We suggest a systematic approach to translational research might be helpful. Many techniques or procedures contribute to placebo effects and could potentially be simply and ethically adapted for clinical practice, subject to further

1  
2  
3 85 testing in practice settings<sup>21</sup>. In order to identify and describe such techniques, and thus provide  
4  
5 86 some direction for future research, we reviewed experimental and clinical studies of placebo effects  
6  
7 87 in non-malignant pain. We focused on non-malignant pain because it can be difficult to manage  
8  
9 88 (particularly with current concerns about opioids<sup>22</sup>), the mechanisms underpinning placebo  
10  
11 89 analgesia are reasonably well understood<sup>23</sup>, laboratory-based experimental studies often focus on  
12  
13 90 placebo analgesia, and patients with pain have been shown to display substantial and clinically  
14  
15 91 significant placebo effects<sup>1</sup>. The aim of this project was to facilitate translational research by  
16  
17 92 producing a taxonomy of techniques that may contribute to placebo effects observed in research  
18  
19 93 settings and could be studied as options for augmenting placebo enhancement of analgesia in  
20  
21 94 clinical practice.  
22  
23  
24  
25  
26  
27

## 28 96 **Methods**

### 29 97 30 98 **Literature Search**

31 99 We selected seven systematic reviews of different aspects of the placebo literature, chosen from  
32  
33 100 recent reviews available at the time (2012) and based on expert opinion (within the research team)  
34  
35 101 to enable the extraction of information on placebo procedures from a broad range of settings -  
36  
37 102 comprehensive reviews<sup>24-26</sup>, reviews of placebo effects in clinical populations<sup>2 27</sup> and reviews of  
38  
39 103 laboratory-based experimental placebo studies<sup>28 29</sup>. The key consideration was that this collection  
40  
41 104 of reviews should cite a diverse set of studies likely to be using diverse methods to directly (e.g.  
42  
43 105 placebo mechanisms studies) or indirectly (e.g. clinical trials with placebo controls) study placebo  
44  
45 106 effects. After removing duplicates and ineligible studies (see Figure 1), 169 studies were used to  
46  
47 107 develop the taxonomy (for a list of included studies see Supplementary Digital Content).  
48  
49  
50  
51  
52  
53  
54  
55  
56  
57  
58  
59  
60

1  
2  
3 109  
4  
5  
6 110  
7  
8  
9 111  
10

11 112 Studies were eligible for inclusion if they: reported original research in which some participants  
12 received a placebo intervention; reported a non-malignant pain outcome; were published since 1983;  
13 113 and were published in English language. Studies were excluded if they: were published before 1983  
14 114 (because (a) means of generating context-dependent placebo effects may be sensitive to social and  
15 115 cultural changes over time, e.g. patient preferences for particular communication styles and thus  
16 116 their effectiveness in modifying expectations may have changed over time and (b) this yielded a  
17 117 manageable number of papers to analyse which had been published during the 30 years preceding  
18 118 this analysis); or examined any type of psychotherapeutic interventions (because it is difficult to  
19 119 disentangle the active components of psychotherapy from the effect of the meaning of the  
20 120 intervention<sup>30</sup>).

21  
22  
23  
24  
25  
26  
27  
28  
29  
30  
31  
32  
33  
34 122  
35

### 36 123 **Data Extraction and Synthesis**

37 124 Descriptions of all events that occurred in the placebo groups during each of the 169 studies (e.g.  
38 125 medical, administrative, and ethical procedures) were extracted into a piloted form by one author  
39 126 and checked by a second. These events were reviewed for duplication and overlap. This resulted in  
40 127 an initial list of 43 procedures that might contribute to placebo effects (e.g. informed consent  
41 128 processes, taking placebo pills, conditioning protocols). Study authors were not contacted for  
42 129 further information about method used.

43  
44  
45  
46  
47  
48  
49  
50  
51  
52 130  
53  
54

55 131 To synthesise the data and develop our taxonomy we used systematic and rigorous methods derived  
56 132 from qualitative research. We began with a deductive analysis, which aimed to categorise the

1  
2  
3 133 procedures in a way that is intuitively appealing, accessible, and clinically relevant by sorting them  
4  
5 134 into five previously-identified contextual domains of healthcare: patients' characteristics/beliefs,  
6  
7 135 practitioners' characteristics/beliefs, practitioner-patient relationship, superficial treatment  
8  
9 136 characteristics, and the healthcare environment<sup>31</sup>. Two authors (BC, FB) performed the initial  
10  
11 137 categorisation which was then reviewed in detail by three other authors (GL, HE, AG). We then  
12  
13 138 engaged in a constant comparative analysis, a technique that originates in grounded theory<sup>32</sup>. The  
14  
15 139 aim of this part of the analysis was to consolidate the list of procedures and ensure that we only  
16  
17 140 retained those that were distinct from each other. Procedures and examples of their use were all  
18  
19 141 systematically compared to each other; similar procedures were then merged and all procedures  
20  
21 142 were classified into one of the five domains. Two authors (BC, FB) led this work and presented initial  
22  
23 143 findings to the rest of the team for discussion. All authors discussed and agreed on which  
24  
25 144 procedures to merge, which to retain, and how to classify them. During this process, the definitions  
26  
27 145 of the five domains were iteratively modified in order to reduce ambiguity over which procedures  
28  
29 146 should be classified into which domain. This resulted in a more parsimonious list of 29 procedures  
30  
31 147 classified by domain. All authors discussed and agreed on the final classification of these procedures.  
32  
33 148 These 29 procedures were then critically examined to ensure they were theoretically plausible  
34  
35 149 means of producing placebo effects. We focused on three core psychological mechanisms<sup>25 33-36</sup>:  
36  
37 150 response expectancy<sup>37</sup>; conditioning and social learning<sup>7</sup>; and affect, including motivation and  
38  
39 151 anxiety-reduction<sup>24 38</sup>. However, we acknowledge that these mechanisms are difficult to tease apart  
40  
41 152<sup>39</sup> and that alternative mechanisms have been proposed<sup>6</sup> and so we erred on the side of inclusivity.  
42  
43 153 Neurobiological mechanisms of placebo analgesia have been described<sup>23 40</sup> but a detailed  
44  
45 154 consideration of how these might apply to the procedures in the taxonomy would be highly  
46  
47 155 speculative and was beyond the scope of this project (for discussion of clinical applications of the  
48  
49 156 neuroscience of placebo effects see<sup>41</sup>). Four authors (FB, BC, AG, GL) reviewed all procedures and  
50  
51 157 considered the extent to which each procedure could plausibly produce placebo effects via one or  
52  
53 158 more of the three core psychological mechanisms. Initial findings were shared with the remaining  
54  
55  
56  
57  
58  
59  
60

1  
2  
3 159 authors and consensus was reached through discussion. Four procedures deemed very unlikely to  
4  
5 160 produce placebo effects (Conveying a Neutral Therapeutic Message; Randomisation; Blinding;  
6  
7 161 Deception) were excluded, leaving 25 procedures that might plausibly contribute to placebo effects.  
8  
9 162 The multidisciplinary team of authors (including for example GPs, clinical and health psychologists,  
10  
11 163 and complementary medicine specialists) then generated possible clinical applications of each of  
12  
13 164 these 25 procedures.  
14  
15  
16  
17 165

### 166 **Validating the Taxonomy**

167 To ensure our taxonomy was comprehensive we surveyed leading placebo researchers (authors of  
168 major publications on placebo effects, attendees at an international symposium on placebo effects,  
169 and GPs with an interest in placebo effects). These researchers were identified from the systematic  
170 reviews and their references used to develop the taxonomy; the list of attendees at Beyond The  
171 Placebo: Biomedical Clinical and Philosophical Aspects of the Placebo Effect, held in Ascona  
172 Switzerland, August 2012; and GPs within the National Institute for Health Research School for  
173 Primary Care Research. Ethical approval for the survey was obtained from the host institution  
174 (reference: 4741). Completed electronic surveys including informed consent were received from 33  
175 researchers (52% response rate) experienced in placebo research (M=12 years' experience, SD=9.8).  
176 Respondents were shown our draft taxonomy and asked whether, for each domain, they knew of  
177 any other procedures that could elicit placebo responses. The proportion answering yes ranged  
178 from 22% (Healthcare Setting domain) to 50% (Superficial Treatment Characteristics domain).  
179 Respondents suggested 85 additions which were screened against existing procedures and for  
180 theoretical plausibility: 80 of the suggested additions were extra details or suggested clinical  
181 applications of existing procedures; five were new and distinct plausible procedures that were added  
182 to the taxonomy, giving a final total of 30 procedures.

1  
2  
3 183 Because of our orientation to clinical applications, we have chosen to use clinically-oriented  
4  
5 184 terminology throughout the taxonomy. However, it is important to note that when used in relation  
6  
7 185 to procedures identified from the literature these terms also relate to the experimental equivalent,  
8  
9 186 such that “patient” also refers to subject/participant, “practitioner” also refers to experimenter, and  
10  
11 187 “intervention” also refers to experimental condition.  
12  
13

### 14 188 **Analysis**

15  
16  
17 189 The use of each of the 30 procedures in the taxonomy was assessed across all 169 studies in the  
18  
19 190 review. Two authors independently rated the presence of each procedure in each study (Kappa =  
20  
21 191 0.93, discrepancies were resolved through discussion).  
22  
23  
24 192

### 25 26 27 193 **Results**

28  
29 194 The taxonomy defines 30 procedures that may contribute to placebo effects observed in clinical and  
30  
31 195 experimental research, and classifies them into 5 domains. Table 1 presents the main taxonomy,  
32  
33 196 listing and defining all 30 procedures within 5 domains. Table 2 suggests clinical applications of each  
34  
35 197 procedure. Table 3 shows the frequency of use of each procedure in clinical and experimental  
36  
37 198 studies, and is intended as both an approximate guide to whether the procedures derived primarily  
38  
39 199 from one or other literature and as a means to highlight those procedures that are very common  
40  
41  
42 200 and very rare in the literature. Below we describe the procedures within each domain in turn.  
43  
44  
45  
46  
47  
48  
49  
50  
51  
52  
53  
54  
55  
56  
57  
58  
59  
60

201 Table 1. Taxonomy of Procedures Which Could Plausibly Elicit Placebo Effects in Non-Malignant Pain

| Procedure Derived from Literature                                             | Definition and Use in Research Studies                                                                                                                                                                                                                           |
|-------------------------------------------------------------------------------|------------------------------------------------------------------------------------------------------------------------------------------------------------------------------------------------------------------------------------------------------------------|
| <b>The Patient's Beliefs and Characteristics</b>                              |                                                                                                                                                                                                                                                                  |
| 1. Select Patients Based on Treatment History.                                | Screen and select patients (or subgroups) against inclusion criteria related to issues such as medical/treatment history, e.g. naive to intervention being tested (not just contraindications).                                                                  |
| 2. Create Positive Expectancy.                                                | Deliberately and explicitly suggest to patients that the intervention will be effective for them (not as part of informed consent process).                                                                                                                      |
| 3. Reduce Negative Expectancy. <sup>a</sup>                                   | The potentially negative or harmful procedures and characteristics of the treatment are deliberately minimised in information for patients.                                                                                                                      |
| 4. Convey a Positive Therapeutic Message through Informed Consent Procedures. | Convey (verbally or in writing) a positive therapeutic message through the content of informed consent. The message might be explicit (e.g. "this intervention is usually effective in most people") or implicit (e.g. "this treatment is an antihypertensive"). |
| 5. Harness Socio-cultural Context. <sup>a</sup>                               | Tailor the intervention according to the patient's social and cultural context and history.                                                                                                                                                                      |
| <b>The Practitioner's Beliefs and Characteristics</b>                         |                                                                                                                                                                                                                                                                  |
| 6. Practitioner Expectancy.                                                   | The person delivering the treatment expects it to be effective for the patient.                                                                                                                                                                                  |
| 7. Practitioner's Personal Characteristics.                                   | The practitioner's personal and/or professional characteristics (e.g. status) are modified (through selecting practitioners with different characteristics) and/or emphasised to patients.                                                                       |
| <b>The Healthcare Setting</b>                                                 |                                                                                                                                                                                                                                                                  |
| 8. Active Recruitment.                                                        | Actively seek out and recruit patients (e.g. advertising for specific types of patients, writing personally to individual eligible patients identified through medical records).                                                                                 |
| 9. Active Retention.                                                          | Make patients feel valued by attempting to keep them in a study (e.g. contact patients if they miss an appointment, incentivise attendance through monetary or non-monetary gifts).                                                                              |
| 10. Follow-up.                                                                | Assess patients after the intervention/experiment to assess long-term maintenance or changes in effects over at least 6 months.                                                                                                                                  |
| 11. Follow a Standardised Protocol.                                           | The intervention is delivered according to a set, scientifically-derived, protocol, lending credibility to the intervention (and is therefore not individualised for each patient).                                                                              |
| 12. Ethical Oversight.                                                        | Study practices and procedures are explicitly regulated and monitored by an institutional ethics committee, lending credibility to the intervention.                                                                                                             |
| 13. Participating in Research.                                                | Patients know that they are part of research and contributing to the furthering of human knowledge and/or improvement of healthcare for future patients.                                                                                                         |
| 14. Symptom Monitoring.                                                       | Monitor patients' symptoms using self-report measures, practitioner assessment, or objective measures                                                                                                                                                            |

|                                                 |                                                                                                                                                                                                                       |
|-------------------------------------------------|-----------------------------------------------------------------------------------------------------------------------------------------------------------------------------------------------------------------------|
| 15. Enhanced Environment. <sup>a</sup>          | repeated over time at least twice; patients are aware of the resulting measurements.<br>The physical and interpersonal environment where the intervention is delivered is deliberately enhanced.                      |
| <b>Treatment Characteristics</b>                |                                                                                                                                                                                                                       |
| 16. Sham Intervention – Medication.             | An inert substance is administered which is manufactured to appear identical to an active medication (e.g. sugar pill, saline IV, topical agent).                                                                     |
| 17. Sham Interventions – Physical.              | A sham physical intervention is administered which is designed to appear identical to the genuine intervention (e.g. de-activated TENS, non-penetrative acupuncture needles at non-acupuncture points).               |
| 18. Sham Interventions – Attention Only.        | Patients receive study-specific attention in terms of numbers of visits and time spent with study staff but no additional intervention.                                                                               |
| 19. Ineffective substances. <sup>a</sup>        | Products unlikely to be effective or not indicated are administered (e.g. vitamins in the absence of vitamin deficiency).                                                                                             |
| 20. Use Salient Side-Effects.                   | Potential side-effects are highlighted such that the patient can interpret them as evidence of a potent intervention.                                                                                                 |
| 21. Matched Treatments.                         | To secure blinding, placebo/sham treatments are matched to 'real' treatments (e.g. on mode of administration, dosage, frequency of administration, visual appearance, taste, smell, individual titration procedures). |
| 22. Maximised Treatment Procedures.             | The procedures and characteristics of the treatment are exaggerated, e.g. through high dose, use of colour, high frequency, large pill size, lengthy duration of intervention, ritualistic administration.            |
| 23. Conditioning.                               | A desired response (e.g. pain relief) is paired with an intervention stimulus (e.g. placebo cream) so that the patient associates the response with the stimulus.                                                     |
| <b>The Patient-Practitioner Interaction</b>     |                                                                                                                                                                                                                       |
| 24. The Process of Informed Consent.            | The patient's formal written and/or verbal informed consent is discussed and obtained.                                                                                                                                |
| 25. Detailed History.                           | A detailed personal and/or medical and/or psychosocial history is obtained from the patient.                                                                                                                          |
| 26. Diagnosis/tests.                            | Additional tests, examinations, or confirmatory diagnostic procedures are undertaken to establish eligibility for the study.                                                                                          |
| 27. Care.                                       | The practitioner deliberately engages the patient with warmth, compassion and empathy.                                                                                                                                |
| 28. Patient-Centred Communication. <sup>a</sup> | The practitioner adopts a style of consultation that they consider to be appropriate for a particular patient.                                                                                                        |
| 29. Extra Attention.                            | The patient receives extra attention from being in the study, for example is seen more frequently or for longer than usual.                                                                                           |
| 30. Continuity of Care.                         | Efforts are made for the same practitioner to see the same patient at each contact.                                                                                                                                   |

202 <sup>a</sup> procedures added following survey of researchers.



203 Table 2. Suggested Potential Clinical Applications of Procedures to Elicit Placebo Effects in Non-  
 204 Malignant Pain, Subject to Further Research

205

| Procedure                                                                     | Suggested Clinical Applications                                                                                                                                                                                                                                                            |
|-------------------------------------------------------------------------------|--------------------------------------------------------------------------------------------------------------------------------------------------------------------------------------------------------------------------------------------------------------------------------------------|
| <b>The Patient's Beliefs and Characteristics</b>                              |                                                                                                                                                                                                                                                                                            |
| 1. Select Patients Based on Treatment History.                                | Stop prescribing interventions of a type that a patient has previously not responded to (e.g. tablets); instead, prescribe a different, new, type of treatment (e.g. psychological therapy).                                                                                               |
| 2. Create Positive Expectancy.                                                | Tell the patient the intervention is likely to be effective.<br>Elicit patients' treatment and illness beliefs and expectations, and dispel any misconceptions.<br>Empower patients to self-care.                                                                                          |
| 3. Reduce Negative Expectancy.                                                | Limit emphasis on major potential side effects, and describe how uncommon they are.<br>Hide cessation of analgesia administration (e.g. as in Benedetti <sup>42</sup> ), after obtaining advanced consent and ensuring patients are aware they can request additional analgesia if needed. |
| 4. Convey a Positive Therapeutic Message through Informed Consent Procedures. | Provide written and/or verbal information that conveys a positive therapeutic message about treatment.<br>Provide clear rationale for treatment.<br>Provide patient testimonials and supporting literature/media.                                                                          |
| 5. Harness Socio-cultural Context.                                            | Elicit patients' culturally embedded treatment and illness beliefs, preferences and expectations, dispelling any potentially harmful misconceptions.<br>Involve significant others in care.                                                                                                |
| <b>The Practitioner's Beliefs and Characteristics</b>                         |                                                                                                                                                                                                                                                                                            |
| 6. Practitioner Expectancy.                                                   | Only prescribe a treatment to patients when the practitioner expects it will be effective; communicate that expectation to patients.                                                                                                                                                       |
| 7. Practitioner's Personal Characteristics.                                   | Honour patient preferences for particular practitioners.<br>Use indicators of expertise/high status in offices, in correspondence, and when referring to other practitioners.<br>Ensure the patient is seen by a practitioner whose views/values are congruent with the patient's.         |
| <b>The Healthcare Setting</b>                                                 |                                                                                                                                                                                                                                                                                            |
| 8. Active Recruitment.                                                        | Actively seek out patients and invite them to attend clinic regarding a particular intervention (as opposed to waiting for patients to present).                                                                                                                                           |
| 9. Active Retention.                                                          | Personally contact patients if they miss an appointment.<br>Use incentives to encourage patients to keep appointments.                                                                                                                                                                     |
| 10. Follow-up.                                                                | Routinely invite patients to book a follow up appointment after an intervention has finished and prior to repeat prescription.<br>Encourage the patient to take responsibility for and self-manage their condition following an intervention.                                              |
| 11. Follow a Standardised Protocol.                                           | Use patient-friendly treatment protocols and share with patients where they fit in that protocol.                                                                                                                                                                                          |

|                                |                                                                                                                                                                                                                             |
|--------------------------------|-----------------------------------------------------------------------------------------------------------------------------------------------------------------------------------------------------------------------------|
| 12. Ethical Oversight.         | Ensure that patients understand that their treatment protocol is sanctioned by a higher authority e.g. NICE.                                                                                                                |
| 13. Participating in Research. | Inform patients that all outcomes and practitioner performance is audited and can contribute to improved knowledge and treatment for future patients.                                                                       |
| 14. Symptom Monitoring.        | Ask patients to monitor their symptoms regularly, for example using email, phone apps, web-based systems, paper forms.<br>Assess treatment outcome.<br>Give patients feedback on symptom improvements following monitoring. |
| 15. Enhanced Environment.      | Ensure that the environment is professional, pleasant and peaceful.<br>Employ friendly and helpful support staff.                                                                                                           |

### Treatment Characteristics

|                                          |                                                                                                                                                                                                                                                                                                                            |
|------------------------------------------|----------------------------------------------------------------------------------------------------------------------------------------------------------------------------------------------------------------------------------------------------------------------------------------------------------------------------|
| 16. Sham Intervention – Medication.      | Openly prescribe sham medication.<br>With advanced prior consent, prescribe sham medication.                                                                                                                                                                                                                               |
| 17. Sham Interventions – Physical.       | Openly prescribe sham physical treatments.<br>With advanced prior consent, prescribe sham physical treatments.                                                                                                                                                                                                             |
| 18. Sham Interventions – Attention Only. | Increase frequency and duration of consultations.                                                                                                                                                                                                                                                                          |
| 19. Ineffective substances.              | Prescribe substances that are likely not to cause harm but not clearly indicated or substances unlikely to be effective e.g. simple linctus.                                                                                                                                                                               |
| 20. Use Side-Effects.                    | Tell patients about side effects associated with positive clinical outcome.                                                                                                                                                                                                                                                |
| 21. Matched treatments.                  | Design appearance of prescribed substance (e.g. colour, packaging, taste) to match known effective treatments.                                                                                                                                                                                                             |
| 22. Maximised treatment procedures.      | Within safety limits prescribe higher dose/higher frequency/larger pill.<br>Use different colour treatments.<br>Instigate ritualistic procedures patients can perform when taking medicines.<br>Maximise adherence to treatment through education, easy follow up appointments, easy repeat prescription arrangements etc. |
| 23. Conditioning.                        | Prescribe highest tolerated dose first, then titrate downwards.<br>With consent, begin with active intervention, pair with a seemingly identical placebo then substitute for placebo alone.(e.g. as in Sandler <sup>43</sup> )                                                                                             |

### The Patient-Practitioner Interaction

|                                      |                                                                                                                                                                                                                       |
|--------------------------------------|-----------------------------------------------------------------------------------------------------------------------------------------------------------------------------------------------------------------------|
| 24. The Process of Informed Consent. | Actively seek patient consent.<br>Provide treatment options and encourage the patient to choose from these options if they so desire.                                                                                 |
| 25. Detailed History.                | Take a detailed medical and psychosocial history/update.<br>Ensure the patient feels listened to, e.g. through non-verbal communication and/or capturing information.<br>Ask questions about the meaning of symptoms. |
| 26. Diagnosis/tests.                 | Provide a definitive/confident diagnosis.<br>Examine the patient fully.                                                                                                                                               |
| 27. Care.                            | Allow patient adequate time to tell their story and listen to them.<br>Validate the patient's concerns.<br>Use non-verbal techniques to convey empathy, compassion, warmth.<br>Use touch judiciously.                 |

|                                    |                                                                                                                                                                                                                                             |
|------------------------------------|---------------------------------------------------------------------------------------------------------------------------------------------------------------------------------------------------------------------------------------------|
| 28. Patient-Centred Communication. | Individualise consultation style according to a patient's preference e.g. collaborative vs authoritative.<br>Engage in collaborative decision-making with the patient.<br>Develop shared treatment goals that you and the patient agree on. |
| 29. Extra Attention.               | Give extra attention to or show more interest in a patient by seeing them more frequently, having longer consultations or visiting at home.<br>Do not rush the patient.                                                                     |
| 30. Continuity of Care.            | Ensure patient is cared for by the same practitioner.<br>Read records before consultation.                                                                                                                                                  |

206 Note. Suggestions for clinical applications pending research into effectiveness and ethical  
207 acceptability in clinical settings.

For peer review only

208 Table 3. Use of Procedures in Placebo Groups of Clinical and Experimental Studies

| Procedure                                                                    | % of studies that used each procedure: |                  |
|------------------------------------------------------------------------------|----------------------------------------|------------------|
|                                                                              | Experimental (n=58)                    | Clinical (n=111) |
| <b>The Patient's Beliefs and Characteristics</b>                             |                                        |                  |
| 1. Select Intervention Based on Patient's Treatment History.                 | 55%                                    | 75%              |
| 2. Create Positive Expectancy.                                               | 76%                                    | 5%               |
| 3. Reduce Negative Expectancy.                                               | 3%                                     | 0%               |
| 4. Convey a Positive Therapeutic Message through Informed Consent Procedures | 43%                                    | 1%               |
| 5. Harness Socio-cultural Context.                                           | 0%                                     | 0%               |
| <b>The Practitioner's Beliefs and Characteristics</b>                        |                                        |                  |
| 6. Practitioner Expectancy.                                                  | 0%                                     | 1%               |
| 7. Practitioner's Personal Characteristics.                                  | 9%                                     | 0%               |
| <b>The Healthcare Setting</b>                                                |                                        |                  |
| 8. Active Recruitment.                                                       | 14%                                    | 16%              |
| 9. Active Retention.                                                         | 3%                                     | 2%               |
| 10. Follow-up.                                                               | 2%                                     | 16%              |
| 11. Follow a Standardised Protocol.                                          | 85%                                    | 63%              |
| 12. Ethical Oversight.                                                       | 78%                                    | 69%              |
| 13. Participating in Research.                                               | 86%                                    | 84%              |
| 14. Symptom Monitoring.                                                      | 95%                                    | 89%              |
| 15. Enhanced Environment.                                                    | 5%                                     | 0%               |
| <b>Treatment Characteristics</b>                                             |                                        |                  |
| 16. Sham Intervention – Medication.                                          | 71%                                    | 55%              |
| 17. Sham Interventions – Physical.                                           | 33%                                    | 41%              |
| 18. Sham Interventions – Attention Only.                                     | 2%                                     | 5%               |
| 19. Ineffective substances.                                                  | 0%                                     | 1%               |
| 20. Use Side-Effects.                                                        | 0%                                     | 1%               |
| 21. Matched treatments.                                                      | 40%                                    | 82%              |
| 22. Maximised treatment procedures.                                          | 22%                                    | 3%               |
| 23. Conditioning.                                                            | 41%                                    | 0%               |
| <b>The Patient-Practitioner Interaction</b>                                  |                                        |                  |
| 24. The Process of Informed Consent.                                         | 88%                                    | 77%              |
| 25. Detailed History.                                                        | 19%                                    | 33%              |
| 26. Diagnosis/tests.                                                         | 36%                                    | 41%              |
| 27. Care.                                                                    | 0%                                     | 1%               |
| 28. Patient-Centred Communication.                                           | 0%                                     | 0%               |
| 29. Extra Attention.                                                         | 2%                                     | 63%              |
| 30. Continuity of Care.                                                      | 7%                                     | 14%              |

209

1  
2  
3 **210 The Patient's Characteristics and Beliefs**  
4

5  
6 211 The taxonomy specifies five procedures that act directly on the patient's characteristics and/or  
7  
8 212 beliefs in ways that might contribute to placebo effects. Procedure 1 involves selecting patients who  
9  
10 213 are most likely to benefit from an intervention based on their history of similar treatments (where  
11  
12 214 similarity is construed broadly at multiple levels, including appearance, modality, style, and  
13  
14 215 pharmacology). For example, one might select those patients who have not experienced  
15  
16 216 disappointing results from a similar intervention in the past (as the latter group might have learned  
17  
18 217 to expect the intervention to fail). This procedure was commonly used by clinical trials and (to a  
19  
20 218 lesser degree) experimental studies.  
21

22  
23  
24 219

25  
26  
27 220 Procedures 2 (create positive expectancy), 3 (reduce negative expectancy), and 4 (convey a positive  
28  
29 221 therapeutic message), all involve communicating with patients to encourage them to expect  
30  
31 222 beneficial effects of treatment or not to expect side-effects. The majority of experimental studies in  
32  
33 223 our review explicitly encouraged patients to expect treatment benefits, while very few clinical  
34  
35 224 studies explicitly targeted patients' expectations and hardly any studies attempted to minimise  
36  
37 225 patients' expectations of side-effects. Procedure 5 involves tailoring the intervention to the  
38  
39 226 patient's socio-cultural context. This approach emerged from the expert feedback and while it  
40  
41 227 seems plausible and ethical to translate into clinical practice, it was not used by any of the reviewed  
42  
43 228 studies.  
44  
45

46  
47 229

48  
49  
50 230 The procedures in the patients' beliefs and characteristics domain are thought to contribute to  
51  
52 231 placebo effects primarily through altering patients' response expectancy. Selecting patients based  
53  
54 232 on treatment history and tailoring to socio-cultural context are also predicated on learning  
55  
56 233 mechanisms, i.e., learned associations between treatment outcome and treatment properties.  
57  
58  
59  
60

1  
2  
3 234 There is some evidence that clinicians can give verbal suggestions to alter patients' expectations in  
4  
5 235 practice and that this reduces patients' pain, particularly acute procedural pain<sup>44</sup>. As part of work  
6  
7 236 to implement these procedures more widely in practice it would be important to investigate how to  
8  
9 237 secure ethically valid consent for treatment. For example, clinicians might want to encourage  
10  
11 238 realistically positive patient expectations while providing information about possible harms without  
12  
13 239 inducing the negative expectations that could trigger nocebo effects<sup>45,46</sup>.

14  
15  
16  
17 240

### 18 19 241 **The Practitioner's Characteristics and Beliefs**

20  
21 242 The two procedures in this domain are about using or modifying health care practitioners'  
22  
23 243 characteristics and/or beliefs. Procedure 6 requires a practitioner to expect a treatment to benefit  
24  
25 244 the patient. This might contribute to observed placebo effects in patients by influencing a  
26  
27 245 practitioner's communication about the treatment and hence a patient's response expectations  
28  
29 246 and/or affective response to the consultation. Only 1% of clinical studies and no experimental  
30  
31 247 studies reported modifying practitioners' expectations. This procedure has received little attention  
32  
33 248 in the placebo literature but clinical research in musculoskeletal settings suggests practitioners'  
34  
35 249 outcome expectations can predict patients' pain outcomes<sup>47</sup>. One way to implement this procedure  
36  
37 250 in practice would be for practitioners to communicate explicitly that they believe a treatment is  
38  
39 251 effective, an approach which clearly overlaps with communication interventions designed to help  
40  
41 252 doctors encourage patients to have positive expectations. Implementing Procedure 6 also depends  
42  
43 253 on practitioners having relevant high quality evidence readily available and accessible and  
44  
45 254 understanding this evidence as it applies to the patient.

46  
47  
48  
49  
50 255

51  
52  
53 256 A small proportion of studies (9% of experimental studies and no clinical studies) emphasised a  
54  
55 257 practitioner's status or other characteristics (Procedure 7). For some patients a high status  
56  
57 258 practitioner might elicit more confidence in the treatment (and thus higher expectations) and/or a  
58  
59  
60

1  
2  
3 259 more positive affective response to the consultation<sup>48</sup>. Some aspects of this procedure are already  
4  
5 260 part of clinical practice, for example the routine display of medical certificates in doctors' offices;  
6  
7 261 others are inherent in the tools of the doctor, such as the symbolic properties of the stethoscope<sup>49</sup>.  
8  
9 262 However, there is likely to be scope for testing their effects and augmenting their use if appropriate.  
10  
11

12 263

### 14 264 **The Healthcare Setting**

15  
16 265 Procedures 8 and 9 relate to the efforts made in studies to actively recruit and retain patients  
17  
18 266 respectively. Clinical and experimental studies both reportedly used these procedures sparingly (<20%  
19  
20 267 for active recruitment and <5% for active retention). Such efforts may make patients feel valued and  
21  
22 268 could be implemented in practice through the use of personalised communications from  
23  
24 269 practitioners to encourage attendance at appointments.  
25  
26  
27

28 270

29  
30  
31 271 Three of the eight procedures in this domain were used by over half of clinical and experimental  
32  
33 272 studies and relate to basic structural features of research: following a protocol, ethical oversight, and  
34  
35 273 participating in research (procedures 11 to 13). They are thought to impact patients' expectations,  
36  
37 274 by emphasising the legitimacy of the intervention that is being provided and the importance of the  
38  
39 275 patient's contribution to a bigger project, i.e. generating knowledge. Translating these procedures  
40  
41 276 into practice could involve, for example, clinicians explicitly talking with patients about official  
42  
43 277 guidance and treatment protocols that they are following.  
44  
45  
46

47 278

48  
49  
50 279 Symptom monitoring (procedure 14) was commonly used in both clinical and experimental studies.  
51  
52 280 This could be implemented in practice for example through repeatedly using patient reported  
53  
54 281 outcome measures (see<sup>50</sup>) and might contribute to placebo effects through learning mechanisms  
55  
56 282 (e.g. regular symptom monitoring acts as feedback to motivate health behaviours and/or modify  
57  
58  
59  
60

1  
2  
3 283 patients' goals). Alternatively, the mere act of asking a patient to monitor their symptoms could  
4  
5 284 convey an expectation of treatment benefit, altering the meaning of a clinical interaction for the  
6  
7 285 patient. Traditionally such effects of the act of measurement are dismissed as Hawthorne effects  
8  
9 286 but they may also be encompassed in broader definitions of placebo effects as meaning effects<sup>51</sup>  
10  
11 287 and could thus enhance effects in clinical practice despite being considered a nuisance in clinical  
12  
13 288 research.

14  
15  
16  
17 289

18  
19  
20 290 Very few placebo studies (5% of experimental and no clinical studies) reported enhancing the  
21  
22 291 physical or interpersonal environment (procedure 15). There is a separate and distinct literature on  
23  
24 292 environment modifications in health settings that might be usefully integrated with the placebo  
25  
26 293 literature when developing clinical applications in this area and modelling mechanisms of action<sup>52,53</sup>.

27  
28  
29 294

### 30 295 **Treatment Characteristics**

31  
32 296 Eight procedures in the taxonomy involve modifying the characteristics of a treatment. Three  
33  
34 297 involve prescribing sham interventions (sham medication – procedure 16, sham physical  
35  
36 298 interventions – procedure 17, and extra attention – procedure 18) while a fourth involves  
37  
38 299 prescribing a substance unlikely to be effective for the symptom in question (procedure 19). These  
39  
40 300 four procedures represent variations in control conditions used in research and were frequently  
41  
42 301 used by both clinical and experimental studies (with the exception of extra attention which was only  
43  
44 302 used by 2-5% of studies). Such controls are thought to operate primarily via expectations, while  
45  
46 303 affective pathways may also be important when extra attention from trial personnel/medical staff is  
47  
48 304 involved. Of all the procedures in the taxonomy these four that represent control conditions come  
49  
50 305 closest to the traditional notion of how placebos could be applied in practice. Given ethical concerns  
51  
52 306 around deceptive prescribing we suggest that translational research might continue to focus on  
53  
54 307 openly prescribing sham interventions including placebo pills (as in<sup>14,15</sup>). Other options should not



1  
2  
3 308 be dismissed entirely though: advanced consent and even waiving consent are acceptable to some  
4  
5 309 patients and so it is vital for translational research to continue exploring patients', practitioners', and  
6  
7 310 other stakeholders' views on the acceptability and ethics of diverse ways of prescribing placebos<sup>54-57</sup>.  
8  
9

10 311

11  
12  
13 312 Three procedures in this domain modify the superficial (non-pharmacological or non-defining)  
14  
15 313 characteristics of treatments. Procedure 20 is to highlight treatment side-effects to patients in order  
16  
17 314 to encourage patients to see the treatment as potent; this procedure was very rare, used by only 1%  
18  
19 315 of clinical studies. Procedure 21 was much more commonly used and involves matching the  
20  
21 316 appearance of real and control treatments (used by 40% of experimental and 82% of clinical studies),  
22  
23 317 in order to maintain patient blinding. This could be translated into clinical practice by designing the  
24  
25 318 appearance of interventions to match patients' beliefs about what effective interventions look like.  
26  
27  
28 319 Procedure 22 involves maximising or exaggerating the superficial characteristics of treatment in  
29  
30 320 order to generate larger placebo effects for example by using colour, large pill size, or ritualistic  
31  
32 321 administration of medicines, manipulations which could alter the meaning of a treatment for a  
33  
34 322 patient and/or enhance their expectations. 22% of experimental studies reported using this  
35  
36 323 procedure and one way to translate it into practice would be to create (and test) ritualistic  
37  
38 324 procedures for patients to engage in when taking medicines.  
39  
40  
41

42 325

43  
44  
45 326 The final procedure in this domain – procedure 23, conditioning to generate placebo effects - was  
46  
47 327 used commonly and exclusively by experimental studies (41%). Conditioning protocols generate  
48  
49 328 placebo effects through learning mechanisms and perhaps could be implemented in practice to  
50  
51 329 reduce pharmaceutical dosages, as was achieved in a pilot study in children with attention deficit  
52  
53 330 disorder<sup>43</sup>.  
54

55  
56  
57 331  
58  
59  
60

1  
2  
3 332 **The Patient-Practitioner Interaction**

4  
5 333 The *Patient-Practitioner Interaction* domain incorporates seven procedures related to the  
6  
7 334 interpersonal relationship or interactions between a patient and their health care practitioner.  
8  
9 335 These procedures are thought to operate primarily through affective mechanisms such as reduced  
10  
11 336 anxiety after telling one's story and being listened to with empathy and acknowledged, although  
12  
13 337 more cognitive pathways via expectations are also plausible<sup>58</sup>. Three procedures are about specific  
14  
15 338 processes that can occur during consultations – obtaining informed consent (procedure 24), taking a  
16  
17 339 detailed history (procedure 25), and performing additional diagnoses or tests (procedure 26).  
18  
19 340 Arguably these procedures indicate to the patient that the practitioner respects them, is interested  
20  
21 341 in their perspective, and is thorough in their diagnosis. They occur in both clinical and experimental  
22  
23 342 research settings and could be relatively directly translated into practice or optimised if already used.  
24  
25  
26  
27  
28  
29

30  
31  
32  
33  
34  
35  
36  
37  
38  
39  
40  
41  
42  
43  
44  
45  
46  
47  
48  
49  
50  
51  
52  
53  
54  
55  
56  
57  
58  
59  
60

343  
344 Two procedures are about the way in which the practitioner engages with the patient:  
345 communicating care (procedure 27), and patient-centred communication (procedure 28). These  
346 procedures were surprisingly very rarely described in the studies included in our review, although  
347 recently the nocebo effects of *not* validating a patient's experiences have been shown to be  
348 particularly potent<sup>59</sup>. There is of course a distinct and large literature on doctor-patient  
349 communication and fruitful dialogue is beginning to bridge these fields<sup>60</sup>.

350

351 The final two procedures in this domain refer to more structural aspects of consultations: extra  
352 attention (procedure 29, i.e. longer or more frequent appointments) and continuity of care  
353 (procedure 30). 63% of clinical studies used extra attention while a small proportion of clinical (14%)  
354 and experimental (7%) studies reported providing continuity of care. Directly implementing these  
355 procedures in practice might be challenging given ever increasing constraints on healthcare  
356 resources and drives to reduce cost.

1  
2  
3 357  
4  
5

6 358

## Discussion

7  
8 359 The taxonomy names and describes 30 procedures that may contribute to placebo effects in  
9  
10 360 experimental and clinical studies and classifies them into five domains. It includes 60 theoretically  
11  
12 361 plausible clinical applications, subject to further research on their effectiveness and ethical  
13  
14 362 acceptability in practice. Some of the clinical applications derived from the placebo literature have  
15  
16 363 already been investigated in their own right under other auspices, highlighting the need for the  
17  
18 364 burgeoning translational science of placebo effects to be broad-ranging and interdisciplinary.

19  
20  
21  
22 365

23  
24  
25 366 We have used rigorous systematic review and qualitative analytic methods complemented by a  
26  
27 367 survey to develop the taxonomy. Investigators often combine multiple techniques in any one  
28  
29 368 'placebo' (e.g. Create Positive Expectancy + Detailed History + Symptom Monitoring) making it  
30  
31 369 beyond the scope of this project to unpack the effectiveness of individual techniques. Procedures  
32  
33 370 did not always fit neatly into single domains. For example, "Screen for Treatment History" was used  
34  
35 371 to select patients for studies of specific treatments (and was thus placed in the Patient's Beliefs and  
36  
37 372 Characteristics domain), but its clinical application involves selecting a treatment for a specific  
38  
39 373 patient and so could be considered a Treatment Characteristic. Conceptually we would expect  
40  
41 374 interactions between these domains; for example, some procedures categorised in other domains  
42  
43 375 probably operate through causal pathways involving patients' beliefs as proximal determinants of  
44  
45 376 placebo effects<sup>61</sup>. We feel the benefits of having a hierarchical structure (modifiable as the  
46  
47 377 taxonomy is refined with use) outweigh the difficulties inherent in classification. We could have  
48  
49 378 used many published reviews of placebo studies in non-malignant pain to identify original studies to  
50  
51 379 review. Selecting seven such reviews means not using others, thus we might have missed original  
52  
53 380 studies that would have suggested additional procedures. Surveying leading researchers and  
54  
55 381 incorporating their suggestions somewhat mitigates this limitation. Our sample of researchers was

1  
2  
3 382 intended to be purposive, in that we wanted to obtain the views of leading researchers in the field.  
4  
5 383 By using multiple means of identifying such individuals internationally we feel we have achieved this.  
6  
7 384 The reviews that we selected as the source of our papers and the papers themselves are now  
8  
9 385 somewhat old examples of the literature; and our choice to exclude papers published before 1983  
10  
11 386 was arguably somewhat arbitrary. Future work should review very recent papers and iteratively  
12  
13 387 improve the taxonomy accordingly.  
14  
15  
16  
17 388

18  
19  
20 389 This review extends previous work by Di Blasi et al.<sup>31</sup>, building on their five domains to  
21  
22 390 systematically develop a detailed taxonomy. We provide a new overarching framework that avoids  
23  
24 391 the controversial and limited distinction between pure and impure placebos<sup>62 63</sup> and integrates ideas  
25  
26 392 from the rich clinical and experimental literatures on placebo effects in non-malignant pain. Many  
27  
28 393 of the components we have identified are likely to be important in other placebo-responsive  
29  
30 394 conditions including depression<sup>64</sup>, irritable bowel syndrome<sup>65 66</sup>, and insomnia<sup>67</sup>. This taxonomy  
31  
32 395 can guide two important and related applied research agendas: 1) to understand the components of  
33  
34 396 placebo effects in clinical settings<sup>48 68-71</sup> and 2) to ethically harness evidence-based placebo effects  
35  
36 397 to benefit patients<sup>14 15 72</sup>. We hope future studies might draw on the taxonomy to fully describe  
37  
38 398 their methods and develop new applications, thus facilitating future systematic reviews and the  
39  
40 399 development of a systematic and theory driven cumulative evidence-base in this complex field.  
41  
42  
43  
44 400

45  
46  
47 401 The taxonomy identifies and classifies procedures that may contribute to placebo effects in clinical  
48  
49 402 trials and experiments, providing an overarching framework for individual components. However,  
50  
51 403 we do not suggest that every technique in this taxonomy will produce a placebo effect in every  
52  
53 404 patient and we do not know from this project which techniques are more effective or how they  
54  
55 405 might be combined to form ethically acceptable and effective complex interventions. This taxonomy  
56  
57  
58  
59  
60

1  
2  
3 406 provides the first attempt at a necessary conceptual tool to facilitate future research on these  
4  
5 407 questions. For example, systematic reviews could use the taxonomy to code procedures in original  
6  
7 408 studies, using this information in meta-regression analysis to examine the contribution of different  
8  
9 409 procedures to placebo effects<sup>73</sup>. New clinical trials and experiments could extend existing work by  
10  
11 410 systematically examining and comparing the effects and ethical acceptability of different procedures  
12  
13 411 in the taxonomy, building a cumulative evidence-base that has real pragmatic applicability to clinical  
14  
15 412 practice. Some of the suggested clinical applications have been investigated more extensively in  
16  
17 413 other literatures, in particular doctor-patient communication and the healthcare environment. This  
18  
19 414 emphasises the need for a multi-disciplinary approach to the translation of placebo research into  
20  
21 415 practice. One fruitful way forward would be to draw on placebo theories to develop and test more  
22  
23 416 mechanistic models of complex interventions intended to alter the context of healthcare encounters.  
24  
25  
26  
27  
28  
29

417

30 418 Placebo recipients in clinical trials and experiments are exposed to a large number and variety of  
31  
32 419 procedures, many of which might contribute to placebo effects. Researchers seeking to develop a  
33  
34 420 translational science of placebo effects are thus faced with myriad possibilities. We have  
35  
36 421 systematically identified and defined these procedures, classified them into five domains, and  
37  
38 422 suggested possible clinical applications. The resulting taxonomy is presented as a preliminary but  
39  
40 423 detailed and systematic guide for future research, which should in turn further refine the taxonomy.  
41  
42 424 Ultimately we hope to better conceptualise investigations of clinical applications of placebo effects  
43  
44 425 in order to maximise opportunities for patient benefit.  
45  
46  
47  
48  
49  
50  
51  
52  
53  
54  
55  
56  
57  
58  
59  
60

## Funding

426  
427 The project “Creating a Taxonomy to Harness the Placebo effect in UK primary care” was funded by  
428 the National Institute of Health Research (NIHR) School for Primary Care Research (SPCR) (project  
429 number 161). This paper presents independent research funded by the National Institute of Health  
430 Research (NIHR). The views expressed are those of the author(s) and not necessarily those of the  
431 NHS, the NIHR or the Department of Health. Additional funding for BC was provided by Solent NHS  
432 Trust. The funders had no role in design and conduct of the study; collection, management, analysis,  
433 and interpretation of the data; preparation, review, or approval of the manuscript; and decision to  
434 submit the manuscript for publication.

## Acknowledgements

437 We would like to acknowledge the contribution of all of the researchers who shared their views in  
438 the survey, including Przemyslaw Babel PhD, Luana Colloca MD PhD, Professor Michael Doherty,  
439 Vanda Faria PhD, Professor Magne Arve Flaten PhD, Sarah Goldingay PhD, John Hughes PhD,  
440 Professor Dr Robert Juetten, Irving Kirsch PhD, Karin Meissner PD Dr. med. Habil., Daniel E Moerman  
441 PhD, Meike Shedden Mora PhD, Donald D. Price PhD, Professor Dr Dr Harald Walach. We thank  
442 Professor Ted Kaptchuk for comments on an earlier draft of this manuscript.

## Competing Interests

445 All authors have completed the ICMJE uniform disclosure form at  
446 [http://www.icmje.org/coi\\_disclosure.pdf](http://www.icmje.org/coi_disclosure.pdf) and declare: no support from any organisation for the  
447 submitted work; no financial relationships with any organisations that might have an interest in the

1  
2  
3 448 submitted work in the previous three years, no other relationships or activities that could appear to  
4  
5 449 have influenced the submitted work.  
6  
7

### 8 **Exclusive Licence**

9 451 The Corresponding Author has the right to grant on behalf of all authors and does grant on behalf of  
10  
11 452 all authors, a worldwide licence  
12  
13 453 (<http://www.bmj.com/sites/default/files/BMJ%20Author%20Licence%20March%202013.doc>) to the  
14  
15 454 Publishers and its licensees in perpetuity, in all forms, formats and media (whether known now or  
16  
17 455 created in the future), to i) publish, reproduce, distribute, display and store the Contribution, ii)  
18  
19 456 translate the Contribution into other languages, create adaptations, reprints, include within  
20  
21 457 collections and create summaries, extracts and/or, abstracts of the Contribution and convert or  
22  
23 458 allow conversion into any format including without limitation audio, iii) create any other derivative  
24  
25 459 work(s) based in whole or part on the on the Contribution, iv) to exploit all subsidiary rights to  
26  
27 460 exploit all subsidiary rights that currently exist or as may exist in the future in the Contribution, v)  
28  
29 461 the inclusion of electronic links from the Contribution to third party material where-ever it may be  
30  
31 462 located; and, vi) licence any third party to do any or all of the above.  
32  
33  
34  
35

### 36 **Contributorship Statement**

37 463 FB designed and led the study, drafted the manuscript, and is guarantor. FB, GL, AWAG, HE, and PL  
38  
39 464 secured funding for the project. FB designed the study with input and revisions from GL, BC, AWAG,  
40  
41 465 HE, and PL. BC led data collection and analysis with additional data collection and analysis by MH  
42  
43 466 and DS. All authors contributed to data interpretation. FB drafted the manuscript and all authors  
44  
45 467 revised it for important intellectual content. All authors had full access to all of the data in the study  
46  
47 468 and can take responsibility for the integrity of the data and the accuracy of the data analysis.  
48  
49  
50

### 51 **Data Sharing Statement**

52 470 No unpublished data available.  
53  
54  
55  
56 472

## References

1. Zhang W, Robertson J, Jones AC, et al. The placebo effect and its determinants in osteoarthritis: meta-analysis of randomised controlled trials. *Ann Rheum Dis* 2008;**67**(12):1716-23.
2. Hrobjartsson A, Gotzsche PC. Placebo interventions for all clinical conditions. *Cochrane Database of Systematic Reviews* 2010;**1**:Art. No.: CD003974-DOI: 10.1002/14651858.CD003974.pub3.
3. Vase L, Riley JL, Price DD. A comparison of placebo effects in clinical analgesic trials versus studies of placebo analgesia. *Pain* 2002;**99**(3):443-52.
4. Peerdeman KJ, van Laarhoven AIM, Keij SM, et al. Relieving patients' pain with expectation interventions: a meta-analysis. *Pain* 2016;**157**(6):1179-91.
5. Brody H. The placebo response. *J Fam Pract* 2000;**49**:649-54.
6. Moerman DE, Jonas WB. Deconstructing the placebo effect and finding the meaning response. *Ann Intern Med* 2002;**136**(6):471-76.
7. Colloca L, Miller FG. How placebo responses are formed: a learning perspective. *Philosophical Transactions of the Royal Society B: Biological Sciences* 2011;**366**(1572):1859-69.
8. Howick J, Friedemann C, Tsakok M, et al. Are Treatments More Effective than Placebos? A Systematic Review and Meta-Analysis. *PLoS One* 2013;**8**(5):e62599.
9. Doherty M, Dieppe P. The "placebo" response in osteoarthritis and its implications for clinical practice. *Osteoarthritis Cartilage* 2009;**17**(10):1255-62.
10. Lichtenberg P, Heresco-Levy U, Nitzan U. The ethics of the placebo in clinical practice. *J Med Ethics* 2004;**30**:551-54.
11. Colloca L, Miller FG. Harnessing the placebo effect: the need for translational research. *Philosophical Transactions of the Royal Society B: Biological Sciences* 2011;**366**(1572):1922-30.
12. Benedetti F, Pollo A, Lopiano L, et al. Conscious expectation and unconscious conditioning in analgesic, motor, and hormonal placebo/nocebo responses. *The Journal of Neuroscience* 2003;**23**(10):4315-23.
13. Bingel U, Wanigasekera V, Wiech K, et al. The Effect of Treatment Expectation on Drug Efficacy: Imaging the Analgesic Benefit of the Opioid Remifentanyl. *Science Translational Medicine* 2011;**3**(70):70ra14-70ra14.
14. Kaptchuk TJ, Friedlander E, Kelley JM, et al. Placebos without deception: A randomized controlled trial in Irritable Bowel Syndrome. *PLoS One* 2010;**5**(12):e15591.
15. Kelley JM, Kaptchuk TJ, Cusin C, et al. Open-label placebo for major depressive disorder: a pilot randomized-controlled trial. *Psychother Psychosom* 2012;**81**:312-14.
16. Blease C, Colloca L, Kaptchuk TJ. Are open-Label Placebos Ethical? Informed Consent and Ethical Equivocations. *Bioethics* 2016;**30**(6):407-14.
17. Barnhill A, Miller FG. The ethics of placebo treatments in clinical practice: a reply to Glackin. *J Med Ethics* 2015.
18. Enck P, Bingel U, Schedlowski M, et al. The placebo response in medicine: minimize, maximize or personalize? *Nat Rev Drug Discov* 2013;**12**(3):191-204.
19. Linde K, F,ssler M, Meissner K. Placebo interventions, placebo effects and clinical practice. *Philosophical Transactions of the Royal Society B: Biological Sciences* 2011;**366**(1572):1905-12.
20. Klinger R, Colloca L, Bingel U, et al. Placebo analgesia: Clinical applications. *Pain* 2014;**155**(6):1055-58.
21. Kaptchuk TJ, Miller FG. Placebo Effects in Medicine. *N Engl J Med* 2015;**373**(1):8-9.
22. Dowell D, Haegerich TM, Chou R. CDC guideline for prescribing opioids for chronic pain—united states, 2016. *JAMA* 2016;**315**(15):1624-45.
23. Colloca L, Klinger R, Flor H, et al. Placebo analgesia: psychological and neurobiological mechanisms. *Pain* 2013;**154**(4):511-4.
24. Price DD, Finniss DG, Benedetti F. A comprehensive review of the placebo effect: Recent advances and current thought. *Annu Rev Psychol* 2008;**59**:565-90.



- 1  
2  
3 524 25. Finniss DG, Kaptchuk TJ, Miller FG, et al. Biological, clinical, and ethical advances of placebo  
4 525 effects. *Lancet* 2010;**375**(9715):686-95.
- 5 526 26. Manchikanti L, Giordano J, Fellows B, et al. Placebo and nocebo in interventional pain  
6 527 management: A friend or a foe - or simply foes? *Pain Physician* 2011;**14**:E157-E75.
- 7 528 27. Puhl AA, Reinhart CJ, Rok ER, et al. An examination of the observed placebo effect associated  
8 529 with the treatment of low back pain - a systematic review. *Pain Research & Management*  
9 530 2011;**16**(1):45-52.
- 10 531 28. Faria V, Fredrikson M, Furmark T. Imaging the placebo response: A neurofunctional review. *Eur*  
11 532 *Neuropsychopharmacol* 2008;**18**(7):473-85.
- 12 533 29. Vase L, Petersen GL, Riley Iii JL, et al. Factors contributing to large analgesic effects in placebo  
13 534 mechanism studies conducted between 2002 and 2007. *Pain* 2009;**145**(1-2):36-44.
- 14 535 30. Kirsch I. Placebo psychotherapy: Synonym or oxymoron? *J Clin Psychol* 2005;**61**(7):791-803.
- 15 536 31. Di Blasi Z, Harkness E, Ernst E, et al. Influence of context effects on health outcomes: a  
16 537 systematic review. *Lancet* 2001;**357**:757-62.
- 17 538 32. Strauss A, Corbin J. *Basics of Qualitative Research Techniques and Procedures for Developing*  
18 539 *Grounded Theory*. Thousand Oaks: Sage, 1998.
- 19 540 33. Meissner K, Kohls N, Colloca L. Introduction to placebo effects in medicine: mechanisms and  
20 541 clinical implications. *Philosophical Transactions of the Royal Society B: Biological Sciences*  
21 542 2011;**366**(1572):1783-89.
- 22 543 34. Price DD, Chung SK, Robinson ME. Conditioning, expectation, and desire for relief in placebo  
23 544 analgesia. *Seminars in Pain Medicine* 2005;**3**(1):15-21.
- 24 545 35. Benedetti F, Amanzio M. The placebo response: How words and rituals change the patient's  
25 546 brain. *Patient Educ Couns* 2011;**84**(3):413-19.
- 26 547 36. Goffaux P, Leonard G, Marchand S, et al. Placebo analgesia. In: Beaulieu P, Lussier D, Porreca F, et  
27 548 al., eds. *Pharmacology of Pain*. Seattle, WA: IASP Press, 2010:451-73.
- 28 549 37. Kirsch I. Response expectancy theory and application: A decennial review. *Appl Prev Psychol*  
29 550 1997;**6**(2):69-79.
- 30 551 38. Hyland ME, Whalley B. Motivational concordance: An important mechanism in self-help  
31 552 therapeutic rituals involving inert (placebo) substances. *J Psychosom Res* 2008;**65**(5):405-13.
- 32 553 39. Stewart-Williams S, Podd J. The placebo-effect: Dissolving the expectancy versus conditioning  
33 554 debate. *Psychol Bull* 2004;**130** (2):324-40.
- 34 555 40. Benedetti F. Placebo and the New Physiology of the Doctor-Patient Relationship. *Physiol Rev*  
35 556 2013;**93**(3):1207-46.
- 36 557 41. Jubb J, Bensing JM. The sweetest pill to swallow: How patient neurobiology can be harnessed to  
37 558 maximise placebo effects. *Neurosci Biobehav Rev* 2013;**37**(10, Part 2):2709-20.
- 38 559 42. Benedetti F, Maggi G, Lopiano L, et al. Open versus hidden medical treatments: The patient's  
39 560 knowledge about a therapy affects the therapy outcome. *Prevention & Treatment*  
40 561 2003;**6**(1):No.
- 41 562 43. Sandler AD, Bodfish JW. Open-label use of placebos in the treatment of ADHD: a pilot study.  
42 563 *Child Care Health Dev* 2008;**34**(1):104-10.
- 43 564 44. Mistiaen P, van Osch M, van Vliet L, et al. The effect of patient-practitioner communication on  
44 565 pain: a systematic review. *Eur J Pain* 2015.
- 45 566 45. Planès S, Villier C, Mallaret M. The nocebo effect of drugs. *Pharmacology Research &*  
46 567 *Perspectives* 2016;**4**(2):n/a-n/a.
- 47 568 46. Colloca L, Finniss D. Nocebo effects, patient-clinician communication, and therapeutic outcomes.  
48 569 *JAMA* 2012;**307**(6):567-8.
- 49 570 47. Witt CM, Martins F, Willich SN, et al. Can I help you? Physicians' expectations as predictor for  
50 571 treatment outcome. *European Journal of Pain* 2012;**16**(10):1455-66.
- 51 572 48. White P, Bishop FL, Prescott P, et al. Practice, practitioner or placebo? A multifactorial, mixed  
52 573 methods randomized controlled trial of acupuncture. *Pain* 2012;**153**:455-62.
- 53  
54  
55  
56  
57  
58  
59  
60

- 1  
2  
3 574 49. Rice T. 'The hallmark of a doctor': the stethoscope and the making of medical identity. *Journal of*  
4 575 *Material Culture* 2010;**15**(3):287-301.
- 5 576 50. Snyder CF, Aaronson NK, Choucair AK, et al. Implementing patient-reported outcomes  
6 577 assessment in clinical practice: a review of the options and considerations. *Qual Life Res*  
7 578 2012;**21**(8):1305-14.
- 8 579 51. Benedetti F, Carlino E, Piedimonte A. Increasing uncertainty in CNS clinical trials: the role of  
9 580 placebo, nocebo, and Hawthorne effects. *The Lancet Neurology*; **15**(7):736-47.
- 10 581 52. Drahota A, Ward D, Mackenzie H, et al. Sensory environment on health-related outcomes of  
11 582 hospital patients (Review). *Cochrane Database of Systematic Reviews* 2012;**3**:Art. No.:  
12 583 CD005315. DOI: 10.1002/14651858.CD005315.pub2.
- 13 584 53. Dijkstra K, Pieterse M, Pruy A. Physical environmental stimuli that turn healthcare facilities into  
14 585 healing environments through psychologically mediated effects: systematic review. *J Adv*  
15 586 *Nurs* 2006;**56**(2):166-81.
- 16 587 54. Feffer K, Lichtenberg P, Becker G, et al. A comparative study with depressed patients on the  
17 588 acceptability of placebo use. *Gen Hosp Psychiatry* 2016;**41**:53-6.
- 18 589 55. Ortiz R, Chandros Hull S, Colloca L. Patient attitudes about the clinical use of placebo: qualitative  
19 590 perspectives from a telephone survey. *BMJ Open* 2016;**6**(4).
- 20 591 56. Bishop FL, Howick J, Heneghan C, et al. Placebo use in the United Kingdom: a qualitative study  
21 592 exploring GPs' views on placebo effects in clinical practice. *Fam Pract* 2014;**Advance**  
22 593 **Access**:1-7. doi:10.1093/fampra/cmu016.
- 23 594 57. Bishop FL, Aizlewood L, Adams AEM. When and Why Placebo-Prescribing Is Acceptable and  
24 595 Unacceptable: A Focus Group Study of Patients' Views. *PLoS One* 2014;**9**(7):e101822.
- 25 596 58. Street, Jr., Makoul G, Arora NK, et al. How does communication heal? Pathways linking clinician-  
26 597 patient communication to health outcomes. *Patient Educ Couns* 2009;**74**(3):295-301.
- 27 598 59. Greville-Harris M, Dieppe P. Bad Is More Powerful than Good: The Nocebo Response in Medical  
28 599 Consultations. *The American Journal of Medicine* 2015;**128**(2):126-29.
- 29 600 60. Bensing JM, Verheul W. The silent healer: The role of communication in placebo effects. *Patient*  
30 601 *Educ Couns* 2010;**80**(3):293-99.
- 31 602 61. Kirsch I. Conditioning, expectancy, and the placebo effect: Comment on Stewart-Williams and  
32 603 Podd (2004). *Psychol Bull* 2004;**130**(2):341-43.
- 33 604 62. Fassler M, Gnadinger M, Rosemann T, et al. Use of placebo interventions among Swiss primary  
34 605 care providers. *BMC Health Serv Res* 2009;**9**(1):144.
- 35 606 63. Howick J, Bishop FL, Heneghan C, et al. Placebo use in the United Kingdom: results from a  
36 607 national survey of primary care practitioners. *PLoS One* 2013;**8**(3):e58247.  
37 608 doi:10.1371/journal.pone.0058247.
- 38 609 64. Kirsch I, Sapirstein G. Listening to prozac but hearing placebo: A meta-analysis of antidepressant  
39 610 medication. *Prevention & Treatment* 1998;**1** Article 0002a, posted June 26, 1998.
- 40 611 65. Patel SM, Stason WB, Legedza A, et al. The placebo effect in irritable bowel syndrome trials: a  
41 612 meta-analysis. *Neurogastroenterol Motil* 2005;**17**(3):332-40.
- 42 613 66. Ford AC, Moayyedi P. Meta-analysis: factors affecting placebo response rate in the irritable  
43 614 bowel syndrome. *Aliment Pharmacol Ther* 2010;**32**(2):144-58.
- 44 615 67. Bélanger L, Vallières A, Ivers H, et al. Meta-analysis of sleep changes in control groups of  
45 616 insomnia treatment trials. *J Sleep Res* 2007;**16**(1):77-84.
- 46 617 68. Kaptchuk TJ, Kelley JM, Conboy LA, et al. Components of placebo effect: randomised controlled  
47 618 trial in patients with irritable bowel syndrome. *Br Med J* 2008;**336**:999-1003.
- 48 619 69. Suarez-Almazor ME, Looney C, Liu Y, et al. A randomized controlled trial of acupuncture for  
49 620 osteoarthritis of the knee: Effects of patient-provider communication. *Arthritis Care Res*  
50 621 2010;**62**(9):1229-36.
- 51 622 70. Kaptchuk TJ, Stason WB, Davis RB, et al. Sham device v inert pill: randomised controlled trial of  
52 623 two placebo treatments. *Br Med J* 2006;**332**(7538):391-94.

- 1  
2  
3 624 71. Vase L, Baram S, Takakura N, et al. Specifying the nonspecific components of acupuncture  
4 625 analgesia. *Pain* 2013;**154**(9):1659-67.  
5 626 72. Sandler A, Glesne C, Geller G. Children's and parents' perspectives on open-label use of placebos  
6 627 in the treatment of ADHD. *Child Care Health Dev* 2008;**34**(1):111-20.  
7 628 73. Michie S, Abraham C, Whittington C, et al. Effective techniques in healthy eating and physical  
8 629 activity interventions: a meta-regression. *Health Psychol* 2009;**28**(6):690-701.

10 630  
11  
12  
13  
14  
15  
16  
17  
18  
19  
20  
21  
22  
23  
24  
25  
26  
27  
28  
29  
30  
31  
32  
33  
34  
35  
36  
37  
38  
39  
40  
41  
42  
43  
44  
45  
46  
47  
48  
49  
50  
51  
52  
53  
54  
55  
56  
57  
58  
59  
60

For peer review only

1  
2  
3  
4  
5  
6  
7  
8  
9  
10  
11  
12  
13  
14  
15  
16  
17  
18  
19  
20  
21  
22  
23  
24  
25  
26  
27  
28  
29  
30  
31  
32  
33  
34  
35  
36  
37  
38  
39  
40  
41  
42  
43  
44  
45  
46  
47  
48  
49  
50  
51  
52  
53  
54  
55  
56  
57  
58  
59  
60



Flowchart Showing Identification of Studies

155x127mm (300 x 300 DPI)

## Supplementary Digital Content

### List of Included Studies

[1-169]

- [1] Alfano AP, Taylor AG, Foresman PA, Dunk PR, McConnell GG, Gillies GT. Static magnetic fields for treatment of fibromyalgia: A randomized controlled trial. *J Altern Complement Med* 2001;7(1):53.
- [2] Alford JW, Fadale PD. Evaluation of postoperative bupivacaine infusion for pain management after anterior cruciate ligament reconstruction. *Arthroscopy-the Journal of Arthroscopic and Related Surgery* 2003;19(8):855.
- [3] Amanzio M, Benedetti F. Neuropharmacological Dissection of Placebo Analgesia: Expectation-Activated Opioid Systems versus Conditioning-Activated Specific Subsystems. *The Journal of Neuroscience* 1999;19(1):484-494.
- [4] Amanzio M, Pollo A, Maggi G, Benedetti F. Response variability to analgesics: a role for non-specific activation of endogenous opioids. *Pain* 2001;90(3):205-215.
- [5] Amlie E, Weber H, Holme I. Treatment of Acute Low-back Pain with Piroxicam: Results of a Double-blind Placebo-controlled Trial. *Spine* 1987;12(5):473-476.
- [6] Andersen AN, Damm P, Tabor A, Pedersen IM, Harring M. Prevention of Breast Pain and Milk Secretion with Bromocriptine After Second-Trimester Abortion. *Acta Obstet Gynecol Scand* 1990;69(3):235-238.
- [7] Aslaksen PM, Flaten MA. The Roles of Physiological and Subjective Stress in the Effectiveness of a Placebo on Experimentally Induced Pain. *Psychosom Med* 2008;70(7):811-818.
- [8] Atkinson JH, Slater MA, Williams RA, Zisook S, Patterson TL, Grant I, Wahlgren DR, Abramson I, Garfin SR. A placebo-controlled randomized clinical trial of nortriptyline for chronic low back pain. *Pain* 1998;76(3):287-296.
- [9] Bannwarth B, Allaert FA, Avouac B, Rossignol M, Rozenberg S, Valat JP. A randomized, double-blind, placebo controlled triphosphate in study of oral adenosine subacute low back pain. *J Rheumatol* 2005;32(6):1114-1117.
- [10] Basford JR, Sheffield CG, Harmsen WS. Laser therapy: a randomized, controlled trial of the effects of low-intensity Nd:YAG laser irradiation on musculoskeletal back pain. *Arch Phys Med Rehabil* 1999;80(6):647-652.
- [11] Basmajian JV. Acute back pain and spasm. A controlled multicenter trial of combined analgesic and antispasm agents. *Spine (Phila Pa 1976)* 1989;14(4):438-439.
- [12] Benedetti F. The opposite effects of the opiate antagonist naloxone and the cholecystokinin antagonist proglumide on placebo analgesia. *Pain* 1996;64(3):535-543.
- [13] Benedetti F, Amanzio M, Baldi S, Casadio C, Cavallo A, Mancuso M, Ruffini E, Oliaro A, Maggi G. The specific effects of prior opioid exposure on placebo analgesia and placebo respiratory depression. *Pain* 1998;75(2-3):313-319.
- [14] Benedetti F, Amanzio M, Casadio C, Oliaro A, Maggi G. Blockade of nocebo hyperalgesia by the cholecystokinin antagonist proglumide. *Pain* 1997;71(2):135-140.
- [15] Benedetti F, Amanzio M, Maggi G. Potentiation of placebo analgesia by proglumide. *The Lancet* 1995;346(8984):1231.
- [16] Benedetti F, Amanzio M, Vighetti S, Asteggiano G. The Biochemical and Neuroendocrine Bases of the Hyperalgesic Nocebo Effect. *The Journal of Neuroscience* 2006;26(46):12014-12022.
- [17] Benedetti F, Arduino C, Amanzio M. Somatotopic activation of opioid systems by target-directed expectations of analgesia. *J Neurosci* 1999;19(9):3639-3648.
- [18] Benedetti F, Arduino C, Costa S, Vighetti S, Tarenzi L, Rainero I, Asteggiano G. Loss of expectation-related mechanisms in Alzheimer's disease makes analgesic therapies less effective. *Pain* 2006;121(1):133-144.

- 1  
2  
3 [19] Benedetti F, Pollo A, Lopiano L, Lanotte M, Vighetti S, Rainero I. Conscious expectation and  
4 unconscious conditioning in analgesic, motor, and hormonal placebo/nocebo responses. *The*  
5 *Journal of Neuroscience* 2003;23(10):4315-4323.  
6  
7 [20] Benedetti FMD, Amanzio MMS, Casadio CMD, Cavallo AMD, Cianci RMD, Giobbe RMD, Mancuso  
8 MMD, Ruffini EMD, Maggi GMD. Control of Postoperative Pain by Transcutaneous Electrical  
9 Nerve Stimulation After Thoracic Operations. *The Annals of Thoracic Surgery*  
10 1997;63(3):773-776.  
11  
12 [21] Berry H, Hutchinson DR. A multicentre placebo-controlled study in general practice to evaluate  
13 the efficacy and safety of tizanidine in acute low-back pain. *J Int Med Res* 1988;16(2):75-82.  
14  
15 [22] Bingel U, Lorenz J, Schoell E, Weiller C, Büchel C. Mechanisms of placebo analgesia: rACC  
16 recruitment of a subcortical antinociceptive network. *Pain* 2006;120(1):8-15.  
17  
18 [23] Birbara CA, Puopolo AD, Munoz DR, Sheldon EA, Mangione A, Bohidar NR, Geba GP. Treatment  
19 of chronic low back pain with etoricoxib, a new cyclo-oxygenase-2 selective inhibitor:  
20 improvement in pain and disability--a randomized, placebo-controlled, 3-month trial. *The*  
21 *Journal of Pain : official journal of the American Pain Society* 2003;4(6):307-315.  
22  
23 [24] Biro P, Meier T, Cummins AS. Comparison of topical anaesthesia methods for venous  
24 cannulation in adults. *Eur J Pain* 1997;1(1):37-42.  
25  
26 [25] Blanchard EB, Appelbaum KA, Radnitz CL, Michultka D, Morrill B, Kirsch C, Hillhouse J, Evans DD,  
27 Guarnieri P, Attanasio V, et al. Placebo-controlled evaluation of abbreviated progressive  
28 muscle relaxation and of relaxation combined with cognitive therapy in the treatment of  
29 tension headache. *J Consult Clin Psychol* 1990;58(2):210-215.  
30  
31 [26] Blanchard EB, Appelbaum KA, Radnitz CL, Morrill B, Michultka D, Kirsch C, Guarnieri P, Hillhouse  
32 J, Evans DD, Jaccard J, et al. A controlled evaluation of thermal biofeedback and thermal  
33 biofeedback combined with cognitive therapy in the treatment of vascular headache. *J*  
34 *Consult Clin Psychol* 1990;58(2):216-224.  
35  
36 [27] Boissel JP, Philippon AM, Gauthier E, Schbath J, Destors JM. Time course of long-term placebo  
37 therapy effects in angina pectoris. *Eur Heart J* 1986;7(12):1030-1036.  
38  
39 [28] Bova JG, Bhattacharjee N, Jurdi R, Bennett WF. Comparison of no medication, placebo, and  
40 hyoscyamine for reducing pain during a barium enema. *Am J Roentgenol* 1999;172(5):1285-  
41 1287.  
42  
43 [29] Brinkhaus B, Witt CM, Jena S, Linde K, Streng A, Wagenpfeil S, Irnich D, Walther HU, Melchart D,  
44 Willich SN. Acupuncture in patients with chronic low back pain - A randomized controlled  
45 trial. *Arch Intern Med* 2006;166(4):450-457.  
46  
47 [30] Camilleri M, Northcutt AR, Kong S, Dukes GE, McSorley D, Mangel AW. Efficacy and safety of  
48 alosetron in women with irritable bowel syndrome: a randomised, placebo-controlled trial.  
49 *The Lancet* 2000;355(9209):1035-1040.  
50  
51 [31] Carbajal R, Chauvet X, Couderc S, Olivier-Martin M. Randomised trial of analgesic effects of  
52 sucrose, glucose, and pacifiers in term neonates. *BMJ* 1999;319(7222):1393-1397.  
53  
54 [32] Carette S, Leclaire R, Marcoux S, Morin F, Blaise GA, St-Pierre A, Truchon R, Parent F, Levesque J,  
55 Bergeron V, Montminy P, Blanchette C. Epidural corticosteroid injections for sciatica due to  
56 herniated nucleus pulposus. *N Engl J Med* 1997;336(23):1634-1640.  
57  
58 [33] Charron J, Rainville P, Marchand S. Direct comparison of placebo effects on clinical and  
59 experimental pain. *Clin J Pain* 2006;22(2):204-211.  
60  
61 [34] Cherkin DC, Sherman KJ, Avins AL, et al. A randomized trial comparing acupuncture, simulated  
62 acupuncture, and usual care for chronic low back pain. *Arch Intern Med* 2009;169(9):858-  
63 866.  
64  
65 [35] Chrubasik S, Eisenberg E, Balan E, Weinberger T, Luzzati R, Conrath C. Treatment of low back  
66 pain exacerbations with willow bark extract: a randomized double-blind study. *Am J Med*  
2000;109(1):9-14.

- 1  
2  
3  
4 [36] Chrubasik S, Junck H, Breitschwerdt H, Conradt C, Zappe H. Effectiveness of Harpagophytum  
5 extract WS 1531 in the treatment of exacerbation of low back pain: a randomized, placebo-  
6 controlled, double-blind study. *Eur J Anaesthesiol* 1999;16(2):118-129.
- 7 [37] Chung SK, Price DD, Verne GN, Robinson ME. Revelation of a personal placebo response: Its  
8 effects on mood, attitudes and future placebo responding. *Pain* 2007;132(3):281-288.
- 9 [38] Classen W, Feingold E, Netter P. Influence of sensory suggestibility on treatment outcome in  
10 headache patients. *Neuropsychobiology* 1983;10(1):44-47.
- 11 [39] Coats TL, Borenstein DG, Nangia NK, Brown MT. Effects of valdecoxib in the treatment of  
12 chronic low back pain: results of a randomized, placebo-controlled trial. *Clin Ther*  
13 2004;26(8):1249-1260.
- 14 [40] Colloca L, Benedetti F. How prior experience shapes placebo analgesia. *Pain* 2006;124(1-2):126-  
15 133.
- 16 [41] Colloca L, Benedetti F. Placebo analgesia induced by social observational learning. *Pain*  
17 2009;144(1-2):28-34.
- 18 [42] Colloca L, Petrovic P, Wager TD, Ingvar M, Benedetti F. How the number of learning trials affects  
19 placebo and nocebo responses. *Pain* 2010;151(2):430-439.
- 20 [43] Colloca L, Sigauco M, Benedetti F. The role of learning in nocebo and placebo effects. *Pain*  
21 2008;136(1-2):211-218.
- 22 [44] Conn IG, Marshall AH, Yadav SN, Daly JC, Jaffer M. Transcutaneous electrical nerve stimulation  
23 following appendectomy: the placebo effect. *Ann R Coll Surg Engl* 1986;68(4):191-192.
- 24 [45] Corson SL, Batzer FR, Gocial B, Kelly M, Gutmann JN, Go KJ, English ME. Is paracervical block  
25 anesthesia for oocyte retrieval effective? *Fertil Steril* 1994;62(1):133-136.
- 26 [46] Costello M, Ramundo M, Christopher NC, Powell KR. Ethyl Vinyl Chloride Vapocoolant Spray  
27 Fails to Decrease Pain Associated with Intravenous Cannulation in Children. *Clin Pediatr*  
28 (Phila) 2006;45(7):628-632.
- 29 [47] Coyne PJ, MacMurren M, Izzo T, Kramer T. Transcutaneous electrical nerve stimulator for  
30 procedural pain associated with intravenous needlesticks. *J Intraven Nurs* 1995;18(5):263-  
31 267.
- 32 [48] Dapas F, Hartman SF, Martinez L, Northrup BE, Nussdorf RT, Silberman HM, Gross H. Baclofen  
33 for the treatment of acute low-back syndrome. A double-blind comparison with placebo.  
34 *Spine (Phila Pa 1976)* 1985;10(4):345-349.
- 35 [49] De Pascalis V, Chiaradia C, Carotenuto E. The contribution of suggestibility and expectation to  
36 placebo analgesia phenomenon in an experimental setting. *Pain* 2002;96(3):393-402.
- 37 [50] deCharms RC, Maeda F, Glover GH, Ludlow D, Pauly JM, Soneji D, Gabrieli JDE, Mackey SC.  
38 Control over brain activation and pain learned by using real-time functional MRI. *Proc Natl*  
39 *Acad Sci U S A* 2005;102(51):18626-18631.
- 40 [51] Defrin R, Ariel E, Peretz C. Segmental noxious versus innocuous electrical stimulation for chronic  
41 pain relief and the effect of fading sensation during treatment. *Pain* 2005;115(1):152-160.
- 42 [52] Dickens C, Jayson M, Sutton C, Creed F. The relationship between pain and depression in a trial  
43 using paroxetine in sufferers of chronic low back pain. *Psychosomatics* 2000;41(6):490-499.
- 44 [53] Ditto B, France CR. The effects of applied tension on symptoms in French-speaking blood  
45 donors: a randomized trial. *Health Psychol* 2006;25(3):433-437.
- 46 [54] Ditto B, France CR, Lavoie P, Roussos M, Adler PS. Reducing reactions to blood donation with  
47 applied muscle tension: a randomized controlled trial. *Transfusion (Paris)* 2003;43(9):1269-  
48 1275.
- 49 [55] Dreiser RL, Marty M, Ionescu E, Gold M, Liu JH. Relief of acute low back pain with diclofenac-K  
50 12.5 mg tablets: a flexible dose, ibuprofen 200 mg and placebo-controlled clinical trial. *Int J*  
51 *Clin Pharmacol Ther* 2003;41(9):375-385.
- 52 [56] Erdogmus CB, Resch KL, Sabitzer R, Muller H, Nuhr M, Schoggl A, Posch M, Osterode W,  
53 Ungersbock K, Ebenbichler GR. Physiotherapy-based rehabilitation following disc herniation  
54  
55  
56  
57  
58  
59  
60

- operation: results of a randomized clinical trial. *Spine (Phila Pa 1976)* 2007;32(19):2041-2049.
- [57] Faas A, Chavannes AW, van Eijk JT, Gubbels JW. A randomized, placebo-controlled trial of exercise therapy in patients with acute low back pain. *Spine (Phila Pa 1976)* 1993;18(11):1388-1395.
- [58] Fanti L, Gemma M, Passaretti S, Guslandi M, Testoni PA, Casati A, Torri G. Electroacupuncture Analgesia for Colonoscopy: A Prospective, Randomized, Placebo-Controlled Study. *Am J Gastroenterol* 2003;98(2):312-316.
- [59] Forster EL, Kramer JF, Lucy SD, Scudds RA, Novick RJ. Effect of tens on pain, medications, and pulmonary function following coronary artery bypass graft surgery. *CHEST Journal* 1994;106(5):1343-1348.
- [60] Foster KA, Liskin J, Cen S, Abbott A, Armisen V, Globe D, Knox L, Mitchell M, Shtir C, Azen S. The Trager approach in the treatment of chronic headache: a pilot study. *Altern Ther Health Med* 2004;10(5):40-46.
- [61] Foster NE, Thomas E, Barlas P, Hill JC, Young J, Mason E, Hay EM. Acupuncture as an adjunct to exercise based physiotherapy for osteoarthritis of the knee: randomised controlled trial. *BMJ* 2007;335(7617):436.
- [62] Frega A, Stentella P, Di Renzi F, Gallo G, Palazzetti PL, Del Vescovo M, Ciccarone M, Pachi A. Pain evaluation during carbon dioxide laser vaporization for cervical intraepithelial neoplasia: a randomized trial. *Clin Exp Obstet Gynecol* 1994;21(3):188-191.
- [63] Gale GD, Rothbart PJ, Li Y. Infrared therapy for chronic low back pain: a randomized, controlled trial. *Pain Res Manag* 2006;11(3):193-196.
- [64] Geers A, Helfer S, Weiland P, Kosbab K. Expectations and Placebo Response: A Laboratory Investigation into the Role of Somatic Focus. *J Behav Med* 2006;29(2):171-178.
- [65] Geers AL, Wellman JA, Fowler SL, Helfer SG, France CR. Dispositional optimism predicts placebo analgesia. *J Pain* 2010;11(11):1165-1171.
- [66] Goffaux P, Redmond WJ, Rainville P, Marchand S. Descending analgesia--when the spine echoes what the brain expects. *Pain* 2007;130(1-2):137-143.
- [67] Goodenough B, Kempel L, Champion GD, Laubreaux L, Nicholas MK, Ziegler JB, McInerney M. An investigation of the placebo effect and age-related factors in the report of needle pain from venipuncture in children. *Pain* 1997;72(3):383-391.
- [68] Goodkin K, Gullion CM, Agras WS. A randomized, double-blind, placebo-controlled trial of trazodone hydrochloride in chronic low back pain syndrome. *J Clin Psychopharmacol* 1990;10(4):269-278.
- [69] Grevert P, Albert LH, Goldstein A. Partial antagonism of placebo analgesia by naloxone. *Pain* 1983;16(2):129-143.
- [70] Haake M, Muller HH, Schade-Brittinger C, Basler HD, Schafer H, Maier C, Endres HG, Trampisch HJ, Molsberger A. German acupuncture trials (GERAC) for chronic low back pain. Randomized, multicenter, blinded, parallel-group trial with 3 groups *Arch Intern Med* 2007;167(17):1892-1898.
- [71] Hale ME, Ahdieh H, Ma T, Rauck R. Efficacy and safety of OPANA ER (oxymorphone extended release) for relief of moderate to severe chronic low back pain in opioid-experienced patients: a 12-week, randomized, double-blind, placebo-controlled study. *The journal of pain : official journal of the American Pain Society* 2007;8(2):175-184.
- [72] Hargreaves A, Lander J. Use of Transcutaneous Electrical Nerve Stimulation For Postoperative Pain. *Nurs Res* 1989;38(3):159-160.
- [73] Hargreaves KM, Dionne RA, Mueller GP. Plasma Beta-Endorphin-like Immunoreactivity, Pain and Anxiety Following Administration of Placebo in Oral Surgery Patients. *J Dent Res* 1983;62(11):1170-1173.
- [74] Hashish I, Hai HK, Harvey W, Feinmann C, Harris M. Reduction of postoperative pain and swelling by ultrasound treatment: a placebo effect. *Pain* 1988;33(3):303-311.



- 1  
2  
3 [75] Hashish I, Harvey W, Harris M. Anti-inflammatory effects of ultrasound therapy: evidence for a  
4 major placebo effect. *Rheumatology (Oxford)* 1986;25(1):77-81.  
5  
6 [76] Helms JM. Acupuncture for the management of primary dysmenorrhea. *Obstet Gynecol*  
7 1987;69(1):51-56.  
8 [77] Hoirus KT, Pflieger B, McDuffie FC, Cotsonis G, Elsangak O, Hinson R, Verzosa GT. A randomized  
9 clinical trial comparing chiropractic adjustments to muscle relaxants for subacute low back  
10 pain. *J Manipulative Physiol Ther* 2004;27(6):388-398.  
11 [78] Hong C-Z, Chen Y-C, Pon CH, Yu J. Immediate Effects of Various Physical Medicine Modalities on  
12 Pain Threshold of an Active Myofascial Trigger Point. *Journal of Musculoskeletal Pain*  
13 1993;1(2):37-53.  
14  
15 [79] Hruby G, Ames C, Chen C, Yan Y, Sagar J, Baron P, Landman J. Assessment of efficacy of  
16 transcutaneous electrical nerve stimulation for pain management during office-based  
17 flexible cystoscopy. *Urology* 2006;67(5):914-917.  
18 [80] Hyland MR, Webber-Gaffney A, Cohen L, Lichtman SW. Randomized Controlled Trial of  
19 Calcaneal Taping, Sham Taping, and Plantar Fascia Stretching for the Short-Term  
20 Management of Plantar Heel Pain. *J Orthop Sports Phys Ther* 2006;36(6):364-371.  
21 [81] Johansen O, Brox J, Flaten MA. Placebo and Nocebo Responses, Cortisol, and Circulating Beta-  
22 Endorphin. *Psychosom Med* 2003;65(5):786-790.  
23 [82] Kaptchuk TJ, Stason WB, Davis RB, Legedza ATR, Schnyer RN, Kerr CE, Stone DA, Nam BH, Kirsch  
24 I, Goldman RH. Sham device v inert pill: randomised controlled trial of two placebo  
25 treatments. *Br Med J* 2006;332(7538):391-394.  
26  
27 [83] Katz J, Pennella-Vaughan J, Hetzel RD, Kanazi GE, Dworkin RH. A Randomized, Placebo-  
28 Controlled Trial of Bupropion Sustained Release in Chronic Low Back Pain. *J Pain*  
29 2005;6(10):656-661.  
30  
31 [84] Katz N, Ju WD, Krupa DA, Sperling RS, Bozalis Rodgers D, Gertz BJ, Gimbel J, Coleman S, Fisher C,  
32 Nabizadeh S, Borenstein D. Efficacy and safety of rofecoxib in patients with chronic low back  
33 pain: results from two 4-week, randomized, placebo-controlled, parallel-group, double-blind  
34 trials. *Spine (Phila Pa 1976)* 2003;28(9):851-858; discussion 859.  
35 [85] Katz N, Rauck R, Ahdieh H, Ma T, Gerritsen van der Hoop R, Kerwin R, Podolsky G. A 12-week,  
36 randomized, placebo-controlled trial assessing the safety and efficacy of oxymorphone  
37 extended release for opioid-naive patients with chronic low back pain. *Curr Med Res Opin*  
38 2007;23(1):117-128.  
39 [86] Keltner JR, Furst A, Fan C, Redfern R, Inglis B, Fields HL. Isolating the Modulatory Effect of  
40 Expectation on Pain Transmission: A Functional Magnetic Resonance Imaging Study. *The*  
41 *Journal of Neuroscience* 2006;26(16):4437-4443.  
42 [87] Kerr AR, Drexel CA, Spielman AI. The efficacy and safety of 50 mg penicillin G potassium troches  
43 for recurrent aphthous ulcers. *Oral Surg Oral Med Oral Pathol Oral Radiol Endod*  
44 2003;96(6):685-694.  
45 [88] Ketenci A, Ozcan E, Karamursel S. Assessment of efficacy and psychomotor performances of  
46 thicolchicoside and tizanidine in patients with acute low back pain. *Int J Clin Pract*  
47 2005;59(7):764-770.  
48 [89] Klaber Moffett JA, Richardson PH, Frost H, Osborn A. A placebo controlled double blind trial to  
49 evaluate the effectiveness of pulsed short wave therapy for osteoarthritic hip and knee pain.  
50 *Pain* 1996;67(1):121-127.  
51 [90] Klein RG, Eek BC. Low-energy laser treatment and exercise for chronic low back pain: double-  
52 blind controlled trial. *Arch Phys Med Rehabil* 1990;71(1):34-37.  
53 [91] Kober A, Scheck T, Greher M, Lieba F, Fleischhackl R, Fleischhackl S, Randunsky F, Hoerauf K.  
54 Prehospital Analgesia with Acupressure in Victims of Minor Trauma: A Prospective,  
55 Randomized, Double-Blinded Trial. *Anesth Analg* 2002;95(3):723-727 710.1213/0000539-  
56 200209000-200200035.  
57  
58  
59  
60

- 1  
2  
3 [92] Kong J, Gollub RL, Polich G, Kirsch I, LaViolette P, Vangel M, Rosen B, Kaptchuk TJ. A Functional  
4 Magnetic Resonance Imaging Study on the Neural Mechanisms of Hyperalgesic Nocebo  
5 Effect. *The Journal of Neuroscience* 2008;28(49):13354-13362.
- 6  
7 [93] Kong J, Gollub RL, Rosman IS, Webb JM, Vangel MG, Kirsch I, Kaptchuk TJ. Brain activity  
8 associated with expectancy-enhanced placebo analgesia as measured by functional  
9 magnetic resonance imaging. *J Neurosci* 2006;26(2):381-388.
- 10  
11 [94] Kotani N, Kushikata T, Suzuki A, Hashimoto H, Muraoka M, Matsuki A. Insertion of intradermal  
12 needles into painful points provides analgesia for intractable abdominal scar pain. *Reg*  
13 *Anesth Pain Med* 2001;26(6):532-538.
- 14  
15 [95] Kupers R, Maeyaert J, Boly M, Faymonville ME, Laureys S. Naloxone-insensitive epidural placebo  
16 analgesia in a chronic pain patient. *Anesthesiology* 2007;106(6):1239-1242.
- 17  
18 [96] Lander J, Fowler-Kerry S. TENS for children's procedural pain. *Pain* 1993;52(2):209-216.
- 19  
20 [97] Leibing E, Leonhardt U, Koster G, Goerlitz A, Rosenfeldt J, Hilgers R, Ramadori G. Acupuncture  
21 treatment of chronic low-back pain - a randomized, blinded, placebo-controlled trial with 9-  
22 month follow-up. *Pain* 2002;96 189-196.
- 23  
24 [98] Levine JD, Gordon NC. Influence of the method of drug administration on analgesic response.  
25 *Nature* 1984;312(5996):755-756.
- 26  
27 [99] Licciardone JC, Stoll ST, Fulda KG, Russo DP, Siu J, Winn W, Swift JJ. Osteopathic Manipulative  
28 Treatment for Chronic Low Back Pain: A Randomized Controlled Trial. *Spine*  
29 2003;28(13):1355-1362.
- 30  
31 [100] Lieberman MD, Jarcho JM, Berman S, Naliboff BD, Suyenobu BY, Mandelkern M, Mayer EA. The  
32 neural correlates of placebo effects: a disruption account. *Neuroimage* 2004;22(1):447-455.
- 33  
34 [101] Limoges MF, Rickabaugh B. Evaluation of TENS During Screening Flexible Sigmoidoscopy.  
35 *Gastroenterol Nurs* 2004;27(2):61-68.
- 36  
37 [102] Lin J-G, Lo M-W, Wen Y-R, Hsieh C-L, Tsai S-K, Sun W-Z. The effect of high and low frequency  
38 electroacupuncture in pain after lower abdominal surgery. *Pain* 2002;99(3):509-514.
- 39  
40 [103] Linde K, Streng A, Jurgens S, Hoppe A, Brinkhaus B, Witt C, Wagenpfeil S, Pfaffenrath V,  
41 Hammes MG, Weidenhammer W, Willich SN, Melchart D. Acupuncture for patients with  
42 migraine. A randomized controlled trial. *Journal of the American Medical Association*  
43 2005;293 (2118):2125.
- 44  
45 [104] Lioffi C, Hatira P. Clinical Hypnosis in the Alleviation of Procedure-Related Pain in Pediatric  
46 Oncology Patients. *Int J Clin Exp Hypn* 2003;51(1):4-28.
- 47  
48 [105] Lipman JJ, Miller BE, Mays KS, Miller MN, North WC, Byrne WL. Peak B endorphin  
49 concentration in cerebrospinal fluid: reduced in chronic pain patients and increased during  
50 the placebo response. *Psychopharmacology (Berl)* 1990;102(1):112-116.
- 51  
52 [106] Manchikanti L, Pampati V, Damron K. The role of placebo and nocebo effects of perioperative  
53 administration of sedatives and opioids in interventional pain management. *Pain Physician*  
54 2005;8(4):349-355.
- 55  
56 [107] Martikainen IK, Hagelberg N, Mansikka H, Hietala J, Någren K, Scheinin H, Pertovaara A.  
57 Association of striatal dopamine D2/D3 receptor binding potential with pain but not tactile  
58 sensitivity or placebo analgesia. *Neurosci Lett* 2005;376(3):149-153.
- 59  
60 [108] Matre D, Casey KL, Knardahl S. Placebo-Induced Changes in Spinal Cord Pain Processing. *The*  
*Journal of Neuroscience* 2006;26(2):559-563.
- [109] Mayberg HS, Silva JA, Brannan SK, Tekell JL, Mahurin RK, McGinnis S, Jerabek PA. The  
functional neuroanatomy of the placebo effect. *A J Psychiatry* 2002;159(5):728-737.
- [110] Melchart D, Streng A, Hoppe A, Brinkhaus B, Witt C, Wagenpfeil S, Pfaffenrath V, Hammes M,  
Hummelsberger J, Irnich D, Weidenhammer W, Willich SN, Linde K. Acupuncture in patients  
with tension-type headache: randomised controlled trial. *Br Med J* 2005;331 376-382.
- [111] Molsberger AF, Mau J, Pawelec DB, Winkler J. Does acupuncture improve the orthopedic  
management of chronic low back pain – a randomized, blinded, controlled trial with 3  
months follow up. *Pain* 2002;99(3):579-587.

- 1  
2  
3  
4 [112] Montgomery G, Kirsch I. Mechanisms of Placebo Pain Reduction: An Empirical Investigation. *Psychological Science* 1996;7(3):174-176.
- 5  
6 [113] Montgomery GH, Kirsch I. Classical conditioning and the placebo effect. *Pain* 1997;72(1-2):107-  
7 113.
- 8 [114] Morton DL, Watson A, El-Deredy W, Jones AKP. Reproducibility of placebo analgesia: Effect of  
9 dispositional optimism. *Pain* 2009;146(1&#2):194-198.
- 10 [115] Muehlbacher M, Nickel MK, Kettler C, Tritt K, Lahmann C, Leiberich PK, Nickel C, Krawczyk J,  
11 Mitterlehner FO, Rother WK, Loew TH, Kaplan P. Topiramate in treatment of patients with  
12 chronic low back pain: a randomized, double-blind, placebo-controlled study. *Clin J Pain*  
13 2006;22(6):526-531.
- 14 [116] Nemoto H, Nemoto Y, Toda H, Mikuni M, Fukuyama H. Placebo analgesia: a PET study. *Exp*  
15 *Brain Res* 2007;179(4):655-664.
- 16 [117] Ockene JK, Barad DH, Cochrane BB, Larson JC, Gass M, Wassertheil-Smoller S, Manson JE,  
17 Barnabei VM, Lane DS, Brzyski RG, Rosal MC, Wylie-Rosett J, Hays J. Symptom experience  
18 after discontinuing use of estrogen plus progestin. *JAMA* 2005;294(2):183-193.
- 19 [118] Pally RM, Seger W, Adler JL, Ettlinger RE, Quaidoo EA, Lipetz R, O'Brien K, Mucciola L, Skalky  
20 CS, Petruschke RA, Bohidar NR, Geba GP. Etoricoxib reduced pain and disability and  
21 improved quality of life in patients with chronic low back pain: a 3 month, randomized,  
22 controlled trial. *Scand J Rheumatol* 2004;33(4):257-266.
- 23 [119] Pariente J, White P, Frackowiak RSJ, Lewith G. Expectancy and belief modulate the neuronal  
24 substrates of pain treated by acupuncture. *Neuroimage* 2005;25(4):1161-1167.
- 25 [120] Peloso PM, Fortin L, Beaulieu A, Kamin M, Rosenthal N. Analgesic efficacy and safety of  
26 tramadol/ acetaminophen combination tablets (Ultracet) in treatment of chronic low back  
27 pain: a multicenter, outpatient, randomized, double blind, placebo controlled trial. *J*  
28 *Rheumatol* 2004;31(12):2454-2463.
- 29 [121] Petrovic P, Kalso E, Petersson KM, Ingvar M. Placebo and opioid analgesia-- imaging a shared  
30 neuronal network. *Science* 2002;295(5560):1737-1740.
- 31 [122] Pollo A, Amanzio M, Arslanian A, Casadio C, Maggi G, Benedetti F. Response expectancies in  
32 placebo analgesia and their clinical relevance. *Pain* 2001;93(1):77-84.
- 33 [123] Pollo A, Vighetti S, Rainero I, Benedetti F. Placebo analgesia and the heart. *Pain* 2003;102(1-  
34 2):125-133.
- 35 [124] Preyde M. Effectiveness of massage therapy for subacute low-back pain: a randomized  
36 controlled trial. *Can Med Assoc J* 2000;162(13):1815-1820.
- 37 [125] Price DD, Craggs J, Nicholas Verne G, Perlstein WM, Robinson ME. Placebo analgesia is  
38 accompanied by large reductions in pain-related brain activity in irritable bowel syndrome  
39 patients. *Pain* 2007;127(1):63-72.
- 40 [126] Price DD, Long S, Wilsey B, Rafii A. Analysis of peak magnitude and duration of analgesia  
41 produced by local anesthetics injected into sympathetic ganglia of complex regional pain  
42 syndrome patients. *Clin J Pain* 1998;14(3):216-226.
- 43 [127] Price DD, Milling LS, Kirsch I, Duff A, Montgomery GH, Nicholls SS. An analysis of factors that  
44 contribute to the magnitude of placebo analgesia in an experimental paradigm. *Pain*  
45 1999;83(2):147-156.
- 46 [128] Rainville P, Duncan GH, Price DD, Carrier B, Bushnell MC. Pain affect encoded in human  
47 anterior cingulate but not somatosensory cortex. *Science* 1997;277(5328):968-971.
- 48 [129] Rawling MJ, Wiebe ER. A randomized controlled trial of fentanyl for abortion pain. *Am J Obstet*  
49 *Gynecol* 2001;185(1):103-107.
- 50 [130] Ristikankare M, Hartikainen J, Heikkinen M, Janatuinen E, Julkunen R. Is routinely given  
51 conscious sedation of benefit during colonoscopy? *Gastrointest Endosc* 1999;49(5):566-572.
- 52 [131] Robinson R, Darlow S, Wright SJ, Watters C, Carr I, Gadsby G, Mayberry J. Is transcutaneous  
53 electrical nerve stimulation an effective analgesia during colonoscopy? *Postgrad Med J*  
54 2001;77(909):445-446.
- 55  
56  
57  
58  
59  
60

- 1  
2  
3 [132] Rowbotham MC, Davies PS, Verkempinck C, Galer BS. Lidocaine patch: double-blind controlled  
4 study of a new treatment method for post-herpetic neuralgia. *Pain* 1996;65(1):39-44.
- 5 [133] Ruoff GE, Rosenthal N, Jordan D, Karim R, Kamin M. Tramadol/Acetaminophen combination  
6 tablets for the treatment of chronic lower back pain: A multicenter, randomized, double-  
7 blind, placebo-controlled outpatient study. *Clin Ther* 2003;25(4):1123-1141.
- 8 [134] Sanders GE, Reinert O, Tepe R, Maloney P. Chiropractic adjustive manipulation on subjects  
9 with acute low back pain: visual analog pain scores and plasma beta-endorphin levels. *J*  
10 *Manipulative Physiol Ther* 1990;13(7):391-395.
- 11 [135] Scharf HP, Mansmann U, Streitberger K, Witte S, Kramer J, Maier C, Trampisch HJ, Victor N.  
12 Acupuncture and knee osteoarthritis: A three-armed randomized trial. *Ann Intern Med*  
13 2006;145(1):12-20.
- 14 [136] Scharff L, Marcus DA, Masek BJ. A Controlled Study of Minimal-Contact Thermal Biofeedback  
15 Treatment in Children With Migraine. *J Pediatr Psychol* 2002;27(2):109-119.
- 16 [137] Schnebel BE, Simmons JW. The use of oral colchicine for low-back pain. A double-blind study.  
17 *Spine (Phila Pa 1976)* 1988;13(3):354-357.
- 18 [138] Schnitzer TJ, Gray WL, Paster RZ, Kamin M. Efficacy of tramadol in treatment of chronic low  
19 back pain. *J Rheumatol* 2000;27(3):772-778.
- 20 [139] Scott DJ, Stohler CS, Egnatuk CM, Wang H, Koeppe RA, Zubieta J-K. Individual Differences in  
21 Reward Responding Explain Placebo-Induced Expectations and Effects. *Neuron*  
22 2007;55(2):325-336.
- 23 [140] Scott DJ, Stohler CS, Egnatuk CM, Wang H, Koeppe RA, Zubieta J. Placebo and nocebo effects  
24 are defined by opposite opioid and dopaminergic responses. *Arch Gen Psychiatry*  
25 2008;65(2):220-231.
- 26 [141] Snyder-Mackler L, Barry AJ, Perkins AI, Soucek MD. Effects of helium-neon laser irradiation on  
27 skin resistance and pain in patients with trigger points in the neck or back. *Phys Ther*  
28 1989;69(5):336-341.
- 29 [142] Soriano F, Rios R. Gallium arsenide laser treatment of chronic low back pain: A prospective,  
30 randomized and double blind study. *Laser Therapy* 1998;10(4):175-180.
- 31 [143] Stransky M, Rubin A, Lava NS, Lazaro RP. Treatment of carpal tunnel syndrome with vitamin  
32 B6: a double-blind study. *South Med J* 1989;82(7):841-842.
- 33 [144] Szpalski M, Hayez JP. Objective functional assessment of the efficacy of tenoxicam in the  
34 treatment of acute low back pain. A double-blind placebo-controlled study. *Br J Rheumatol*  
35 1994;33(1):74-78.
- 36 [145] Tashjian RZ, Banerjee R, Bradley MP, Alford W, Fadale PD. Zolpidem reduces postoperative  
37 pain, fatigue, and narcotic consumption following knee arthroscopy: a prospective  
38 randomized placebo-controlled double-blinded study. *J Knee Surg* 2006;19(2):105-111.
- 39 [146] Theroux MC, West DW, Corddry DH, Hyde PM, Bachrach SJ, Cronan KM, Kettrick RG. Efficacy of  
40 intranasal midazolam in facilitating suturing of lacerations in preschool children in the  
41 emergency department. *Pediatrics* 1993;91(3):624-627.
- 42 [147] Thomas KS, Muir KR, Doherty M, Jones AC, O'Reilly SC, Bassej EJ. Home based exercise  
43 programme for knee pain and knee osteoarthritis: randomised controlled trial. *BMJ*  
44 2002;325(7367):752.
- 45 [148] Toya S, Motegi M, Inomata K, Ohshiro T, Macda T. Report on a computer-randomized double  
46 blind clinical trial to determine the effectiveness of the GaAlAs (830 nm) diode laser for pain  
47 attenuation in selected pain groups. *Laser Therapy* 1994;6:143-148.
- 48 [149] Tritrakarn T, Lertakyamanee J, Koompong P, Soontrapa S, Somprakit P, Tantiwong A, Jittapapai  
49 S. Both EMLA and Placebo Cream Reduced Pain during Extracorporeal Piezoelectric Shock  
50 Wave Lithotripsy with the Piezolith 2300. *Anesthesiology* 2000;92(4):1049-1054.
- 51 [150] Vase L, Robinson ME, Verne GN, Price DD. The contributions of suggestion, desire, and  
52 expectation to placebo effects in irritable bowel syndrome patients: An empirical  
53 investigation. *Pain* 2003;105(1-2):17-25.
- 54  
55  
56  
57  
58  
59  
60

- 1  
2  
3 [151] Vase L, Robinson ME, Verne GN, Price DD. Increased placebo analgesia over time in irritable  
4 bowel syndrome (IBS) patients is associated with desire and expectation but not  
5 endogenous opioid mechanisms. *Pain* 2005;115(3):338-347.  
6  
7 [152] Verne GN, Robinson ME, Vase L, Price DD. Reversal of visceral and cutaneous hyperalgesia by  
8 local rectal anesthesia in irritable bowel syndrome (IBS) patients. *Pain* 2003;105(1):223-230.  
9  
10 [153] Vondrackova D, Leyendecker P, Meissner W, Hopp M, Szombati I, Hermanns K, Ruckes C,  
11 Weber S, Grothe B, Fleischer W, Reimer K. Analgesic efficacy and safety of oxycodone in  
12 combination with naloxone as prolonged release tablets in patients with moderate to severe  
13 chronic pain. *The journal of pain : official journal of the American Pain Society*  
14 2008;9(12):1144-1154.  
15  
16 [154] Vorsanger GJ, Xiang J, Gana TJ, Pascual ML, Fleming RR. Extended-release tramadol (tramadol  
17 ER) in the treatment of chronic low back pain. *J Opioid Manag* 2008;4(2):87-97.  
18  
19 [155] Voudouris NJ, Peck CL, Coleman G. Conditioned placebo responses. *J Pers Soc Psychol*  
20 1985;48(1):47-53.  
21  
22 [156] Voudouris NJ, Peck CL, Coleman G. Conditioned response models of placebo phenomena:  
23 further support. *Pain* 1989;38(1):109-116.  
24  
25 [157] Voudouris NJ, Peck CL, Coleman G. The role of conditioning and verbal expectancy in the  
26 placebo response. *Pain* 1990;43(1):121-128.  
27  
28 [158] Wager TD, Matre D, Casey KL. Placebo effects in laser-evoked pain potentials. *Brain Behav*  
29 *Immun* 2006;20(3):219-230.  
30  
31 [159] Wager TD, Rilling JK, Smith EE, Sokolik A, Casey KL, Davidson RJ, Kosslyn SM, Rose RM, Cohen  
32 JD. Placebo-Induced Changes in fMRI in the Anticipation and Experience of Pain. *Science*  
33 2004;303(5661):1162-1167.  
34  
35 [160] Wager TD, Scott DJ, Zubieta J-K. Placebo effects on human  $\mu$ -opioid activity during pain.  
36 *Proceedings of the National Academy of Sciences* 2007;104(26):11056-11061.  
37  
38 [161] Walton RE, Chiappinelli J. Prophylactic penicillin: effect on posttreatment symptoms following  
39 root canal treatment of asymptomatic periapical pathosis. *J Endod* 1993;19(9):466-470.  
40  
41 [162] Wang B, Tang J, White PF, Naruse R, Sloninsky A, Kariger R, Gold J, Wender RH. Effect of the  
42 Intensity of Transcutaneous Acupoint Electrical Stimulation on the Postoperative Analgesic  
43 Requirement. *Anesth Analg* 1997;85(2):406-413.  
44  
45 [163] Watson A, El-Dereby W, Bentley DE, Vogt BA, Jones AKP. Categories of placebo response in the  
46 absence of site-specific expectation of analgesia. *Pain* 2006;126(1):115-122.  
47  
48 [164] Watson A, El-Dereby W, Vogt BA, Jones AKP. Placebo analgesia is not due to compliance or  
49 habituation: EEG and behavioural evidence. *Neuroreport* 2007;18(8):771-775  
50 710.1097/WNR.1090b1013e3280c1091e1092a1098.  
51  
52 [165] Webster LR, Butera PG, Moran LV, Wu N, Burns LH, Friedmann N. Oxytrex minimizes physical  
53 dependence while providing effective analgesia: a randomized controlled trial in low back  
54 pain. *The journal of pain : official journal of the American Pain Society* 2006;7(12):937-946.  
55  
56 [166] Witt C, Brinkhaus B, Jena S, Linde K, Streng A, Wagenpfeil S, Hummelsberger J, Walther HU,  
57 Melchart D, Willich SN. Acupuncture in patients with osteoarthritis of the knee: a  
58 randomised trial. *Lancet* 2005;366 136-143.  
59  
60 [167] Wu M-T, Sheen J-M, Chuang K-H, Yang P, Chin S-L, Tsai C-Y, Chen C-J, Liao J-R, Lai P-H, Chu K-A,  
Pan H-B, Yang C-F. Neuronal Specificity of Acupuncture Response: A fMRI Study with  
Electroacupuncture. *Neuroimage* 2002;16(4):1028-1037.  
[168] Zubieta JK, Bueller JA, Jackson LR, Scott DJ, Xu Y, Koeppe RA, Nichols TE, Stohler CS. Placebo  
Effects Mediated by Endogenous Opioid Activity on  $\alpha$ -Opioid Receptors. *The Journal of  
Neuroscience* 2005;25(34):7754-7762.  
[169] Zubieta JK, Yau WY, Scott DJ, Stohler CS. Belief or Need? Accounting for individual variations in  
the neurochemistry of the placebo effect. *Brain Behav Immun* 2006;20(1):15-26.



# PRISMA 2009 Checklist

| Section/topic                      | #  | Checklist item                                                                                                                                                                                                                                                                                              | Reported on page # |
|------------------------------------|----|-------------------------------------------------------------------------------------------------------------------------------------------------------------------------------------------------------------------------------------------------------------------------------------------------------------|--------------------|
| <b>TITLE</b>                       |    |                                                                                                                                                                                                                                                                                                             |                    |
| Title                              | 1  | Identify the report as a systematic review, meta-analysis, or both.                                                                                                                                                                                                                                         | n/a                |
| <b>ABSTRACT</b>                    |    |                                                                                                                                                                                                                                                                                                             |                    |
| Structured summary                 | 2  | Provide a structured summary including, as applicable: background; objectives; data sources; study eligibility criteria, participants, and interventions; study appraisal and synthesis methods; results; limitations; conclusions and implications of key findings; systematic review registration number. | n/a                |
| <b>INTRODUCTION</b>                |    |                                                                                                                                                                                                                                                                                                             |                    |
| Rationale                          | 3  | Describe the rationale for the review in the context of what is already known.                                                                                                                                                                                                                              | 3                  |
| Objectives                         | 4  | Provide an explicit statement of questions being addressed with reference to participants, interventions, comparisons, outcomes, and study design (PICOS).                                                                                                                                                  | n/a                |
| <b>METHODS</b>                     |    |                                                                                                                                                                                                                                                                                                             |                    |
| Protocol and registration          | 5  | Indicate if a review protocol exists, if and where it can be accessed (e.g., Web address), and, if available, provide registration information including registration number.                                                                                                                               | n/a                |
| Eligibility criteria               | 6  | Specify study characteristics (e.g., PICOS, length of follow-up) and report characteristics (e.g., years considered, language, publication status) used as criteria for eligibility, giving rationale.                                                                                                      | 5                  |
| Information sources                | 7  | Describe all information sources (e.g., databases with dates of coverage, contact with study authors to identify additional studies) in the search and date last searched.                                                                                                                                  | 4                  |
| Search                             | 8  | Present full electronic search strategy for at least one database, including any limits used, such that it could be repeated.                                                                                                                                                                               | n/a                |
| Study selection                    | 9  | State the process for selecting studies (i.e., screening, eligibility, included in systematic review, and, if applicable, included in the meta-analysis).                                                                                                                                                   | 4, Fig1            |
| Data collection process            | 10 | Describe method of data extraction from reports (e.g., piloted forms, independently, in duplicate) and any processes for obtaining and confirming data from investigators.                                                                                                                                  | 6                  |
| Data items                         | 11 | List and define all variables for which data were sought (e.g., PICOS, funding sources) and any assumptions and simplifications made.                                                                                                                                                                       | 6                  |
| Risk of bias in individual studies | 12 | Describe methods used for assessing risk of bias of individual studies (including specification of whether this was done at the study or outcome level), and how this information is to be used in any data synthesis.                                                                                      | n/a                |
| Summary measures                   | 13 | State the principal summary measures (e.g., risk ratio, difference in means).                                                                                                                                                                                                                               | n/a                |
| Synthesis of results               | 14 | Describe the methods of handling data and combining results of studies, if done, including measures of consistency (e.g., $I^2$ ) for each meta-analysis.                                                                                                                                                   | 6                  |



# PRISMA 2009 Checklist

| Section/topic                 | #  | Checklist item                                                                                                                                                                                           | Reported on page # |
|-------------------------------|----|----------------------------------------------------------------------------------------------------------------------------------------------------------------------------------------------------------|--------------------|
| Risk of bias across studies   | 15 | Specify any assessment of risk of bias that may affect the cumulative evidence (e.g., publication bias, selective reporting within studies).                                                             | n/a                |
| Additional analyses           | 16 | Describe methods of additional analyses (e.g., sensitivity or subgroup analyses, meta-regression), if done, indicating which were pre-specified.                                                         | n/a                |
| <b>RESULTS</b>                |    |                                                                                                                                                                                                          |                    |
| Study selection               | 17 | Give numbers of studies screened, assessed for eligibility, and included in the review, with reasons for exclusions at each stage, ideally with a flow diagram.                                          | Fig1               |
| Study characteristics         | 18 | For each study, present characteristics for which data were extracted (e.g., study size, PICOS, follow-up period) and provide the citations.                                                             | n/a                |
| Risk of bias within studies   | 19 | Present data on risk of bias of each study and, if available, any outcome level assessment (see item 12).                                                                                                | n/a                |
| Results of individual studies | 20 | For all outcomes considered (benefits or harms), present, for each study: (a) simple summary data for each intervention group (b) effect estimates and confidence intervals, ideally with a forest plot. | n/a                |
| Synthesis of results          | 21 | Present results of each meta-analysis done, including confidence intervals and measures of consistency.                                                                                                  | n/a                |
| Risk of bias across studies   | 22 | Present results of any assessment of risk of bias across studies (see Item 15).                                                                                                                          | n/a                |
| Additional analysis           | 23 | Give results of additional analyses, if done (e.g., sensitivity or subgroup analyses, meta-regression [see Item 16]).                                                                                    | n/a                |
| <b>DISCUSSION</b>             |    |                                                                                                                                                                                                          |                    |
| Summary of evidence           | 24 | Summarize the main findings including the strength of evidence for each main outcome; consider their relevance to key groups (e.g., healthcare providers, users, and policy makers).                     | 21                 |
| Limitations                   | 25 | Discuss limitations at study and outcome level (e.g., risk of bias), and at review-level (e.g., incomplete retrieval of identified research, reporting bias).                                            | 22-3               |
| Conclusions                   | 26 | Provide a general interpretation of the results in the context of other evidence, and implications for future research.                                                                                  | 22-3               |
| <b>FUNDING</b>                |    |                                                                                                                                                                                                          |                    |
| Funding                       | 27 | Describe sources of funding for the systematic review and other support (e.g., supply of data); role of funders for the systematic review.                                                               | 1                  |

From: Moher D, Liberati A, Tetzlaff J, Altman DG, The PRISMA Group (2009). Preferred Reporting Items for Systematic Reviews and Meta-Analyses: The PRISMA Statement. PLoS Med 6(7): e1000097. doi:10.1371/journal.pmed1000097

For more information, visit: [www.prisma-statement.org](http://www.prisma-statement.org).
