# Supplementary material for: What techniques might be used to harness placebo effects in non-malignant pain? A literature review and survey to develop a taxonomy
Source: PubMed Central journal article supplement (PMC5734496; doi:10.1136/bmjopen-2016-015516), 2017-06-30
Supplement: bmjopen-2016-015516supp001.pdf [file bmjopen-2016-015516supp001.pdf]

## Supplementary Digital Content

### List of Included Studies

[1-169]

- [1] Alfano AP, Taylor AG, Foresman PA, Dunk PR, McConnell GG, Gillies GT. Static magnetic fields for treatment of fibromyalgia: A randomized controlled trial. *J Altern Complement Med* 2001;7(1):53.
- [2] Alford JW, Fadale PD. Evaluation of postoperative bupivacaine infusion for pain management after anterior cruciate ligament reconstruction. *Arthroscopy-the Journal of Arthroscopic and Related Surgery* 2003;19(8):855.
- [3] Amanzio M, Benedetti F. Neuropharmacological Dissection of Placebo Analgesia: Expectation-Activated Opioid Systems versus Conditioning-Activated Specific Subsystems. *The Journal of Neuroscience* 1999;19(1):484-494.
- [4] Amanzio M, Pollo A, Maggi G, Benedetti F. Response variability to analgesics: a role for non-specific activation of endogenous opioids. *Pain* 2001;90(3):205-215.
- [5] Amlie E, Weber H, Holme I. Treatment of Acute Low-back Pain with Piroxicam: Results of a Double-blind Placebo-controlled Trial. *Spine* 1987;12(5):473-476.
- [6] Andersen AN, Damm P, Tabor A, Pedersen IM, Haring M. Prevention of Breast Pain and Milk Secretion with Bromocriptine After Second-Trimester Abortion. *Acta Obstet Gynecol Scand* 1990;69(3):235-238.
- [7] Aslaksen PM, Flaten MA. The Roles of Physiological and Subjective Stress in the Effectiveness of a Placebo on Experimentally Induced Pain. *Psychosom Med* 2008;70(7):811-818.
- [8] Atkinson JH, Slater MA, Williams RA, Zisook S, Patterson TL, Grant I, Wahlgren DR, Abramson I, Garfin SR. A placebo-controlled randomized clinical trial of nortriptyline for chronic low back pain. *Pain* 1998;76(3):287-296.
- [9] Bannwarth B, Allaert FA, Avouac B, Rossignol M, Rozenberg S, Valat JP. A randomized, double-blind, placebo controlled triphosphate in study of oral adenosine subacute low back pain. *J Rheumatol* 2005;32(6):1114-1117.
- [10] Basford JR, Sheffield CG, Harmsen WS. Laser therapy: a randomized, controlled trial of the effects of low-intensity Nd:YAG laser irradiation on musculoskeletal back pain. *Arch Phys Med Rehabil* 1999;80(6):647-652.
- [11] Basmajian JV. Acute back pain and spasm. A controlled multicenter trial of combined analgesic and antispasm agents. *Spine (Phila Pa 1976)* 1989;14(4):438-439.
- [12] Benedetti F. The opposite effects of the opiate antagonist naloxone and the cholecystokinin antagonist proglumide on placebo analgesia. *Pain* 1996;64(3):535-543.
- [13] Benedetti F, Amanzio M, Baldi S, Casadio C, Cavallo A, Mancuso M, Ruffini E, Oliaro A, Maggi G. The specific effects of prior opioid exposure on placebo analgesia and placebo respiratory depression. *Pain* 1998;75(2-3):313-319.
- [14] Benedetti F, Amanzio M, Casadio C, Oliaro A, Maggi G. Blockade of nocebo hyperalgesia by the cholecystokinin antagonist proglumide. *Pain* 1997;71(2):135-140.
- [15] Benedetti F, Amanzio M, Maggi G. Potentiation of placebo analgesia by proglumide. *The Lancet* 1995;346(8984):1231.
- [16] Benedetti F, Amanzio M, Vighetti S, Asteggiano G. The Biochemical and Neuroendocrine Bases of the Hyperalgesic Nocebo Effect. *The Journal of Neuroscience* 2006;26(46):12014-12022.
- [17] Benedetti F, Arduino C, Amanzio M. Somatotopic activation of opioid systems by target-directed expectations of analgesia. *J Neurosci* 1999;19(9):3639-3648.
- [18] Benedetti F, Arduino C, Costa S, Vighetti S, Tarenzi L, Rainero I, Asteggiano G. Loss of expectation-related mechanisms in Alzheimer's disease makes analgesic therapies less effective. *Pain* 2006;121(1):133-144.

- [19] Benedetti F, Pollo A, Lopiano L, Lanotte M, Vighetti S, Rainero I. Conscious expectation and unconscious conditioning in analgesic, motor, and hormonal placebo/nocebo responses. *The Journal of Neuroscience* 2003;23(10):4315-4323.
- [20] Benedetti FMD, Amanzio MMS, Casadio CMD, Cavallo AMD, Cianci RMD, Giobbe RMD, Mancuso MMD, Ruffini EMD, Maggi GMD. Control of Postoperative Pain by Transcutaneous Electrical Nerve Stimulation After Thoracic Operations. *The Annals of Thoracic Surgery* 1997;63(3):773-776.
- [21] Berry H, Hutchinson DR. A multicentre placebo-controlled study in general practice to evaluate the efficacy and safety of tizanidine in acute low-back pain. *J Int Med Res* 1988;16(2):75-82.
- [22] Bingel U, Lorenz J, Schoell E, Weiller C, Büchel C. Mechanisms of placebo analgesia: rACC recruitment of a subcortical antinociceptive network. *Pain* 2006;120(1):8-15.
- [23] Birbara CA, Puopolo AD, Munoz DR, Sheldon EA, Mangione A, Bohidar NR, Geba GP. Treatment of chronic low back pain with etoricoxib, a new cyclo-oxygenase-2 selective inhibitor: improvement in pain and disability--a randomized, placebo-controlled, 3-month trial. *The journal of pain : official journal of the American Pain Society* 2003;4(6):307-315.
- [24] Biro P, Meier T, Cummins AS. Comparison of topical anaesthesia methods for venous cannulation in adults. *Eur J Pain* 1997;1(1):37-42.
- [25] Blanchard EB, Appelbaum KA, Radnitz CL, Michultka D, Morrill B, Kirsch C, Hillhouse J, Evans DD, Guarnieri P, Attanasio V, et al. Placebo-controlled evaluation of abbreviated progressive muscle relaxation and of relaxation combined with cognitive therapy in the treatment of tension headache. *J Consult Clin Psychol* 1990;58(2):210-215.
- [26] Blanchard EB, Appelbaum KA, Radnitz CL, Morrill B, Michultka D, Kirsch C, Guarnieri P, Hillhouse J, Evans DD, Jaccard J, et al. A controlled evaluation of thermal biofeedback and thermal biofeedback combined with cognitive therapy in the treatment of vascular headache. *J Consult Clin Psychol* 1990;58(2):216-224.
- [27] Boissel JP, Philippon AM, Gauthier E, Schbath J, Destors JM. Time course of long-term placebo therapy effects in angina pectoris. *Eur Heart J* 1986;7(12):1030-1036.
- [28] Bova JG, Bhattacharjee N, Jurdi R, Bennett WF. Comparison of no medication, placebo, and hyoscyamine for reducing pain during a barium enema. *Am J Roentgenol* 1999;172(5):1285-1287.
- [29] Brinkhaus B, Witt CM, Jena S, Linde K, Streng A, Wagenpfeil S, Irnich D, Walther HU, Melchart D, Willich SN. Acupuncture in patients with chronic low back pain - A randomized controlled trial. *Arch Intern Med* 2006;166(4):450-457.
- [30] Camilleri M, Northcutt AR, Kong S, Dukes GE, McSorley D, Mangel AW. Efficacy and safety of alosetron in women with irritable bowel syndrome: a randomised, placebo-controlled trial. *The Lancet* 2000;355(9209):1035-1040.
- [31] Carbajal R, Chauvet X, Couderc S, Olivier-Martin M. Randomised trial of analgesic effects of sucrose, glucose, and pacifiers in term neonates. *BMJ* 1999;319(7222):1393-1397.
- [32] Crette S, Leclaire R, Marcoux S, Morin F, Blaise GA, St-Pierre A, Truchon R, Parent F, Levesque J, Bergeron V, Montminy P, Blanchette C. Epidural corticosteroid injections for sciatica due to herniated nucleus pulposus. *N Engl J Med* 1997;336(23):1634-1640.
- [33] Charron J, Rainville P, Marchand S. Direct comparison of placebo effects on clinical and experimental pain. *Clin J Pain* 2006;22(2):204-211.
- [34] Cherkin DC, Sherman KJ, Avins AL, et al. A randomized trial comparing acupuncture, simulated acupuncture, and usual care for chronic low back pain. *Arch Intern Med* 2009;169(9):858-866.
- [35] Chrubasik S, Eisenberg E, Balan E, Weinberger T, Luzzati R, Conrath C. Treatment of low back pain exacerbations with willow bark extract: a randomized double-blind study. *Am J Med* 2000;109(1):9-14.

- [36] Chrubasik S, Junck H, Breitschwerdt H, Conradt C, Zappe H. Effectiveness of Harpagophytum extract WS 1531 in the treatment of exacerbation of low back pain: a randomized, placebo-controlled, double-blind study. *Eur J Anaesthesiol* 1999;16(2):118-129.
- [37] Chung SK, Price DD, Verne GN, Robinson ME. Revelation of a personal placebo response: Its effects on mood, attitudes and future placebo responding. *Pain* 2007;132(3):281-288.
- [38] Classen W, Feingold E, Netter P. Influence of sensory suggestibility on treatment outcome in headache patients. *Neuropsychobiology* 1983;10(1):44-47.
- [39] Coats TL, Borenstein DG, Nangia NK, Brown MT. Effects of valdecoxib in the treatment of chronic low back pain: results of a randomized, placebo-controlled trial. *Clin Ther* 2004;26(8):1249-1260.
- [40] Colloca L, Benedetti F. How prior experience shapes placebo analgesia. *Pain* 2006;124(1-2):126-133.
- [41] Colloca L, Benedetti F. Placebo analgesia induced by social observational learning. *Pain* 2009;144(1-2):28-34.
- [42] Colloca L, Petrovic P, Wager TD, Ingvar M, Benedetti F. How the number of learning trials affects placebo and nocebo responses. *Pain* 2010;151(2):430-439.
- [43] Colloca L, Sigauco M, Benedetti F. The role of learning in nocebo and placebo effects. *Pain* 2008;136(1-2):211-218.
- [44] Conn IG, Marshall AH, Yadav SN, Daly JC, Jaffer M. Transcutaneous electrical nerve stimulation following appendectomy: the placebo effect. *Ann R Coll Surg Engl* 1986;68(4):191-192.
- [45] Corson SL, Batzer FR, Gocial B, Kelly M, Gutmann JN, Go KJ, English ME. Is paracervical block anesthesia for oocyte retrieval effective? *Fertil Steril* 1994;62(1):133-136.
- [46] Costello M, Ramundo M, Christopher NC, Powell KR. Ethyl Vinyl Chloride Vapocoolant Spray Fails to Decrease Pain Associated with Intravenous Cannulation in Children. *Clin Pediatr (Phila)* 2006;45(7):628-632.
- [47] Coyne PJ, MacMurren M, Izzo T, Kramer T. Transcutaneous electrical nerve stimulator for procedural pain associated with intravenous needlesticks. *J Intraven Nurs* 1995;18(5):263-267.
- [48] Dapas F, Hartman SF, Martinez L, Northrup BE, Nussdorf RT, Silberman HM, Gross H. Baclofen for the treatment of acute low-back syndrome. A double-blind comparison with placebo. *Spine (Phila Pa 1976)* 1985;10(4):345-349.
- [49] De Pascalis V, Chiaradia C, Carotenuto E. The contribution of suggestibility and expectation to placebo analgesia phenomenon in an experimental setting. *Pain* 2002;96(3):393-402.
- [50] deCharms RC, Maeda F, Glover GH, Ludlow D, Pauly JM, Soneji D, Gabrieli JDE, Mackey SC. Control over brain activation and pain learned by using real-time functional MRI. *Proc Natl Acad Sci U S A* 2005;102(51):18626-18631.
- [51] Defrin R, Ariel E, Peretz C. Segmental noxious versus innocuous electrical stimulation for chronic pain relief and the effect of fading sensation during treatment. *Pain* 2005;115(1):152-160.
- [52] Dickens C, Jayson M, Sutton C, Creed F. The relationship between pain and depression in a trial using paroxetine in sufferers of chronic low back pain. *Psychosomatics* 2000;41(6):490-499.
- [53] Ditto B, France CR. The effects of applied tension on symptoms in French-speaking blood donors: a randomized trial. *Health Psychol* 2006;25(3):433-437.
- [54] Ditto B, France CR, Lavoie P, Roussos M, Adler PS. Reducing reactions to blood donation with applied muscle tension: a randomized controlled trial. *Transfusion (Paris)* 2003;43(9):1269-1275.
- [55] Dreiser RL, Marty M, Ionescu E, Gold M, Liu JH. Relief of acute low back pain with diclofenac-K 12.5 mg tablets: a flexible dose, ibuprofen 200 mg and placebo-controlled clinical trial. *Int J Clin Pharmacol Ther* 2003;41(9):375-385.
- [56] Erdogmus CB, Resch KL, Sabitzer R, Muller H, Nuhr M, Schoggl A, Posch M, Osterode W, Ungersbock K, Ebenbichler GR. Physiotherapy-based rehabilitation following disc herniation

- operation: results of a randomized clinical trial. *Spine (Phila Pa 1976)* 2007;32(19):2041-2049.
- [57] Faas A, Chavannes AW, van Eijk JT, Gubbels JW. A randomized, placebo-controlled trial of exercise therapy in patients with acute low back pain. *Spine (Phila Pa 1976)* 1993;18(11):1388-1395.
- [58] Fanti L, Gemma M, Passaretti S, Guslandi M, Testoni PA, Casati A, Torri G. Electroacupuncture Analgesia for Colonoscopy: A Prospective, Randomized, Placebo-Controlled Study. *Am J Gastroenterol* 2003;98(2):312-316.
- [59] Forster EL, Kramer JF, Lucy SD, Scudds RA, Novick RJ. Effect of tens on pain, medications, and pulmonary function following coronary artery bypass graft surgery. *CHEST Journal* 1994;106(5):1343-1348.
- [60] Foster KA, Liskin J, Cen S, Abbott A, Armisen V, Globe D, Knox L, Mitchell M, Shtir C, Azen S. The Trager approach in the treatment of chronic headache: a pilot study. *Altern Ther Health Med* 2004;10(5):40-46.
- [61] Foster NE, Thomas E, Barlas P, Hill JC, Young J, Mason E, Hay EM. Acupuncture as an adjunct to exercise based physiotherapy for osteoarthritis of the knee: randomised controlled trial. *BMJ* 2007;335(7617):436.
- [62] Frega A, Stentella P, Di Renzi F, Gallo G, Palazzetti PL, Del Vescovo M, Ciccarone M, Pachi A. Pain evaluation during carbon dioxide laser vaporization for cervical intraepithelial neoplasia: a randomized trial. *Clin Exp Obstet Gynecol* 1994;21(3):188-191.
- [63] Gale GD, Rothbart PJ, Li Y. Infrared therapy for chronic low back pain: a randomized, controlled trial. *Pain Res Manag* 2006;11(3):193-196.
- [64] Geers A, Helfer S, Weiland P, Kosbab K. Expectations and Placebo Response: A Laboratory Investigation into the Role of Somatic Focus. *J Behav Med* 2006;29(2):171-178.
- [65] Geers AL, Wellman JA, Fowler SL, Helfer SG, France CR. Dispositional optimism predicts placebo analgesia. *J Pain* 2010;11(11):1165-1171.
- [66] Goffaux P, Redmond WJ, Rainville P, Marchand S. Descending analgesia--when the spine echoes what the brain expects. *Pain* 2007;130(1-2):137-143.
- [67] Goodenough B, Kappel L, Champion GD, Laubreaux L, Nicholas MK, Ziegler JB, McInerney M. An investigation of the placebo effect and age-related factors in the report of needle pain from venipuncture in children. *Pain* 1997;72(3):383-391.
- [68] Goodkin K, Gullion CM, Agras WS. A randomized, double-blind, placebo-controlled trial of trazodone hydrochloride in chronic low back pain syndrome. *J Clin Psychopharmacol* 1990;10(4):269-278.
- [69] Grevert P, Albert LH, Goldstein A. Partial antagonism of placebo analgesia by naloxone. *Pain* 1983;16(2):129-143.
- [70] Haake M, Muller HH, Schade-Brittinger C, Basler HD, Schafer H, Maier C, Endres HG, Trampisch HJ, Molsberger A. German acupuncture trials (GERAC) for chronic low back pain. Randomized, multicenter, blinded, parallel-group trial with 3 groups *Arch Intern Med* 2007;167(17):1892-1898.
- [71] Hale ME, Ahdieh H, Ma T, Rauck R. Efficacy and safety of OPANA ER (oxymorphone extended release) for relief of moderate to severe chronic low back pain in opioid-experienced patients: a 12-week, randomized, double-blind, placebo-controlled study. *The journal of pain : official journal of the American Pain Society* 2007;8(2):175-184.
- [72] Hargreaves A, Lander J. Use of Transcutaneous Electrical Nerve Stimulation For Postoperative Pain. *Nurs Res* 1989;38(3):159-160.
- [73] Hargreaves KM, Dionne RA, Mueller GP. Plasma Beta-Endorphin-like Immunoreactivity, Pain and Anxiety Following Administration of Placebo in Oral Surgery Patients. *J Dent Res* 1983;62(11):1170-1173.
- [74] Hashish I, Hai HK, Harvey W, Feinmann C, Harris M. Reduction of postoperative pain and swelling by ultrasound treatment: a placebo effect. *Pain* 1988;33(3):303-311.

- [75] Hashish I, Harvey W, Harris M. Anti-inflammatory effects of ultrasound therapy: evidence for a major placebo effect. *Rheumatology (Oxford)* 1986;25(1):77-81.
- [76] Helms JM. Acupuncture for the management of primary dysmenorrhea. *Obstet Gynecol* 1987;69(1):51-56.
- [77] Hoirus KT, Pflieger B, McDuffie FC, Cotsonis G, Elsangak O, Hinson R, Verzosa GT. A randomized clinical trial comparing chiropractic adjustments to muscle relaxants for subacute low back pain. *J Manipulative Physiol Ther* 2004;27(6):388-398.
- [78] Hong C-Z, Chen Y-C, Pon CH, Yu J. Immediate Effects of Various Physical Medicine Modalities on Pain Threshold of an Active Myofascial Trigger Point. *Journal of Musculoskeletal Pain* 1993;1(2):37-53.
- [79] Hruby G, Ames C, Chen C, Yan Y, Sagar J, Baron P, Landman J. Assessment of efficacy of transcutaneous electrical nerve stimulation for pain management during office-based flexible cystoscopy. *Urology* 2006;67(5):914-917.
- [80] Hyland MR, Webber-Gaffney A, Cohen L, Lichtman SW. Randomized Controlled Trial of Calcaneal Taping, Sham Taping, and Plantar Fascia Stretching for the Short-Term Management of Plantar Heel Pain. *J Orthop Sports Phys Ther* 2006;36(6):364-371.
- [81] Johansen O, Brox J, Flaten MA. Placebo and Nocebo Responses, Cortisol, and Circulating Beta-Endorphin. *Psychosom Med* 2003;65(5):786-790.
- [82] Kaptchuk TJ, Stason WB, Davis RB, Legedza ATR, Schnyer RN, Kerr CE, Stone DA, Nam BH, Kirsch I, Goldman RH. Sham device v inert pill: randomised controlled trial of two placebo treatments. *Br Med J* 2006;332(7538):391-394.
- [83] Katz J, Pennella-Vaughan J, Hetzel RD, Kanazi GE, Dworkin RH. A Randomized, Placebo-Controlled Trial of Bupropion Sustained Release in Chronic Low Back Pain. *J Pain* 2005;6(10):656-661.
- [84] Katz N, Ju WD, Krupa DA, Sperling RS, Bozalis Rodgers D, Gertz BJ, Gimbel J, Coleman S, Fisher C, Nabizadeh S, Borenstein D. Efficacy and safety of rofecoxib in patients with chronic low back pain: results from two 4-week, randomized, placebo-controlled, parallel-group, double-blind trials. *Spine (Phila Pa 1976)* 2003;28(9):851-858; discussion 859.
- [85] Katz N, Rauck R, Ahdieh H, Ma T, Gerritsen van der Hoop R, Kerwin R, Podolsky G. A 12-week, randomized, placebo-controlled trial assessing the safety and efficacy of oxymorphone extended release for opioid-naive patients with chronic low back pain. *Curr Med Res Opin* 2007;23(1):117-128.
- [86] Keltner JR, Furst A, Fan C, Redfern R, Inglis B, Fields HL. Isolating the Modulatory Effect of Expectation on Pain Transmission: A Functional Magnetic Resonance Imaging Study. *The Journal of Neuroscience* 2006;26(16):4437-4443.
- [87] Kerr AR, Drexel CA, Spielman AI. The efficacy and safety of 50 mg penicillin G potassium troches for recurrent aphthous ulcers. *Oral Surg Oral Med Oral Pathol Oral Radiol Endod* 2003;96(6):685-694.
- [88] Ketenci A, Ozcan E, Karamursel S. Assessment of efficacy and psychomotor performances of thicolchicoside and tizanidine in patients with acute low back pain. *Int J Clin Pract* 2005;59(7):764-770.
- [89] Klaber Moffett JA, Richardson PH, Frost H, Osborn A. A placebo controlled double blind trial to evaluate the effectiveness of pulsed short wave therapy for osteoarthritic hip and knee pain. *Pain* 1996;67(1):121-127.
- [90] Klein RG, Eek BC. Low-energy laser treatment and exercise for chronic low back pain: double-blind controlled trial. *Arch Phys Med Rehabil* 1990;71(1):34-37.
- [91] Kober A, Scheck T, Greher M, Lieba F, Fleischhackl R, Fleischhackl S, Randunsky F, Hoerauf K. Prehospital Analgesia with Acupressure in Victims of Minor Trauma: A Prospective, Randomized, Double-Blinded Trial. *Anesth Analg* 2002;95(3):723-727 710.1213/0000539-200209000-200200035.

- [92] Kong J, Gollub RL, Polich G, Kirsch I, LaViolette P, Vangel M, Rosen B, Kaptchuk TJ. A Functional Magnetic Resonance Imaging Study on the Neural Mechanisms of Hyperalgesic Nocebo Effect. *The Journal of Neuroscience* 2008;28(49):13354-13362.
- [93] Kong J, Gollub RL, Rosman IS, Webb JM, Vangel MG, Kirsch I, Kaptchuk TJ. Brain activity associated with expectancy-enhanced placebo analgesia as measured by functional magnetic resonance imaging. *J Neurosci* 2006;26(2):381-388.
- [94] Kotani N, Kushikata T, Suzuki A, Hashimoto H, Muraoka M, Matsuki A. Insertion of intradermal needles into painful points provides analgesia for intractable abdominal scar pain. *Reg Anesth Pain Med* 2001;26(6):532-538.
- [95] Kupers R, Maeyaert J, Boly M, Faymonville ME, Laureys S. Naloxone-insensitive epidural placebo analgesia in a chronic pain patient. *Anesthesiology* 2007;106(6):1239-1242.
- [96] Lander J, Fowler-Kerry S. TENS for children's procedural pain. *Pain* 1993;52(2):209-216.
- [97] Leibing E, Leonhardt U, Koster G, Goerlitz A, Rosenfeldt J, Hilgers R, Ramadori G. Acupuncture treatment of chronic low-back pain - a randomized, blinded, placebo-controlled trial with 9-month follow-up. *Pain* 2002;96 189-196.
- [98] Levine JD, Gordon NC. Influence of the method of drug administration on analgesic response. *Nature* 1984;312(5996):755-756.
- [99] Licciardone JC, Stoll ST, Fulda KG, Russo DP, Siu J, Winn W, Swift JJ. Osteopathic Manipulative Treatment for Chronic Low Back Pain: A Randomized Controlled Trial. *Spine* 2003;28(13):1355-1362.
- [100] Lieberman MD, Jarcho JM, Berman S, Naliboff BD, Suyenobu BY, Mandelkern M, Mayer EA. The neural correlates of placebo effects: a disruption account. *Neuroimage* 2004;22(1):447-455.
- [101] Limoges MF, Rickabaugh B. Evaluation of TENS During Screening Flexible Sigmoidoscopy. *Gastroenterol Nurs* 2004;27(2):61-68.
- [102] Lin J-G, Lo M-W, Wen Y-R, Hsieh C-L, Tsai S-K, Sun W-Z. The effect of high and low frequency electroacupuncture in pain after lower abdominal surgery. *Pain* 2002;99(3):509-514.
- [103] Linde K, Streng A, Jurgens S, Hoppe A, Brinkhaus B, Witt C, Wagenpfeil S, Pfaffenrath V, Hammes MG, Weidenhammer W, Willich SN, Melchart D. Acupuncture for patients with migraine. A randomized controlled trial. *Journal of the American Medical Association* 2005;293 (2118):2125.
- [104] Lioffi C, Hatira P. Clinical Hypnosis in the Alleviation of Procedure-Related Pain in Pediatric Oncology Patients. *Int J Clin Exp Hypn* 2003;51(1):4-28.
- [105] Lipman JJ, Miller BE, Mays KS, Miller MN, North WC, Byrne WL. Peak B endorphin concentration in cerebrospinal fluid: reduced in chronic pain patients and increased during the placebo response. *Psychopharmacology (Berl)* 1990;102(1):112-116.
- [106] Manchikanti L, Pampati V, Damron K. The role of placebo and nocebo effects of perioperative administration of sedatives and opioids in interventional pain management. *Pain Physician* 2005;8(4):349-355.
- [107] Martikainen IK, Hagelberg N, Mansikka H, Hietala J, Någren K, Scheinin H, Pertovaara A. Association of striatal dopamine D2/D3 receptor binding potential with pain but not tactile sensitivity or placebo analgesia. *Neurosci Lett* 2005;376(3):149-153.
- [108] Matre D, Casey KL, Knardahl S. Placebo-Induced Changes in Spinal Cord Pain Processing. *The Journal of Neuroscience* 2006;26(2):559-563.
- [109] Mayberg HS, Silva JA, Brannan SK, Tekell JL, Mahurin RK, McGinnis S, Jerabek PA. The functional neuroanatomy of the placebo effect. *A J Psychiatry* 2002;159(5):728-737.
- [110] Melchart D, Streng A, Hoppe A, Brinkhaus B, Witt C, Wagenpfeil S, Pfaffenrath V, Hammes M, Hummelsberger J, Irnich D, Weidenhammer W, Willich SN, Linde K. Acupuncture in patients with tension-type headache: randomised controlled trial. *Br Med J* 2005;331 376-382.
- [111] Molsberger AF, Mau J, Pawelec DB, Winkler J. Does acupuncture improve the orthopedic management of chronic low back pain – a randomized, blinded, controlled trial with 3 months follow up. *Pain* 2002;99(3):579-587.

- [112] Montgomery G, Kirsch I. Mechanisms of Placebo Pain Reduction: An Empirical Investigation. *Psychological Science* 1996;7(3):174-176.
- [113] Montgomery GH, Kirsch I. Classical conditioning and the placebo effect. *Pain* 1997;72(1-2):107-113.
- [114] Morton DL, Watson A, El-Deredy W, Jones AKP. Reproducibility of placebo analgesia: Effect of dispositional optimism. *Pain* 2009;146(1&2):194-198.
- [115] Muehlbacher M, Nickel MK, Kettler C, Tritt K, Lahmann C, Leiberich PK, Nickel C, Krawczyk J, Mitterlehner FO, Rother WK, Loew TH, Kaplan P. Topiramate in treatment of patients with chronic low back pain: a randomized, double-blind, placebo-controlled study. *Clin J Pain* 2006;22(6):526-531.
- [116] Nemoto H, Nemoto Y, Toda H, Mikuni M, Fukuyama H. Placebo analgesia: a PET study. *Exp Brain Res* 2007;179(4):655-664.
- [117] Ockene JK, Barad DH, Cochrane BB, Larson JC, Gass M, Wassertheil-Smoller S, Manson JE, Barnabei VM, Lane DS, Brzyski RG, Rosal MC, Wylie-Rosett J, Hays J. Symptom experience after discontinuing use of estrogen plus progestin. *JAMA* 2005;294(2):183-193.
- [118] Pallay RM, Seger W, Adler JL, Ettlinger RE, Quaidoo EA, Lipetz R, O'Brien K, Mucciola L, Skalky CS, Petruschke RA, Bohidar NR, Geba GP. Etoricoxib reduced pain and disability and improved quality of life in patients with chronic low back pain: a 3 month, randomized, controlled trial. *Scand J Rheumatol* 2004;33(4):257-266.
- [119] Pariente J, White P, Frackowiak RSJ, Lewith G. Expectancy and belief modulate the neuronal substrates of pain treated by acupuncture. *Neuroimage* 2005;25(4):1161-1167.
- [120] Peloso PM, Fortin L, Beaulieu A, Kamin M, Rosenthal N. Analgesic efficacy and safety of tramadol/ acetaminophen combination tablets (Ultracet) in treatment of chronic low back pain: a multicenter, outpatient, randomized, double blind, placebo controlled trial. *J Rheumatol* 2004;31(12):2454-2463.
- [121] Petrovic P, Kalso E, Petersson KM, Ingvar M. Placebo and opioid analgesia-- imaging a shared neuronal network. *Science* 2002;295(5560):1737-1740.
- [122] Pollo A, Amanzio M, Arslanian A, Casadio C, Maggi G, Benedetti F. Response expectancies in placebo analgesia and their clinical relevance. *Pain* 2001;93(1):77-84.
- [123] Pollo A, Vighetti S, Rainero I, Benedetti F. Placebo analgesia and the heart. *Pain* 2003;102(1-2):125-133.
- [124] Preyde M. Effectiveness of massage therapy for subacute low-back pain: a randomized controlled trial. *Can Med Assoc J* 2000;162(13):1815-1820.
- [125] Price DD, Craggs J, Nicholas Verne G, Perlstein WM, Robinson ME. Placebo analgesia is accompanied by large reductions in pain-related brain activity in irritable bowel syndrome patients. *Pain* 2007;127(1):63-72.
- [126] Price DD, Long S, Wilsey B, Rafii A. Analysis of peak magnitude and duration of analgesia produced by local anesthetics injected into sympathetic ganglia of complex regional pain syndrome patients. *Clin J Pain* 1998;14(3):216-226.
- [127] Price DD, Milling LS, Kirsch I, Duff A, Montgomery GH, Nicholls SS. An analysis of factors that contribute to the magnitude of placebo analgesia in an experimental paradigm. *Pain* 1999;83(2):147-156.
- [128] Rainville P, Duncan GH, Price DD, Carrier B, Bushnell MC. Pain affect encoded in human anterior cingulate but not somatosensory cortex. *Science* 1997;277(5328):968-971.
- [129] Rawling MJ, Wiebe ER. A randomized controlled trial of fentanyl for abortion pain. *Am J Obstet Gynecol* 2001;185(1):103-107.
- [130] Ristikankare M, Hartikainen J, Heikkinen M, Janatuinen E, Julkunen R. Is routinely given conscious sedation of benefit during colonoscopy? *Gastrointest Endosc* 1999;49(5):566-572.
- [131] Robinson R, Darlow S, Wright SJ, Watters C, Carr I, Gadsby G, Mayberry J. Is transcutaneous electrical nerve stimulation an effective analgesia during colonoscopy? *Postgrad Med J* 2001;77(909):445-446.

- [132] Rowbotham MC, Davies PS, Verkempinck C, Galer BS. Lidocaine patch: double-blind controlled study of a new treatment method for post-herpetic neuralgia. *Pain* 1996;65(1):39-44.
- [133] Ruoff GE, Rosenthal N, Jordan D, Karim R, Kamin M. Tramadol/Acetaminophen combination tablets for the treatment of chronic lower back pain: A multicenter, randomized, double-blind, placebo-controlled outpatient study. *Clin Ther* 2003;25(4):1123-1141.
- [134] Sanders GE, Reinert O, Tepe R, Maloney P. Chiropractic adjustive manipulation on subjects with acute low back pain: visual analog pain scores and plasma beta-endorphin levels. *J Manipulative Physiol Ther* 1990;13(7):391-395.
- [135] Scharf HP, Mansmann U, Streitberger K, Witte S, Kramer J, Maier C, Trampisch HJ, Victor N. Acupuncture and knee osteoarthritis: A three-armed randomized trial. *Ann Intern Med* 2006;145(1):12-20.
- [136] Scharff L, Marcus DA, Masek BJ. A Controlled Study of Minimal-Contact Thermal Biofeedback Treatment in Children With Migraine. *J Pediatr Psychol* 2002;27(2):109-119.
- [137] Schnebel BE, Simmons JW. The use of oral colchicine for low-back pain. A double-blind study. *Spine (Phila Pa 1976)* 1988;13(3):354-357.
- [138] Schnitzer TJ, Gray WL, Paster RZ, Kamin M. Efficacy of tramadol in treatment of chronic low back pain. *J Rheumatol* 2000;27(3):772-778.
- [139] Scott DJ, Stohler CS, Egnatuk CM, Wang H, Koeppe RA, Zubieta J-K. Individual Differences in Reward Responding Explain Placebo-Induced Expectations and Effects. *Neuron* 2007;55(2):325-336.
- [140] Scott DJ, Stohler CS, Egnatuk CM, Wang H, Koeppe RA, Zubieta J. Placebo and nocebo effects are defined by opposite opioid and dopaminergic responses. *Arch Gen Psychiatry* 2008;65(2):220-231.
- [141] Snyder-Mackler L, Barry AJ, Perkins AI, Soucek MD. Effects of helium-neon laser irradiation on skin resistance and pain in patients with trigger points in the neck or back. *Phys Ther* 1989;69(5):336-341.
- [142] Soriano F, Rios R. Gallium arsenide laser treatment of chronic low back pain: A prospective, randomized and double blind study. *Laser Therapy* 1998;10(4):175-180.
- [143] Stransky M, Rubin A, Lava NS, Lazaro RP. Treatment of carpal tunnel syndrome with vitamin B6: a double-blind study. *South Med J* 1989;82(7):841-842.
- [144] Szpalski M, Hayez JP. Objective functional assessment of the efficacy of tenoxicam in the treatment of acute low back pain. A double-blind placebo-controlled study. *Br J Rheumatol* 1994;33(1):74-78.
- [145] Tashjian RZ, Banerjee R, Bradley MP, Alford W, Fadale PD. Zolpidem reduces postoperative pain, fatigue, and narcotic consumption following knee arthroscopy: a prospective randomized placebo-controlled double-blinded study. *J Knee Surg* 2006;19(2):105-111.
- [146] Theroux MC, West DW, Corddry DH, Hyde PM, Bachrach SJ, Cronan KM, Kettrick RG. Efficacy of intranasal midazolam in facilitating suturing of lacerations in preschool children in the emergency department. *Pediatrics* 1993;91(3):624-627.
- [147] Thomas KS, Muir KR, Doherty M, Jones AC, O'Reilly SC, Bassey EJ. Home based exercise programme for knee pain and knee osteoarthritis: randomised controlled trial. *BMJ* 2002;325(7367):752.
- [148] Toya S, Motegi M, Inomata K, Ohshiro T, Macda T. Report on a computer-randomized double blind clinical trial to determine the effectiveness of the GaAlAs (830 nm) diode laser for pain attenuation in selected pain groups. *Laser Therapy* 1994;6:143-148.
- [149] Tritrakarn T, Lertakyamanee J, Koompong P, Soontrapa S, Somprakit P, Tantiwong A, Jittapapai S. Both EMLA and Placebo Cream Reduced Pain during Extracorporeal Piezoelectric Shock Wave Lithotripsy with the Piezolith 2300. *Anesthesiology* 2000;92(4):1049-1054.
- [150] Vase L, Robinson ME, Verne GN, Price DD. The contributions of suggestion, desire, and expectation to placebo effects in irritable bowel syndrome patients: An empirical investigation. *Pain* 2003;105(1-2):17-25.



- [151] Vase L, Robinson ME, Verne GN, Price DD. Increased placebo analgesia over time in irritable bowel syndrome (IBS) patients is associated with desire and expectation but not endogenous opioid mechanisms. *Pain* 2005;115(3):338-347.
- [152] Verne GN, Robinson ME, Vase L, Price DD. Reversal of visceral and cutaneous hyperalgesia by local rectal anesthesia in irritable bowel syndrome (IBS) patients. *Pain* 2003;105(1):223-230.
- [153] Vondrackova D, Leyendecker P, Meissner W, Hopp M, Szombati I, Hermanns K, Ruckes C, Weber S, Grothe B, Fleischer W, Reimer K. Analgesic efficacy and safety of oxycodone in combination with naloxone as prolonged release tablets in patients with moderate to severe chronic pain. *The journal of pain : official journal of the American Pain Society* 2008;9(12):1144-1154.
- [154] Vorsanger GJ, Xiang J, Gana TJ, Pascual ML, Fleming RR. Extended-release tramadol (tramadol ER) in the treatment of chronic low back pain. *J Opioid Manag* 2008;4(2):87-97.
- [155] Voudouris NJ, Peck CL, Coleman G. Conditioned placebo responses. *J Pers Soc Psychol* 1985;48(1):47-53.
- [156] Voudouris NJ, Peck CL, Coleman G. Conditioned response models of placebo phenomena: further support. *Pain* 1989;38(1):109-116.
- [157] Voudouris NJ, Peck CL, Coleman G. The role of conditioning and verbal expectancy in the placebo response. *Pain* 1990;43(1):121-128.
- [158] Wager TD, Matre D, Casey KL. Placebo effects in laser-evoked pain potentials. *Brain Behav Immun* 2006;20(3):219-230.
- [159] Wager TD, Rilling JK, Smith EE, Sokolik A, Casey KL, Davidson RJ, Kosslyn SM, Rose RM, Cohen JD. Placebo-Induced Changes in fMRI in the Anticipation and Experience of Pain. *Science* 2004;303(5661):1162-1167.
- [160] Wager TD, Scott DJ, Zubieta J-K. Placebo effects on human  $\mu$ -opioid activity during pain. *Proceedings of the National Academy of Sciences* 2007;104(26):11056-11061.
- [161] Walton RE, Chiappinelli J. Prophylactic penicillin: effect on posttreatment symptoms following root canal treatment of asymptomatic periapical pathosis. *J Endod* 1993;19(9):466-470.
- [162] Wang B, Tang J, White PF, Naruse R, Sloninsky A, Kariger R, Gold J, Wender RH. Effect of the Intensity of Transcutaneous Acupoint Electrical Stimulation on the Postoperative Analgesic Requirement. *Anesth Analg* 1997;85(2):406-413.
- [163] Watson A, El-Derey W, Bentley DE, Vogt BA, Jones AKP. Categories of placebo response in the absence of site-specific expectation of analgesia. *Pain* 2006;126(1):115-122.
- [164] Watson A, El-Derey W, Vogt BA, Jones AKP. Placebo analgesia is not due to compliance or habituation: EEG and behavioural evidence. *Neuroreport* 2007;18(8):771-775  
710.1097/WNR.1090b1013e3280c1091e1092a1098.
- [165] Webster LR, Butera PG, Moran LV, Wu N, Burns LH, Friedmann N. Oxytrex minimizes physical dependence while providing effective analgesia: a randomized controlled trial in low back pain. *The journal of pain : official journal of the American Pain Society* 2006;7(12):937-946.
- [166] Witt C, Brinkhaus B, Jena S, Linde K, Streng A, Wagenpfeil S, Hummelsberger J, Walther HU, Melchart D, Willich SN. Acupuncture in patients with osteoarthritis of the knee: a randomised trial. *Lancet* 2005;366 136-143.
- [167] Wu M-T, Sheen J-M, Chuang K-H, Yang P, Chin S-L, Tsai C-Y, Chen C-J, Liao J-R, Lai P-H, Chu K-A, Pan H-B, Yang C-F. Neuronal Specificity of Acupuncture Response: A fMRI Study with Electroacupuncture. *Neuroimage* 2002;16(4):1028-1037.
- [168] Zubieta JK, Bueller JA, Jackson LR, Scott DJ, Xu Y, Koeppe RA, Nichols TE, Stohler CS. Placebo Effects Mediated by Endogenous Opioid Activity on  $\mu$ -Opioid Receptors. *The Journal of Neuroscience* 2005;25(34):7754-7762.
- [169] Zubieta JK, Yau WY, Scott DJ, Stohler CS. Belief or Need? Accounting for individual variations in the neurochemistry of the placebo effect. *Brain Behav Immun* 2006;20(1):15-26.
